1       **Epigenetic regulator miRNA pattern differences among SARS-**  
2               **CoV, SARS-CoV-2 and SARS-CoV-2 world-wide isolates**  
3       **delineated the mystery behind the epic pathogenicity and distinct**  
4               **clinical characteristics of pandemic COVID-19**

5  
6       Md. Abdullah-Al-Kamran Khan<sup>1</sup>, Md. Rabi Us Sany<sup>2</sup>, Md. Shafiqul Islam<sup>2</sup>, Md.  
7               Saheb Mehebul<sup>2</sup>, Abul Bashar Mir Md. Khademul Islam<sup>2\*</sup>

8  
9       <sup>1</sup>Department of Mathematics and Natural Sciences, BRAC University, Dhaka,  
10       Bangladesh.

11       <sup>2</sup>Department of Genetic Engineering & Biotechnology, University of Dhaka,  
12       Dhaka, Bangladesh.

13  
14

15       **\* Correspondence:**

16

17       Dr. Abul Bashar Mir Md. Khademul Islam  
18       Associate Professor  
19       Department of Genetic Engineering and Biotechnology  
20       University of Dhaka  
21       Dhaka 1000, Bangladesh.  
22       Email: khademul@du.ac.bd

23

24       **Keywords:** SARS-CoV-2, COVID-19, miRNA-microRNA, viral pathogenesis, immune  
25       regulation

26

27

28

29 **Abstract**

30 Detailed molecular mechanism of SARS-CoV-2 pathogenesis is still elusive to address its  
31 deadlier nature and to design effective therapeutics. Here, we present our study elucidating the  
32 interplay between the SARS-CoV and SARS-CoV-2 viruses'; and host's miRNAs, an  
33 epigenetic regulator, as a mode of pathogenesis, and enlightened how the SARS-CoV and  
34 SARS-CoV-2 infections differ in terms of their miRNA mediated interactions with host and  
35 its implications in the disease complexity. We have utilized computational approaches to  
36 predict potential host and viral miRNAs, and their possible roles in different important  
37 functional pathways. We have identified several putative host antiviral miRNAs that can  
38 target the SARS viruses, and also SARS viruses' encoded miRNAs targeting host genes. *In*  
39 *silico* predicted targets were also integrated with SARS infected human cells microarray and  
40 RNA-seq gene expression data. Comparison of the host miRNA binding profiles on 67  
41 different SARS-CoV-2 genomes from 24 different countries with respective country's  
42 normalized death count surprisingly uncovered some miRNA clusters which are associated  
43 with increased death rates. We have found that induced cellular miRNAs can be both a boon  
44 and a bane to the host immunity, as they have possible roles in neutralizing the viral threat,  
45 parallelly, they can also function as proviral factors. On the other hand, from over  
46 representation analysis, interestingly our study revealed that although both SARS-CoV and  
47 SARS-CoV-2 viral miRNAs could target broad immune signaling pathways; only some of  
48 the SARS-CoV-2 miRNAs are found to uniquely target some immune signaling pathways  
49 like- autophagy, IFN-I signaling etc, which might suggest their immune-escape mechanisms  
50 for prolonged latency inside some hosts without any symptoms of COVID-19. Further,  
51 SARS-CoV-2 can modulate several important cellular pathways which might lead to the  
52 increased anomalies in patients with comorbidities like- cardiovascular diseases, diabetes,  
53 breathing complications, etc. This might suggest that miRNAs can be a key epigenetic  
54 modulator behind the overcomplications amongst the COVID-19 patients. Our results support  
55 that miRNAs of host and SARS-CoV-2 can indeed play a role in the pathogenesis which can  
56 be further concluded with more experiments. These results will also be useful in designing  
57 RNA therapeutics to alleviate the complications from COVID-19.

58

59

60

61

62

63

64

65

66

67

68

69

## 70 1. Introduction

71 Coronavirus outbreaks have been reported over the past three decades, but the recent SARS-  
72 CoV-2 pandemic has outreached more than 200 countries and has been the causative agent  
73 for the death of 58,392 people around the globe and 1,087,374 coronavirus cases have been  
74 filed till the date of writing this article (Worldometer, 2020). Among closed cases of SARS-  
75 CoV-2, 20% of the patients have died and 5% of patients within active cases are in critical  
76 situations (Worldometer, 2020). The initial estimation of SARS-CoV-2 death rate was 3.4%,  
77 declared by WHO (WHO, 2020) requires a refresh as the global casualty is uprising, thus,  
78 this novel virus requires novel and in-depth studies to promote new strategies for the  
79 management of this pandemic.

80 Coronavirus subfamily is a single-stranded positive-sense (+ssRNA) virus with a genome  
81 size of around 30kb (Lu et al., 2020). The family is categorized into four subgenera as alpha,  
82 beta, gamma, and delta coronavirus (Cheng and Shan, 2020). SARS-CoV-2 is a beta  
83 coronavirus with a genome size of 29.9kb (Accession no. NC\_045512.2) with 11 genes being  
84 reported in NCBI Gene (NCBI-Gene, 2020). Phylogenetic analysis between SARS-CoV-2  
85 and SARS-CoV showed ~79% similarity. Whereas the distance is much longer for MERS-  
86 CoV (~50% similarity) but the closest relative to the SARS-CoV-2 is bat derived SARS-like  
87 coronavirus (~90% similarity) (Jiang et al., 2020; Lu et al., 2020; Ren et al., 2020). Genomic  
88 analysis of SARS-CoV and SARS-CoV-2 has shown substitution of 380 amino acids and  
89 deletion of ORF8a, elongation of ORF8b (84 vs 121 amino acid residues) and truncation of  
90 ORF3b (154aa in SARS-CoV whereas 22aa in SARS-CoV) (Lu et al., 2020).

91 MicroRNAs are small ncRNA molecules that regulate post-transcriptional level gene  
92 expression and its already established that viruses use host machinery to produce miRNAs  
93 (Ambros, 2001). Although miRNA can be an important anti-viral tool (Trobaugh and  
94 Klimstra, 2017) which can stimulate the innate and adaptive immune system, (Ambros, 2001;  
95 Trobaugh and Klimstra, 2017) but also can be a back door for viral propagation due to being  
96 non-antigenic thereby modulating cellular pathways without triggering host immune  
97 response, (Cullen, 2013; Głobińska et al., 2014) for example, nucleocapsid protein of  
98 coronavirus OC43 binds miR-9 and activates NF- $\kappa$ B (Lai et al., 2014). Although host  
99 microRNAs are either utilized or regulated by viruses, viral miRNAs are another side of the  
100 coin, where they regulate host gene expression, cellular proliferation, stress-related genes and  
101 even viral gene expression (Cullen, 2010; Haasnoot and Berkhout, 2011; Lai et al., 2014). A  
102 summary discussed that number of DNA and RNA viruses produce miRNAs known as viral  
103 miRNAs (v-miRNAs) to evade the host immune response (Mishra et al., 2020). Novel viral  
104 miRNAs have been predicted to play an important role in neurological disorders as well  
105 (Islam et al., 2019). Among RNA viruses, for example, HIV-1 encoded miR-H1 can cause  
106 mononuclear cells apoptosis; H5N1 influenza virus-encoded miR-HA-3p targets host PCBP2  
107 and contributes to 'cytokine storm' and mortality, and KUN-miR-1 of West Nile virus targets  
108 host's GATA4 which facilitates virus replication (Li and Zou, 2019). Host miRNAs  
109 interaction with SARS-CoV genome and viral proteins have been elucidated to suppress viral  
110 growth and immune evasion (Mallick et al., 2009). Novel classes of ncRNAs have been also  
111 observed by studies those might play a definitive role in pathogenesis and survival (Liu et al.,  
112 2018). Respiratory viral infections caused by influenza, rhinovirus, adenovirus, RSV and  
113 coronaviruses can be related to aberrant host miRNA expression and their effect on host can  
114 be like - cell apoptosis, inhibition of immunologic pathways, down regulation of host  
115 antiviral responses etc (Mallick et al., 2009; Bondanese et al., 2014; Islam et al., 2019; Li and  
116 Zou, 2019; Mishra et al., 2020). Transmissible gastroenteritis virus (TGEV) although induce  
117 significant IFN-I production after infection by inducing endoplasmic reticulum (ER), it can

118 evade antiviral effect of IFN-I by downregulating miR-30a-5p that normally enhances IFN-I  
119 antiviral activity (Ma et al., 2018).

120 On the other hand, host miRNA expression plays a major role in controlling viral  
121 pathogenesis by mediating T cells and antiviral effector functions (Dickey et al., 2016). The  
122 first reported example of a cellular miRNA that targets a viral RNA genome is miR-32 which  
123 targets the retrovirus PFV-1 transcripts and results in reduced virus replication (Lecellier et  
124 al., 2005). Similarly, miR-24, miR-93 can target VSV virus L and P protein (Otsuka et al.,  
125 2007); miR-29a targets HIV Nef protein (Ahluwalia et al., 2008) to inhibit replication; miR-  
126 1, miR-30, miR-128, miR-196, miR-296, miR-351, miR-431, miR-448 targets HCV C and  
127 NS5A protein to inhibits translation/replication by inducing IFN signaling (Pedersen et al.,  
128 2007). Thus, miRNA can provide a different perspective in explaining the pathogenesis and  
129 infectivity of the novel SARS-CoV-2. Although SARS-CoV is distantly related to SARS-  
130 CoV-2, there are some similarities in their signs and symptoms even they might be similar in  
131 pathogenesis but there are crucial differences between two diseases too (Xu et al., 2020). On  
132 the other hand, SARS-CoV-2 has infected many countries, and which resulted a stable  
133 mutation rate and resulted some variation (Cullen, 2006; Dykxhoorn, 2007). There are  
134 evidence that viral pathogens can have novel immune evasion role by utilizing host miRNA  
135 (Islam et al., 2019; Mishra et al., 2020).

136 However, detailed miRNA mediated epigenetic interplay between SARS-CoV-2 and host yet  
137 to be elucidated. It is not known what the probable miRNAs produced by SARS-CoV-2 are  
138 affecting which human processes; also, which anti-viral miRNAs taking part in host  
139 immunity. The genomic difference which in result controls the host miRNA target sites and  
140 viral miRNAs might explain the difference SARS-CoV and various isolated of SARS-CoV-2  
141 in pathogenesis and infectivity. Here in this study, we hypothesize on three potential effects  
142 of host and viral miRNA – (1) Genomic differences between SARS-CoV and SARS-CoV2  
143 can led to variations in host miRNA binding and differences in hence pathogenicity, signs  
144 and symptoms of these diseases and might explain the relatively longer incubation period of  
145 SARS-CoV-2. (2) Similarly, on the other hand, there might be differences in viral miRNAs  
146 that can regulate expressions of different sets of host genes which in turn can be  
147 advantageous to the virus or the host. (3) Due to fast mutation rate, observed variations  
148 among SARS-CoV-2 isolates in different regions of the world might result in variation in  
149 host capacities to target the virus with its miRNAs. This, in turn, might play a significant role  
150 in varying degrees of disease severity, symptoms and mortality rate in different regions. In  
151 this study, we have done comparative analysis between SARS-CoV and SARS-CoV-2 in  
152 respect of host miRNA–viral genome interaction as well their differences based on region-  
153 specific isolates of SARS-CoV-2; viral miRNA-host mRNA interactions to delineate the  
154 exclusive features of COVID-19 and their roles in viral survival and pathogenicity in respect  
155 of SARS-CoV (Figure 1).

156

## 157 **2. Materials and Methods**

### 158 **2.1 Obtaining SARS-CoV and SARS-CoV2 Genome sequences**

159 The reference genome of SARS-CoV (RefSeq Accession no. NC\_004718.3) and SARS-CoV-  
160 2 (RefSeq Accession no. NC\_045512.2) was fetched from NCBI RefSeq database (NCBI-  
161 RefSeq, 2020). Total 67 whole-genome sequences of SARS-CoV-2 isolates covering 24  
162 different countries (Supplementary file 1) were retrieved from NCBI Virus (NCBI-Virus,  
163 2020) and GISAID (GISAID, 2020).

## 164 **2.2 Obtaining human 3'UTR and mature miRNA sequences**

165 Human miRNAs were accessed from microRNA database miRBase (Kozomara et al., 2018)  
166 and 3'UTR sequences of human protein coding genes were obtained from Ensembl-Biomart  
167 (Hunt et al., 2018) (release 99).

## 168 **2.3 Prediction of viral pre-miRNA and validation**

169 We used miRNAfold (Tav et al., 2016) for *de novo* prediction of all possible precursor-  
170 miRNAs from the obtained reference sequences of SARS-CoV and SARS-CoV-2 with  
171 sliding window size of 150 and minimum hairpin size as 0. The results were validated using  
172 three different tools. First RNAfold (Gruber et al., 2008) was used with minimum free energy  
173 (MFE) and partition function fold algorithm to find stable secondary structures. Second, a  
174 fixed-order Markov model-based algorithm namely FOMmiR (Shen et al., 2012) was used  
175 and finally a SVM-based tool iMiRNA-SSF (Chen et al., 2016) was used that calculates  
176 minimum free energy (MFE), p-value of randomization test (P-value) and the local triplet  
177 sequence-structure features. The common predictions from these three tools were utilized for  
178 further analysis.

## 179 **2.4 Prediction of mature miRNA**

180 A Naive Bays classifier algorithm implemented in tool MatureBayes (Gkirtzou et al., 2010)  
181 was used to identify mature miRNA candidates within the miRNA precursor sequences.

## 182 **2.5 RNA-RNA interaction analysis**

183 Three different tools were used to analyze RNA-RNA interactions for host miRNA-viral  
184 genome and viral miRNA-host 3'UTR of coding sequences. IntaRNA 2.0 (Mann et al., 2017)  
185 was used considering sites with parameters --mode=H --model=X, --outMode=C,  $\Delta\Delta G \leq$   
186  $-10$  kcal/mol, with seed 2–8 allowing G:U base pairs. microRNA.org (Betel et al., 2008)  
187 was used with a score cutoff  $\geq 140$ , energy cutoff  $\leq -20$  kcal/mol, gap opening  $= -9.0$   
188 and gap extension  $= -4.0$ ; psRNATarget (Dai and Zhao, 2011) was also used to  
189 determine RNA-RNA interactions. Finally, the common predictions from these three tools  
190 were considered for downstream analysis.

## 191 **2.6 Target genes functional enrichment analysis**

### 192 **2.6.1 Enrichment analysis in Gitoools**

193 The functional annotation of target genes is based on Gene Ontology (GO) (Ashburner et al.,  
194 2000) as extracted from EnSEMBL (Hubbard et al., 2007) and KEGG pathway database  
195 (Kanehisa and Goto, 2000). Accordingly, all genes are classified into the ontology categories'  
196 biological process (GOBP) and pathways when possible. We have taken only the  
197 GO/pathway categories that have at least 10 genes annotated. We used Gitoools for enrichment  
198 analysis and heatmap generation (Perez-Llamas and Lopez-Bigas, 2011). Resulting p-values  
199 were adjusted for multiple testing using the Benjamin and Hochberg's method of False  
200 Discovery Rate (FDR) (Benjamini and Hochberg, 1995).

### 201 **2.6.2 Enrichment analysis using web-based tools**

202 The host miRNA targeting SARS-CoV and SARS-CoV-2 were used for functional over-  
203 representation analysis to visualize and predict the roles of these miRNA in human diseases  
204 and find enriched pathways. Besides Gitoools, functional enrichment analyses target human  
205 genes were conducted using; EnrichR (Kuleshov et al., 2016); DAVID 6.8 (Huang et al.,  
206 2009; Sherman and Lempicki, 2009); WebGestalt 2019 (Liao et al., 2019) and FunRich 3.1.3

207 (Pathan et al., 2017). The targeted genes are analyzed to determine their role in viral  
208 pathogenesis, infectivity, and immune evasion.

## 209 **2.7 Microarray expression data analysis**

210 Microarray data for change in gene expression induced by SARS-CoV on 2B4 cells infected  
211 with SARS-CoV or remained uninfected for 12, 24, and 48hrs obtained from Gene  
212 Expression Omnibus (GEO), ID GSE17400 (<https://www.ncbi.nlm.nih.gov/geo>) (Barrett et  
213 al., 2012). Raw Affymatrix CEL files were background corrected, normalized using  
214 Bioconductor package “affy” (version 1.28.1) using 'rma' algorithm. Quality of microarray  
215 experiment (data not shown) was verified by Bioconductor package “arrayQualityMetrics”  
216 (Kauffmann et al., 2009) (version 3.2.4 under Bioconductor version 3.10; R version 3.6.0).  
217 To determine genes that are differentially expressed (DE) between two experimental  
218 conditions, Bioconductor package Limma (Smyth, 2005) was utilized to generate contrast  
219 matrices and fit the corresponding linear model. Probe annotations to genes were done using  
220 the Ensembl gene model (Ensembl version 99) as extracted from Biomart (Flicek et al., 2007)  
221 and using in-house python script. When more than one probes were annotated to the same  
222 gene, the highest absolute expression value was considered (maximizing). To consider a gene  
223 is differentially expressed, multiple tests corrected, FDR (Benjamini and Hochberg, 1995) p-  
224 value  $\leq 0.05$  was used as a cut-off.

## 225 **2.8 RNA-seq expression data analysis**

226 RNA-seq raw read-count data on SARS-CoV-2 mediated expression changes in primary  
227 human lung epithelium (NHBE) and transformed lung alveolar (A549) cells were obtained  
228 from the GEO database (GSE147507) (Barrett et al., 2012). For differential expression (DE)  
229 analysis we used Bioconductor package DESeq2 (version 1.38.0) (Anders and Huber, 2010)  
230 with R version 3.6.0 (Team, 1999) with a model based on the negative binomial distribution.  
231 To avoid false positive, we considered only those transcripts where at least 10 reads are  
232 annotated and a p-value of 0.01.

## 233 **2.9 MicroRNA Clustering**

234 The hierarchal clustering of human miRNAs that could target SARS-CoV-2 genomes (binary  
235 mode) obtained from various countries was done using Manhattan distance and complete  
236 linkage analysis with the Genesis tool (Sturn et al., 2002). Human death number (per million  
237 population) due to SARS-CoV-2 infection was obtained on 2<sup>nd</sup> April 2020 from  
238 ‘worldometer’ website (Worldometer, 2020).

## 239 **2.10 Overlap Analysis**

240 Two or three-way overlap analysis was done using online venn-diagram program Venny  
241 2.1.0 (Oliveros, 2018). In case of multiple pairwise overlaps and correlation analysis, as well  
242 as heatmap generation, were done using Gitoools (Perez-Llamas and Lopez-Bigas, 2011).

## 243 **2.11 Data Visualization**

244 We have visualized human miRNA that binds to the virus genome in web-genome browsers  
245 NCBI genome data viewer (NCBI's-genome-browser, 2020).

246

## 247 **3. Results**

### 248 **3.1 Several human miRNAs are found to target SARS-CoV and SARS-CoV-2**

249 It is possible that during viral infections, host-encoded miRNAs can modulate viral infections  
250 as a means of host immune response (Girardi et al., 2018). To identify possible host miRNAs  
251 that can get induced during the SARS-CoV (R) and SARS-CoV-2 (R) infections, we have  
252 utilized a bioinformatics approach. From our rigorous analysis pipeline which covers three  
253 different well-established algorithms (IntaRNA, miRanda, and psRNATargets) to predict  
254 RNA-RNA interactions, we have identified 122 and 106 host antiviral miRNAs against  
255 SARS-CoV (R) and SARS-CoV-2 (R), respectively (Figure 2A, 2B) (Supplementary file 2).  
256 Amongst these, 27 miRNAs were found to be targeting both viruses (Figure 2A). Whilst  
257 comparing these miRNAs with the antiviral miRNAs from VIRmiRNA (Qureshi et al.,  
258 2014), we have found 4 (hsa-miR-654-5p, hsa-miR-198, hsa-miR-622, hsa-miR-323a-5p) and  
259 3 (hsa-miR-17-5p, hsa-miR-20b-5p, hsa-miR-323a-5p) host miRNAs against SARS-CoV (R)  
260 and SARS-CoV-2 (R), respectively, to have experimental evidence of having antiviral roles  
261 during infections (Figure 2A, 2B, 2C).

262 Moreover, we compared the miRNAs targeting the two reference genomes of SARS-CoV (R)  
263 and SARS-CoV-2 (R) and found most of the host miRNAs can target the ORF1ab region,  
264 followed by the S region as the second-most targeted (Figure 3A, 3B). Also, the M, N,  
265 ORF3a, ORF7a, ORF8 (ORF8a, ORF8b for SARS-CoV), 5' UTR and 3' UTR regions of  
266 both viruses were targeted by host miRNAs. The significant variance was observed in the  
267 targeting positions of the host miRNAs between these two viruses (Figure 3A, 3B).

268 Since RNA virus mutates fast, it is conceivable that mutations in crucial genomic locations  
269 would lead to differences in host miRNA binding patterns. Therefore, the ability of the host  
270 miRNAs targeting genomes of 67 SARS-CoV-2 isolates covering 24 different countries was  
271 also performed. Although, as expected, most of the identified host miRNAs' binding profiles  
272 across these isolates remained somewhat similar to that of SARS-CoV-2 reference sequence;  
273 interestingly, we have identified 24 host miRNAs that bind differentially across the isolates  
274 (Figure 4A) which might have occurred due to the genomic variations between these isolates.  
275 Complete linkage agglomerative hierarchical cluster (HCL) analysis with Manhattan distance  
276 of these miRNAs (binary mode, bind or not bind) revealed two major clusters with a side  
277 cluster for one South Korean and two Singaporean isolates (Figure 4B). As miRNA is crucial  
278 in both host defense and viral pathogenesis, to understand the significance of this cluster, we  
279 have also compared the host miRNA clusters with the death rate (normalized by per million  
280 population) from different countries. Surprisingly, relatively higher deaths are found to be  
281 more prominent in the European major clusters (right side cluster) compared to the other  
282 major cluster (left side), and also found much lower deaths in side clusters (Figure 4B).

### 283 **3.2 Host miRNAs targeting SARS-CoV and SARS-CoV-2 play crucial roles in** 284 **neutralizing the virus**

285 Though the primary action elicited by host miRNAs is to silence the viral RNA, they might  
286 also modulate some host factors which provide an edge to the viral pathogenesis. To find out  
287 if these particular pathways are also targeted by the host miRNAs induced by SARS-CoV and  
288 SARS-CoV-2 infections, we have performed miRNA pathway enrichment analysis. We have  
289 found out several such pathways those might be deregulated by the host miRNAs to suppress  
290 the entry of the virus, to prevent the spread of the virions, and in minimizing the systemic  
291 symptoms resulting from the infection (Figure 5A).

292 Host miRNAs might have a probable role in blocking the entry of the virus, as they are found  
293 to be targeting the pathways needed for viral entry- PDGF receptor-like signaling (Soroceanu  
294 et al., 2008), Arf-6 signaling (García-Expósito et al., 2011), PI3K-Akt signaling (Diehl and  
295 Schaal, 2013), EGFR signaling (Zheng et al., 2014), signaling events mediated by focal

296 adhesion kinase (Elbahesh et al., 2014), CDC42 signaling (Swaine and Dittmar, 2015),  
297 EphrinB-EPHB pathway (Wang et al., 2019), Cadherin signaling (Mateo et al., 2015), RTK  
298 signaling (Haqshenas and Doerig, 2019), etc (Figure 5A).

299 They can also block some machinery like- p38 MAPK signaling (Hirasawa et al., 2003),  
300 FAK signaling (Elbahesh et al., 2014), PI3K-Akt signaling (Diehl and Schaal, 2013), etc.  
301 which can be hijacked by viruses for their efficient replication, pre-mRNA processing and  
302 translation (Figure 5A). These host miRNAs might also try to reduce some host induced  
303 inflammatory responses to prevent acute lung damage by targeting IGF1 signaling (Li et al.,  
304 2019), VEGF signaling (Alkharsah, 2018), PAR1 signaling (Heuberger and Schuepbach,  
305 2019), integrin signaling (Teoh et al., 2015), TGF-beta signaling (Denney et al., 2018),  
306 TRAIL signaling (Cummins and Badley, 2009), etc (Figure 5A). Some signaling pathways  
307 like- CXCR4 signaling (Arnolds and Spencer, 2014), TGF-beta signaling (Denney et al.,  
308 2018), mTOR signaling (Le Sage et al., 2016), PI3K-Akt signaling (Diehl and Schaal, 2013),  
309 etc. can facilitate viral survival in infected cells by inhibiting apoptosis, autophagy, early  
310 immune responses, etc. Host miRNAs may function to downregulate these to invoke a proper  
311 immune response against the viruses (Figure 5A).

### 312 **3.3 Infection induced host miRNAs can function as a proviral factor by inhibiting host** 313 **immune surveillance pathways**

314 Host miRNAs can be like a double-edged sword as sometimes it can facilitate the viral  
315 immune evasion by targeting some important host immune responses (Bruscella et al., 2017).  
316 Our host miRNA enrichment analysis showed several significant pathways like- IFN-gamma  
317 signaling (Kang et al., 2018), TGF-beta signaling (Mogensen and Paludan, 2001), Interleukin  
318 signaling (Kimura et al., 2013), IGF1 signaling (Li et al., 2019), TRAIL signaling (Cummins  
319 and Badley, 2009), etc. which are involved in important proinflammatory cytokine signaling  
320 during viral infections (Figure 5B). Interestingly, we have found out that host miRNAs  
321 induced during SARS-CoV-2 infection may particularly downregulate different Toll-Like  
322 Receptors (TLRs) (Kimura et al., 2013) signaling which are considered as the primary  
323 stimulatory molecules for producing host antiviral responses (i.e. production of interferons  
324 and other inflammatory cytokines) (Figure 5B). Also, other receptor signaling involved in  
325 antiviral responses like- uPA-UPAR signaling (Alfano et al., 2003), TRAF6 signaling  
326 (Konno et al., 2009), S1P1 signaling (Oldstone et al., 2013), Estrogen receptor signaling  
327 (Kovats, 2015), Protease-activated Receptor (PAR) signaling (Antoniak et al., 2013), Bone  
328 morphogenetic protein (BMP) signaling (Eddowes et al., 2019), etc. can also be deregulated  
329 by the host miRNAs, leading to the host's immune suppression (Figure 5B).

### 330 **3.4 Host miRNAs' targeted downregulated pathways are related to the comorbidities** 331 **of COVID-19**

332 SARS-CoV-2 infected patients with comorbidities (i.e. cardiovascular diseases, diabetes,  
333 renal problems) are found to be more susceptible to COVID-19. To find out whether virally  
334 induced host miRNAs are playing role in these, we have performed enrichment analysis using  
335 the downregulated targets genes of the host miRNAs using the expression data obtained from  
336 GEO dataset (GSE17400 for SARS-CoV and GSE147507 for SARS-CoV-2). These revealed  
337 that the downregulated targets of host miRNAs are involved in functions and pathways like-  
338 heart development, kidney development, several neuronal processes, metabolic process,  
339 regulation of cellular ketone metabolism, insulin resistance, glucagon signaling pathway,  
340 fatty acid metabolism, PPAR signaling, etc (Figure 5C, 5D, 5E). Aberrant regulation of these  
341 processes can overcomplicate the disease conditions of patients having existing disorders.



### 342 **3.5 Viral miRNAs encoded by SARS-CoV and SARS-CoV-2 can target several host** 343 **genes**

344 Many human viruses were found to produce miRNAs to assist in their overall pathogenesis  
345 by modulating host factors (Bruscella et al., 2017). Previous study on SARS-CoV also  
346 suggests that viral small non-coding RNAs can help its efficient pathogenesis (Morales et al.,  
347 2017). Our bioinformatics approach suggests that SARS-CoV and SARS-CoV-2 can also  
348 encode some viral miRNAs. miRNAfold tool (Tav et al., 2016) yielded 529 and 519 putative  
349 pre-miRNAs from the genome of SARS-CoV and SARS-CoV-2, respectively. RNAfold tool  
350 (Gruber et al., 2008) predicted 303 and 308 of these precursors of SARS-CoV and SARS-  
351 CoV-2, respectively are highly stable for forming hairpin structures which is a prerequisite of  
352 mature miRNA formation. Using FomMiR (Shen et al., 2012) and IMiRNA-SSF (Chen et al.,  
353 2016), we then predicted which of these highly stable precursors can truly produce mature  
354 miRNAs. We have found 63 and 85 such precursors respectively for SARS-CoV and SARS-  
355 CoV-2. Using Maturebayes tool, from these precursors, we have identified 126 and 170  
356 mature miRNAs from SARS-CoV and SARS-CoV-2, respectively (Supplementary file 3).  
357 We have predicted the human target genes by utilizing three different target prediction tools  
358 and to reduce false positive, we have taken only the common set. This returned 5292 and  
359 6369 human target genes for SARS-CoV and SARS-CoV-2, respectively (Supplementary file  
360 4). Out of these, 2992 genes are found to be common in both, while 2300 and 3377 genes  
361 were found to be unique targets of SARS-CoV and SARS-CoV-2, respectively. An apparent  
362 difference of the coding regions of miRNAs between SARS-CoV and SARS-CoV-2 was  
363 observed (Figure 6A, 6B).

### 364 **3.6 SARS-CoV and SARS-CoV-2 can evade host's immune surveillance pathway by** 365 **utilizing its miRNAs**

366 Many viruses use their miRNAs to suppress or escape host's immune responses (Mishra et  
367 al., 2020). To identify which pathways are associated with SARS-CoV and SARS-CoV  
368 infection, we have performed the gene ontology (GO) and pathway functional enrichment of  
369 the targeted genes using different tools. This reveals a myriad of significant functions and  
370 pathways involved in host immune responses, like- Wnt signaling (Ljungberg et al., 2019),  
371 MAPK signaling (Kimura et al., 2013), T cell-mediated immunity (Channappanavar et al.,  
372 2014), autophagy (Yordy and Iwasaki, 2011), FGF receptor binding (van Asten et al., 2018),  
373 TGF-beta signaling (Denney et al., 2018), VEGF signaling (Alkharsah, 2018), ErbB signaling  
374 (Zheng et al., 2014), mTOR signaling (Le Sage et al., 2016), TNF-alpha signaling (Kimura et  
375 al., 2013), etc are particularly targeted by SARS-CoV-2 (Figure 7A-7E).

376 Functions and pathways like heart development, brain development, and insulin signaling  
377 pathway, etc. (Figure 7A-7E) were also enriched for SARS-CoV-2 only, which can be  
378 targeted by the viral miRNAs, making the patients with previous complications more  
379 susceptible to COVID-19 as well as can lead to several signs uniquely found in SARS-CoV-2  
380 infected patients.

381 We have also identified the downregulated target genes by curating the GEO expression  
382 datasets (GSE17400 for SARS-CoV and GSE147507 for SARS-CoV-2) and found 1890 and  
383 35 downregulated target genes in SARS-CoV and SARS-CoV-2, respectively  
384 (Supplementary file 5). These downregulated target genes are found to be involved in  
385 different immune signaling pathways as well as different organ-specific functions related  
386 pathways (Figure 8).

387

#### 388 4. Discussion

389 Cellular miRNAs play a crucial role during the viral infection to strengthen host immunity by  
390 targeting virus's genes as well as targeting pathways that viruses utilize for their survival and  
391 immune evasion (Girardi et al., 2018). Viruses themselves can encode their miRNAs to target  
392 these immune signaling pathways (Bruscella et al., 2017). COVID-19 has become a serious  
393 public health issue recently, though the complete molecular mechanism of pathogenesis is not  
394 fully understood yet. In this context, we have carried out this whole study to investigate the  
395 miRNA mediated interactions between host and SARS-CoV-2 virus, which might shed some  
396 insights on the tug-of-war between host's immune responses and virus's circumvention  
397 strategies. Though the disease conditions caused by SARS-CoV and SARS-CoV-2 are more  
398 or less similar, still several unique features (i.e. long incubation, enhanced latency,  
399 asymptomatic infection, intense pain, severe lung damage, etc. (Ceccarelli et al., 2020)) of  
400 SARS-CoV-2 making it more challenging to manage compared to SARS-CoV. So, we also  
401 sought to find out if there are any existing differences between SARS-CoV and SARS-CoV-2  
402 in the context of miRNA mediated regulation of host responses.

403 As host miRNAs are one of the key immune protection against viral infections, we have tried  
404 to find out which cellular miRNAs can target SARS-CoV and SARS-CoV-2 genes. Due to  
405 differences in the genome sequences between these two viruses, there was a significant  
406 difference between cellular miRNAs and their targeting viral genes. Likewise, some of the  
407 commonly found cellular miRNAs were showing differential binding preferences for these  
408 viral genes. (Figure 2A). Previous study by Mallick *et al.* showed that cellular miRNAs can  
409 boost up host's immune response as well as they can assist in viral immune evasion  
410 mechanisms (Mallick et al., 2009). Another study by Morales *et al.* suggested that SARS-  
411 CoV can encode small non-coding RNAs which can play roles in inflammatory lung  
412 pathology (Morales et al., 2017). We also compared the induced host miRNAs' profiles of 67  
413 SARS-CoV-2 isolates from 24 different countries across the globe. From this analysis, we  
414 have identified several clusters and associated miRNAs, and our correlation study between  
415 these clusters with the death counts all over the world shed some light on the burning  
416 question and suggests why the Europeans are more prone to COVID-19 (Figure 3B).

417 We found several miRNAs with experimentally validated antiviral roles; among those, hsa-  
418 miR-323a-5p and hsa-miR-654-5p (predicted for SARS-CoV) were found to inhibit viral  
419 replication in H1N1 Influenza virus infection (Song et al., 2010), while hsa-miR-17-5p and  
420 hsa-miR-20b-5p (predicted for SARS-CoV-2) were found to be upregulated in H7N9  
421 Influenza virus infection (Zhu et al., 2014).

422 Apart from the basic role of cellular miRNAs in eliminating the transcripts of viruses, they  
423 can also modulate some host pathways which supposedly can be utilized by the infecting  
424 virus to avoid host's immune response. We also identified several such pathways involved in  
425 viral entry, replication, translation mechanisms, etc. which can be targeted by the cellular  
426 miRNAs induced by SARS-CoV and SARS-CoV-2 infection. Moreover, several immune  
427 response pathways like- TLR signaling, interleukin signaling, TRAF6 signaling, etc. were  
428 exclusively found to be targeted by SARS-CoV-2 induced host miRNAs (Figure 5B) and  
429 SARS-CoV-2 encoded miRNAs can target pathways like- autophagy, IFN-I signaling, wnt  
430 signaling, mTOR signaling, etc., but SARS-CoV encoded miRNAs' targets were not found to  
431 be enriched in these pathways (Figure 7A-E). Target genes downregulated by SARS-CoV-2  
432 miRNAs are found to be involved in Ca<sup>2+</sup> signaling pathway which is considered important  
433 activators of many signaling pathways (Zhou et al., 2009) (Figure 8B). All of these suggest  
434 why SARS-CoV-2 infections might be fatal for those who are immunosuppressed (D'Antiga,  
435 2020).

436 Interestingly, our findings have enlightened several poorly understood mechanisms behind  
437 many of the unique clinical and pathological features of SARS-CoV-2 which has made it  
438 significantly different from SARS-CoV. Our predicted both cellular miRNAs and viral  
439 encoded miRNAs, induced during SARS-CoV and SARS-CoV-2 infection, were found to  
440 target cytokine signaling pathways involved in immune responses leading to the improved  
441 viral pathogenesis. Also, we found that SARS-CoV-2 miRNAs can target different important  
442 organ specific cellular functions and pathways. We showed that SARS-CoV-2 encoded  
443 miRNAs can target insulin signaling pathway (Figure 7A, Supplementary figure 1) and  
444 aberration of this pathway might overcomplicate the whole disease condition for COVID-19  
445 patients with existing diabetic problems (Shimizu et al., 1980; del Campo et al., 2012). Our  
446 data also suggests that the SARS-CoV-2 miRNAs can target heart development-related  
447 pathways (Figure 7A, Supplementary figure 1), which might lead to similar consequences  
448 like viral myocarditis (Dennert et al., 2008) making the disease more fatal for the patients  
449 with existing cardiovascular complications. These SARS-CoV-2 encoded miRNAs might  
450 also target genes associated with brain development (Figure 7A, Supplementary figure 1)  
451 which might provide clue about the neurological signs like- headaches, vomiting, and  
452 nausea. SARS-CoV-2 induced host miRNAs can also downregulate kidney development and  
453 regulation of cellular ketone metabolic processes etc. (Figure 5C) increasing kidney's burden,  
454 (Kanikarla-Marie and Jain, 2016) which might be fatal for patients who have diabetes and  
455 kidney complications. HIF-1 signaling was also found to be targeted by SARS-CoV-2  
456 miRNAs (Figure 7E, Supplementary figure 1). This pathway is found to be associated with  
457 many viral infections as HIF-1 plays an important role in cellular survival during hypoxic  
458 conditions (Santos and Andrade, 2017); COVID-19 patients suffer from the lack of oxygens  
459 due to breathing complications; so this pathway might play crucial roles to mitigate the  
460 condition, but viral miRNA mediated deregulation of this pathway might result in severe  
461 consequences.

462 Our findings can explain that the interplay of miRNAs of host and SARS-CoV-2 virus can  
463 promote viral pathogenesis by deregulating major antiviral immune signaling pathways, as  
464 well as abnormal regulations of several host pathways, might lead to increased complications  
465 in the infected patients. Our study that is conducted using machine learning and  
466 knowledgebase approaches, with further experiments, has the full potential to provide a more  
467 detailed understanding of the disease progression and based on these results, novel  
468 therapeutic interventions using RNA interference (RNAi) can be designed.

469

#### 470 **Conflict of Interest**

471 The authors declare that the research was conducted in the absence of any commercial or  
472 financial relationships that could be construed as a potential conflict of interest. The authors  
473 declare no conflict of interest.

#### 474 **Author's contribution**

475 ABMMKI conceived the project. ABMMKI and MAAKK designed the workflow. MAAKK,  
476 MRUS, MSI and MSM collected the data. All authors performed the analyses. MAAKK,  
477 MRUS, MSI and ABMMKI wrote the manuscript. All authors read and approved the final  
478 manuscript.

#### 479 **Acknowledgments**

480 We acknowledge Rafeed Rahman Turjya for valuable suggestions.

481 **Funding**

482 This project was not associated with any internal or external source of funding.

483 **Data Availability Statement**

484 Publicly available data were utilized. Analyses generated data are deposited as supplementary  
485 files.

486 **References**

- 487 Ahluwalia, J.K., Khan, S.Z., Soni, K., Rawat, P., Gupta, A., Hariharan, M., et al. (2008).  
488 Human cellular microRNA hsa-miR-29a interferes with viral nef protein expression  
489 and HIV-1 replication. *Retrovirology* 5(1), 117-117.
- 490 Alfano, M., Sidenius, N., Blasi, F., and Poli, G. (2003). The role of urokinase-type  
491 plasminogen activator (uPA)/uPA receptor in HIV-1 infection. *Journal of Leukocyte*  
492 *Biology* 74(5), 750-756. doi: 10.1189/jlb.0403176.
- 493 Alkharsah, K.R. (2018). VEGF Upregulation in Viral Infections and Its Possible Therapeutic  
494 Implications. *International journal of molecular sciences* 19(6), 1642. doi:  
495 10.3390/ijms19061642.
- 496 Ambros, V. (2001). microRNAs: tiny regulators with great potential. *Cell* 107(7), 823-826.
- 497 Anders, S., and Huber, W. (2010). Differential expression analysis for sequence count data.  
498 *Genome Biology* 11(10), R106-R106. doi: 10.1186/gb-2010-11-10-r106.
- 499 Antoniak, S., Owens, A.P., 3rd, Baunacke, M., Williams, J.C., Lee, R.D., Weithäuser, A., et  
500 al. (2013). PAR-1 contributes to the innate immune response during viral infection.  
501 *The Journal of clinical investigation* 123(3), 1310-1322. doi: 10.1172/JCI66125.
- 502 Arnolds, K.L., and Spencer, J.V. (2014). CXCR4: a virus's best friend? *Infection, genetics*  
503 *and evolution : journal of molecular epidemiology and evolutionary genetics in*  
504 *infectious diseases* 25, 146-156. doi: 10.1016/j.meegid.2014.04.018.
- 505 Ashburner, M., Ball, C.A., Blake, J.A., Botstein, D., Butler, H., Cherry, J.M., et al. (2000).  
506 Gene ontology: tool for the unification of biology. *Nature genetics* 25(1), 25-29.
- 507 Barrett, T., Wilhite, S.E., Ledoux, P., Evangelista, C., Kim, I.F., Tomashevsky, M., et al.  
508 (2012). NCBI GEO: archive for functional genomics data sets—update. *Nucleic Acids*  
509 *Research* 41(D1), D991-D995. doi: 10.1093/nar/gks1193.
- 510 Benjamini, Y., and Hochberg, Y. (1995). Controlling the false discovery rate: a practical and  
511 powerful approach to multiple testing. *Journal of the Royal statistical society: series*  
512 *B (Methodological)* 57(1), 289-300.
- 513 Betel, D., Wilson, M., Gabow, A., Marks, D.S., and Sander, C. (2008). The microRNA.org  
514 resource: targets and expression. *Nucleic Acids Research* 36(suppl\_1), D149-D153.  
515 doi: 10.1093/nar/gkm995.
- 516 Bondanese, V.P., Francisco-Garcia, A., Bedke, N., Davies, D.E., and Sanchez-Elsner, T.  
517 (2014). Identification of host miRNAs that may limit human rhinovirus replication.  
518 *World journal of biological chemistry* 5(4), 437-437.
- 519 Bruscella, P., Bottini, S., Baudesson, C., Pawlotsky, J.-M., Feray, C., and Trabucchi, M.  
520 (2017). Viruses and miRNAs: More Friends than Foes. *Frontiers in Microbiology*  
521 8(824). doi: 10.3389/fmicb.2017.00824.
- 522 Ceccarelli, M., Berretta, M., RULLO, E.V., Nunnari, G., and Cacopardo, B. (2020).  
523 Editorial—Differences and similarities between Severe Acute Respiratory Syndrome  
524 (SARS)-CoronaVirus (CoV) and SARS-CoV-2. Would a rose by another name smell  
525 as sweet? *European Review for Medical and Pharmacological Sciences* 24, 2781-  
526 2783.

- 527 Channappanavar, R., Zhao, J., and Perlman, S. (2014). T cell-mediated immune response to  
528 respiratory coronaviruses. *Immunol Res* 59(1-3), 118-128. doi: 10.1007/s12026-014-  
529 8534-z.
- 530 Chen, J., Wang, X., and Liu, B. (2016). IMiRNA-SSF: improving the identification of  
531 MicroRNA precursors by combining negative sets with different distributions.  
532 *Scientific reports* 6, 19062-19062.
- 533 Cheng, Z.J., and Shan, J. (2020). 2019 Novel coronavirus: where we are and what we know.  
534 *Infection*, 1-9.
- 535 Cullen, B.R. (2006). Viruses and microRNAs. *Nature genetics* 38(6), S25-S30.
- 536 Cullen, B.R. (2010). Five questions about viruses and microRNAs. *PLoS pathogens* 6(2).
- 537 Cullen, B.R. (2013). MicroRNAs as mediators of viral evasion of the immune system. *Nature*  
538 *immunology* 14, 205.
- 539 Cummins, N., and Badley, A. (2009). The TRAIL to viral pathogenesis: the good, the bad  
540 and the ugly. *Current molecular medicine* 9(4), 495-505. doi:  
541 10.2174/156652409788167078.
- 542 D'Antiga, L. (2020). Coronaviruses and immunosuppressed patients. The facts during the  
543 third epidemic. *Liver Transpl.* doi: 10.1002/lt.25756.
- 544 Dai, X., and Zhao, P.X. (2011). psRNATarget: a plant small RNA target analysis server.  
545 *Nucleic acids research* 39(suppl\_2), W155-W159.
- 546 del Campo, J.A., García-Valdecasas, M., Rojas, L., Rojas, Á., and Romero-Gómez, M.  
547 (2012). The Hepatitis C Virus Modulates Insulin Signaling Pathway In Vitro  
548 Promoting Insulin Resistance. *PLOS ONE* 7(10), e47904. doi:  
549 10.1371/journal.pone.0047904.
- 550 Dennert, R., Crijns, H.J., and Heymans, S. (2008). Acute viral myocarditis. *European heart*  
551 *journal* 29(17), 2073-2082. doi: 10.1093/eurheartj/ehn296.
- 552 Denney, L., Branchett, W., Gregory, L.G., Oliver, R.A., and Lloyd, C.M. (2018). Epithelial-  
553 derived TGF- $\beta$ 1 acts as a pro-viral factor in the lung during influenza A infection.  
554 *Mucosal Immunology* 11(2), 523-535. doi: 10.1038/mi.2017.77.
- 555 Dickey, L.L., Worne, C.L., Glover, J.L., Lane, T.E., and O'Connell, R.M. (2016).  
556 MicroRNA-155 enhances T cell trafficking and antiviral effector function in a model  
557 of coronavirus-induced neurologic disease. *Journal of neuroinflammation* 13(1), 240-  
558 240.
- 559 Diehl, N., and Schaal, H. (2013). Make yourself at home: viral hijacking of the PI3K/Akt  
560 signaling pathway. *Viruses* 5(12), 3192-3212. doi: 10.3390/v5123192.
- 561 Dykxhoorn, D.M. (2007). MicroRNAs in viral replication and pathogenesis. *DNA and cell*  
562 *biology* 26(4), 239-249.
- 563 Eddowes, L.A., Al-Hourani, K., Ramamurthy, N., Frankish, J., Baddock, H.T., Sandor, C., et  
564 al. (2019). Antiviral activity of bone morphogenetic proteins and activins. *Nature*  
565 *Microbiology* 4(2), 339-351. doi: 10.1038/s41564-018-0301-9.
- 566 Elbahesh, H., Cline, T., Baranovich, T., Govorkova, E.A., Schultz-Cherry, S., and Russell,  
567 C.J. (2014). Novel roles of focal adhesion kinase in cytoplasmic entry and replication  
568 of influenza A viruses. *Journal of virology* 88(12), 6714-6728. doi:  
569 10.1128/JVI.00530-14.
- 570 Flicek, P., Aken, B.L., Beal, K., Ballester, B., Caccamo, M., Chen, Y., et al. (2007). Ensembl  
571 2008. *Nucleic acids research* 36(suppl\_1), D707-D714.
- 572 García-Expósito, L., Barroso-González, J., Puigdomènech, I., Machado, J.-D., Blanco, J., and  
573 Valenzuela-Fernández, A. (2011). HIV-1 requires Arf6-mediated membrane  
574 dynamics to efficiently enter and infect T lymphocytes. *Molecular biology of the cell*  
575 22(8), 1148-1166. doi: 10.1091/mbc.E10-08-0722.

- 576 Girardi, E., López, P., and Pfeffer, S. (2018). On the Importance of Host MicroRNAs During  
577 Viral Infection. *Frontiers in genetics* 9, 439-439. doi: 10.3389/fgene.2018.00439.
- 578 GISAID. (2020). *RE: GISAID EpiFlu - Global Initiative on Sharing All Influenza Data*.
- 579 Gkirtzou, K., Tsamardinos, I., Tsakalides, P., and Poirazi, P. (2010). MatureBayes: A  
580 Probabilistic Algorithm for Identifying the Mature miRNA within Novel Precursors.  
581 *PLOS ONE* 5(8), e11843-e11843.
- 582 Głobińska, A., Pawełczyk, M., and Kowalski, M.L. (2014). MicroRNAs and the immune  
583 response to respiratory virus infections. *Expert review of clinical immunology* 10(7),  
584 963-971.
- 585 Gruber, A.R., Lorenz, R., Bernhart, S.H., Neuböck, R., and Hofacker, I.L. (2008). The  
586 Vienna RNA websuite. *Nucleic acids research* 36(Web Server issue), W70-W74. doi:  
587 10.1093/nar/gkn188.
- 588 Haasnoot, J., and Berkhout, B. (2011). "RNAi and cellular miRNAs in infections by  
589 mammalian viruses." Springer), 23-41.
- 590 Haqshenas, G., and Doerig, C. (2019). Targeting of host cell receptor tyrosine kinases by  
591 intracellular pathogens. *Science Signaling* 12(599), eaau9894. doi:  
592 10.1126/scisignal.aau9894.
- 593 Heuberger, D.M., and Schuepbach, R.A. (2019). Protease-activated receptors (PARs):  
594 mechanisms of action and potential therapeutic modulators in PAR-driven  
595 inflammatory diseases. *Thrombosis Journal* 17(1), 4. doi: 10.1186/s12959-019-0194-  
596 8.
- 597 Hirasawa, K., Kim, A., Han, H.-S., Han, J., Jun, H.-S., and Yoon, J.-W. (2003). Effect of p38  
598 Mitogen-Activated Protein Kinase on the Replication of Encephalomyocarditis Virus.  
599 *Journal of Virology* 77(10), 5649-5656. doi: 10.1128/jvi.77.10.5649-5656.2003.
- 600 Huang, D.W., Sherman, B.T., and Lempicki, R.A. (2009). Bioinformatics enrichment tools:  
601 paths toward the comprehensive functional analysis of large gene lists. *Nucleic acids*  
602 *research* 37(1), 1-13.
- 603 Hubbard, T.J.P., Aken, B.L., Beal, K., Ballester, B., Cáccamo, M., Chen, Y., et al. (2007).  
604 Ensembl 2007. *Nucleic acids research* 35(suppl\_1), D610-D617.
- 605 Hunt, S.E., McLaren, W., Gil, L., Thormann, A., Schuilenburg, H., Sheppard, D., et al.  
606 (2018). Ensembl variation resources. *Database* 2018. doi: 10.1093/database/bay119.
- 607 Islam, M.S., Khan, M.A.-A.-K., Murad, M.W., Karim, M., and Islam, A.B.M.M.K. (2019). In  
608 silico analysis revealed Zika virus miRNAs associated with viral pathogenesis  
609 through alteration of host genes involved in immune response and neurological  
610 functions. *Journal of Medical Virology* 91(9), 1584-1594. doi: 10.1002/jmv.25505.
- 611 Jiang, S., Du, L., and Shi, Z. (2020). An emerging coronavirus causing pneumonia outbreak  
612 in Wuhan, China: calling for developing therapeutic and prophylactic strategies.  
613 *Emerging Microbes & Infections* 9(1), 275-277.
- 614 Kanehisa, M., and Goto, S. (2000). KEGG: kyoto encyclopedia of genes and genomes.  
615 *Nucleic acids research* 28(1), 27-30.
- 616 Kang, S., Brown, H.M., and Hwang, S. (2018). Direct Antiviral Mechanisms of Interferon-  
617 Gamma. *Immune network* 18(5), e33-e33. doi: 10.4110/in.2018.18.e33.
- 618 Kanikarla-Marie, P., and Jain, S.K. (2016). Hyperketonemia and ketosis increase the risk of  
619 complications in type 1 diabetes. *Free radical biology & medicine* 95, 268-277. doi:  
620 10.1016/j.freeradbiomed.2016.03.020.
- 621 Kauffmann, A., Gentleman, R., and Huber, W. (2009). arrayQualityMetrics—a bioconductor  
622 package for quality assessment of microarray data. *Bioinformatics* 25(3), 415-416.
- 623 Kimura, H., Yoshizumi, M., Ishii, H., Oishi, K., and Ryo, A. (2013). Cytokine production  
624 and signaling pathways in respiratory virus infection. *Frontiers in Microbiology*  
625 4(276). doi: 10.3389/fmicb.2013.00276.

- 626 Konno, H., Yamamoto, T., Yamazaki, K., Gohda, J., Akiyama, T., Semba, K., et al. (2009).  
627 TRAF6 Establishes Innate Immune Responses by Activating NF- $\kappa$ B and IRF7 upon  
628 Sensing Cytosolic Viral RNA and DNA. *PLOS ONE* 4(5), e5674. doi:  
629 10.1371/journal.pone.0005674.
- 630 Kovats, S. (2015). Estrogen receptors regulate innate immune cells and signaling pathways.  
631 *Cellular immunology* 294(2), 63-69. doi: 10.1016/j.cellimm.2015.01.018.
- 632 Kozomara, A., Birgaoanu, M., and Griffiths-Jones, S. (2018). miRBase: from microRNA  
633 sequences to function. *Nucleic Acids Research* 47(D1), D155-D162. doi:  
634 10.1093/nar/gky1141.
- 635 Kuleshov, M.V., Jones, M.R., Rouillard, A.D., Fernandez, N.F., Duan, Q., Wang, Z., et al.  
636 (2016). Enrichr: a comprehensive gene set enrichment analysis web server 2016  
637 update. *Nucleic acids research* 44(W1), W90-97. doi: 10.1093/nar/gkw377.
- 638 Lai, F.W., Stephenson, K.B., Mahony, J., and Lichty, B.D. (2014). Human coronavirus OC43  
639 nucleocapsid protein binds microRNA 9 and potentiates NF- $\kappa$ B activation. *Journal of*  
640 *virology* 88(1), 54-65.
- 641 Le Sage, V., Cinti, A., Amorim, R., and Moulard, A.J. (2016). Adapting the Stress Response:  
642 Viral Subversion of the mTOR Signaling Pathway. *Viruses* 8(6), 152. doi:  
643 10.3390/v8060152.
- 644 Lecellier, C.-H., Dunoyer, P., Arar, K., Lehmann-Che, J., Eyquem, S., Himber, C., et al.  
645 (2005). A cellular microRNA mediates antiviral defense in human cells. *Science*  
646 308(5721), 557-560.
- 647 Li, G., Zhou, L., Zhang, C., Shi, Y., Dong, D., Bai, M., et al. (2019). Insulin-Like Growth  
648 Factor 1 Regulates Acute Inflammatory Lung Injury Mediated by Influenza Virus  
649 Infection. *Frontiers in microbiology* 10, 2541-2541. doi: 10.3389/fmicb.2019.02541.
- 650 Li, X., and Zou, X. (2019). An overview of RNA virus-encoded microRNAs. *ExRNA* 1(1),  
651 37-37. doi: 10.1186/s41544-019-0037-6.
- 652 Liao, Y., Wang, J., Jaehnig, E.J., Shi, Z., and Zhang, B. (2019). WebGestalt 2019: gene set  
653 analysis toolkit with revamped UIs and APIs. *Nucleic acids research* 47(W1), W199-  
654 W205.
- 655 Liu, C., Chen, Z., Hu, Y., Ji, H., Yu, D., Shen, W., et al. (2018). Complemented palindromic  
656 small RNAs first discovered from SARS coronavirus. *Genes* 9(9), 442-442.
- 657 Ljungberg, J.K., Kling, J.C., Tran, T.T., and Blumenthal, A. (2019). Functions of the WNT  
658 Signaling Network in Shaping Host Responses to Infection. *Frontiers in Immunology*  
659 10(2521). doi: 10.3389/fimmu.2019.02521.
- 660 Lu, R., Zhao, X., Li, J., Niu, P., Yang, B., Wu, H., et al. (2020). Genomic characterisation  
661 and epidemiology of 2019 novel coronavirus: implications for virus origins and  
662 receptor binding. *The Lancet* 395(10224), 565-574.
- 663 Ma, Y., Wang, C., Xue, M., Fu, F., Zhang, X., Li, L., et al. (2018). The coronavirus  
664 transmissible gastroenteritis virus evades the type I interferon response through  
665 IRE1 $\alpha$ -mediated manipulation of the microRNA miR-30a-5p/SOCS1/3 axis. *Journal*  
666 *of virology* 92(22), e00728-00718.
- 667 Mallick, B., Ghosh, Z., and Chakrabarti, J. (2009). MicroRNome analysis unravels the  
668 molecular basis of SARS infection in bronchoalveolar stem cells. *PloS one* 4(11).
- 669 Mann, M., Wright, P.R., and Backofen, R. (2017). IntaRNA 2.0: enhanced and customizable  
670 prediction of RNA-RNA interactions. *Nucleic acids research* 45(W1), W435-W439.  
671 doi: 10.1093/nar/gkx279.
- 672 Mateo, M., Generous, A., Sinn, P.L., and Cattaneo, R. (2015). Connections matter – how  
673 viruses use cell–cell adhesion components. *Journal of Cell Science* 128(3), 431-439.  
674 doi: 10.1242/jcs.159400.

- 675 Mishra, R., Kumar, A., Ingle, H., and Kumar, H. (2020). The Interplay Between Viral-  
676 Derived miRNAs and Host Immunity During Infection. *Frontiers in Immunology* 10,  
677 3079-3079.
- 678 Mogensen, T.H., and Paludan, S.R. (2001). Molecular pathways in virus-induced cytokine  
679 production. *Microbiology and molecular biology reviews : MMBR* 65(1), 131-150.  
680 doi: 10.1128/MMBR.65.1.131-150.2001.
- 681 Morales, L., Oliveros, J.C., Fernandez-Delgado, R., tenOever, B.R., Enjuanes, L., and Sola, I.  
682 (2017). SARS-CoV-Encoded Small RNAs Contribute to Infection-Associated Lung  
683 Pathology. *Cell host & microbe* 21(3), 344-355. doi: 10.1016/j.chom.2017.01.015.
- 684 NCBI's-genome-browser. (2020). RE: *NCBI's genome browser for human (Homo sapiens) -*  
685 *Genome Data Viewer*.
- 686 NCBI-Gene. (2020). RE: *Gene Links for Nucleotide (Select 1798174254) - Gene - NCBI*.
- 687 NCBI-RefSeq. (2020). RE: *RefSeq: NCBI Reference Sequence Database*.
- 688 NCBI-Virus. (2020). RE: *NCBI Virus*.
- 689 Oldstone, M.B.A., Teijaro, J.R., Walsh, K.B., and Rosen, H. (2013). Dissecting influenza  
690 virus pathogenesis uncovers a novel chemical approach to combat the infection.  
691 *Virology* 435(1), 92-101. doi: 10.1016/j.virol.2012.09.039.
- 692 Oliveros, J. (2018). "An interactive tool for comparing lists with Venn's diagrams (2007-  
693 2015)".
- 694 Otsuka, M., Jing, Q., Georgel, P., New, L., Chen, J., Mols, J., et al. (2007).  
695 Hypersusceptibility to vesicular stomatitis virus infection in Dicer1-deficient mice is  
696 due to impaired miR24 and miR93 expression. *Immunity* 27(1), 123-134.
- 697 Pathan, M., Keerthikumar, S., Chisanga, D., Alessandro, R., Ang, C.-S., Askenase, P., et al.  
698 (2017). A novel community driven software for functional enrichment analysis of  
699 extracellular vesicles data. *Journal of extracellular vesicles* 6(1), 1321455-1321455.
- 700 Pedersen, I.M., Cheng, G., Wieland, S., Volinia, S., Croce, C.M., Chisari, F.V., et al. (2007).  
701 Interferon modulation of cellular microRNAs as an antiviral mechanism. *Nature*  
702 449(7164), 919-922.
- 703 Perez-Llamas, C., and Lopez-Bigas, N. (2011). Gitoools: analysis and visualisation of genomic  
704 data using interactive heat-maps. *PloS one* 6(5).
- 705 Qureshi, A., Thakur, N., Monga, I., Thakur, A., and Kumar, M. (2014). VIRmiRNA: a  
706 comprehensive resource for experimentally validated viral miRNAs and their targets.  
707 *Database (Oxford)* 2014. doi: 10.1093/database/bau103.
- 708 Ren, L.-L., Wang, Y.-M., Wu, Z.-Q., Xiang, Z.-C., Guo, L., Xu, T., et al. (2020).  
709 Identification of a novel coronavirus causing severe pneumonia in human: a  
710 descriptive study. *Chinese medical journal*.
- 711 Santos, S.A.D., and Andrade, D.R.d.J. (2017). HIF-1alpha and infectious diseases: a new  
712 frontier for the development of new therapies. *Revista do Instituto de Medicina*  
713 *Tropical de Sao Paulo* 59, e92-e92. doi: 10.1590/S1678-9946201759092.
- 714 Shen, W., Chen, M., Wei, G., and Li, Y. (2012). MicroRNA prediction using a fixed-order  
715 Markov model based on the secondary structure pattern. *PloS one* 7(10).
- 716 Sherman, B.T., and Lempicki, R.A. (2009). Systematic and integrative analysis of large gene  
717 lists using DAVID bioinformatics resources. *Nature protocols* 4(1), 44-44.
- 718 Shimizu, F., Hooks, J.J., Kahn, C.R., and Notkins, A.L. (1980). Virus-induced decrease of  
719 insulin receptors in cultured human cells. *The Journal of clinical investigation* 66(5),  
720 1144-1151. doi: 10.1172/JCI109944.
- 721 Smyth, G.K. (2005). "Limma: linear models for microarray data." Springer), 397-420.
- 722 Song, L., Liu, H., Gao, S., Jiang, W., and Huang, W. (2010). Cellular microRNAs inhibit  
723 replication of the H1N1 influenza A virus in infected cells. *J Virol* 84(17), 8849-8860.  
724 doi: 10.1128/jvi.00456-10.



- 725 Soroceanu, L., Akhavan, A., and Cobbs, C.S. (2008). Platelet-derived growth factor-alpha  
726 receptor activation is required for human cytomegalovirus infection. *Nature*  
727 455(7211), 391-395. doi: 10.1038/nature07209.
- 728 Stum, A., Quackenbush, J., and Trajanoski, Z. (2002). Genesis: cluster analysis of microarray  
729 data. *Bioinformatics* 18(1), 207-208. doi: 10.1093/bioinformatics/18.1.207.
- 730 Swaine, T., and Dittmar, M.T. (2015). CDC42 Use in Viral Cell Entry Processes by RNA  
731 Viruses. *Viruses* 7(12), 6526-6536. doi: 10.3390/v7122955.
- 732 Tav, C., Tempel, S., Poligny, L., and Tahiri, F. (2016). miRNAFold: a web server for fast  
733 miRNA precursor prediction in genomes. *Nucleic Acids Research* 44(W1), W181-  
734 W184. doi: 10.1093/nar/gkw459.
- 735 Team, R.C. (1999). Writing R extensions. *R Foundation for Statistical Computing*.
- 736 Teoh, C.M., Tan, S.S.L., and Tran, T. (2015). Integrins as Therapeutic Targets for  
737 Respiratory Diseases. *Current molecular medicine* 15(8), 714-734. doi:  
738 10.2174/1566524015666150921105339.
- 739 Trobaugh, D.W., and Klimstra, W.B. (2017). MicroRNA Regulation of RNA Virus  
740 Replication and Pathogenesis. *Trends in molecular medicine* 23(1), 80-93. doi:  
741 10.1016/j.molmed.2016.11.003.
- 742 van Asten, S.D., Raaben, M., Nota, B., and Spaapen, R.M. (2018). Secretome Screening  
743 Reveals Fibroblast Growth Factors as Novel Inhibitors of Viral Replication. *J Virol*  
744 92(16). doi: 10.1128/jvi.00260-18.
- 745 Wang, J., Zheng, X., Peng, Q., Zhang, X., and Qin, Z. (2019). Eph receptors: the bridge  
746 linking host and virus. *Cellular and Molecular Life Sciences*. doi: 10.1007/s00018-  
747 019-03409-6.
- 748 WHO. (2020). *RE: WHO Director-General's opening remarks at the media briefing on*  
749 *COVID-19 - 3 March 2020*.
- 750 Worldometer. (2020). *RE: Coronavirus Cases*.
- 751 Xu, J., Zhao, S., Teng, T., Abdalla, A.E., Zhu, W., Xie, L., et al. (2020). Systematic  
752 Comparison of Two Animal-to-Human Transmitted Human Coronaviruses: SARS-  
753 CoV-2 and SARS-CoV. *Viruses* 12(2), 244-244. doi: 10.3390/v12020244.
- 754 Yordy, B., and Iwasaki, A. (2011). Autophagy in the control and pathogenesis of viral  
755 infection. *Current opinion in virology* 1(3), 196-203. doi:  
756 10.1016/j.coviro.2011.05.016.
- 757 Zheng, K., Kitazato, K., and Wang, Y. (2014). Viruses exploit the function of epidermal  
758 growth factor receptor. *Rev Med Virol* 24(4), 274-286. doi: 10.1002/rmv.1796.
- 759 Zhou, Y., Frey, T.K., and Yang, J.J. (2009). Viral calciomics: interplays between Ca<sup>2+</sup> and  
760 virus. *Cell Calcium* 46(1), 1-17. doi: 10.1016/j.ceca.2009.05.005.
- 761 Zhu, Z., Qi, Y., Ge, A., Zhu, Y., Xu, K., Ji, H., et al. (2014). Comprehensive characterization  
762 of serum microRNA profile in response to the emerging avian influenza A (H7N9)  
763 virus infection in humans. *Viruses* 6(4), 1525-1539. doi: 10.3390/v6041525.

764

765

766

767

768

769

770

771

772

773

774

## 775 **Figure Legends**

776 **Figure 1:** Overall workflow of the whole study.

777 **Figure 2:** Virally induced host miRNAs targeting SARS-CoV and SARS-CoV-2. **A.**  
778 Common host miRNAs and their target genes in SARS-CoV and SARS-CoV-2, **B.** Host  
779 miRNAs and their target genes which uniquely target either SARS-CoV or SARS-CoV-2, **C.**  
780 Venn diagram showing the common and unique host miRNAs targeting SARS-CoV and  
781 SARS-CoV-2, and host miRNAs that have experimental evidences as antiviral miRNA.

782 **Figure 3:** Genome browser view of host miRNAs targeting the regions of **A.** SARS-CoV  
783 (Reference) and **B.** SARS-CoV-2 (Reference) genomes.

784 **Figure 4:** Differences of host miRNA binding profiles, **A.** representing only uncommon  
785 miRNAs binding pattern in 67 different SARS-CoV-2 genomes from 24 different countries,  
786 and **B.** Hierarchical clustering of all miRNAs binding in 67 genomes (upper panel, same  
787 country with same color code) and association of country specific death rates (in color coded  
788 scale) in per million population (lower panel).

789 **Figure 5:** Enrichment analysis and comparison between host miRNA targets induced by  
790 SARS-CoV and SARS-CoV-2 infections. **A.** Heatmap representation of enriched pathways  
791 involved in host defense obtained using Funrich software, **B.** Enriched pathways which might  
792 act as proviral mechanisms obtained using Funrich software. Enrichment of downregulated  
793 host miRNA target genes in SARS-CoV and SARS-CoV-2 using gitools **C.** GO Biological  
794 Process module, **D.** GO Molecular Function module, **E.** KEGG pathway modules.  
795 Significance of enrichment in terms of adjusted p-value ( $< 0.05$ ) is represented in color coded  
796 P-value scale for all heatmaps. Color towards red indicates higher significance and color  
797 towards yellow indicates less significance, while grey means non-significant.

798 **Figure 6:** Genome browser view of viral miRNAs transcribed from the regions of **A. SARS-**  
799 **CoV (Reference) and B. SARS-CoV-2 (Reference) genomes.**

800 **Figure 7:** Enrichment analysis and comparison between the SARS-CoV and SARS-CoV-2  
801 encoded viral miRNAs' target human genes. Functional enrichment using gitools- **A. GO**  
802 **Biological Process module, B. GO Molecular Function module.** Enriched pathways obtained  
803 from- **C. Webgestalt (KEGG and Wikipathways) tool, D. DAVID (KEGG pathways) tool, E.**  
804 **EnrichR (KEGG, Wikipathways, BioPlanet pathways) tool.** Color codes are as in Figure 5.

805 **Figure 8:** Enrichment analysis and comparison between the enriched pathways of **A. SARS-**  
806 **CoV and B. SARS-CoV-2,** encoded viral miRNAs' downregulated target genes, obtained  
807 using EnrichR (KEGG, Wikipathways, BioPlanet pathways) tool. P-value scale is utilized for  
808 all in a bar graph. Higher the bar height, the more significant an enriched term is.

809

## 810 **Supplementary Figure Legend**

811 **Supplementary figure 1:** SARS-CoV-2 miRNA targeted Genes involved in significant  
812 functions/pathways- **A. Autophagy (Figure 7A, 7E), B. Heart development (Figure 7A), C.**  
813 **Brain development (Figure 7A), D. Insulin signaling pathway (Figure 7C, 7D, 7E), E.**  
814 **Interferon type 1 signaling pathway (Figure 7E), F. HIF-1 signaling pathway (Figure 7E).**

815

## 816 **List of Supplementary files**

817 **Supplementary file 1:** List of SARS-CoV-2 isolates used.

818 **Supplementary file 2:** List of Human miRNAs targeting SARS-COV (Reference) and  
819 SARS-CoV-2 (Reference) genes.

820 **Supplementary file 3:** List of predicted viral miRNAs of SARS-CoV (Reference) and  
821 SARS-CoV-2 (Reference).

822 **Supplementary file 4:** List of human target genes targeted by SARS-CoV (Reference) and  
823 SARS-CoV-2 (Reference) encoded miRNAs.

824 **Supplementary file 5:** Downregulated human target genes of SARS-CoV (Reference) and  
825 SARS-CoV-2 (Reference) encoded miRNAs.

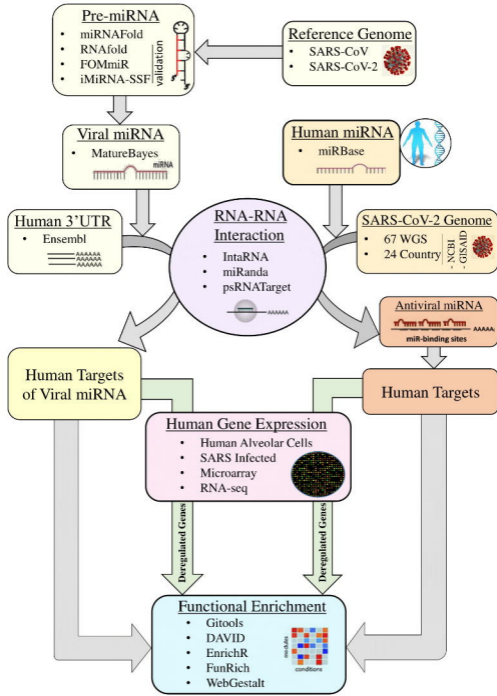

**A.**

bioRxiv preprint doi: <https://doi.org/10.1101/2020.05.06.081026>; this version posted May 8, 2020. The copyright holder for this preprint (which was not certified by peer review) is the author/funder, who has granted bioRxiv a license to display the preprint in perpetuity. It is made available under aCC-BY-NC-ND 4.0 International license.

| SARS-CoV-2      | Present | Absent |
|-----------------|---------|--------|
| hsa-miR-1307-3p | ORF1ab  | ORF1ab |
| hsa-miR-1304-5p | ORF1ab  | ORF1ab |
| hsa-miR-138-5p  | ORF1ab  | ORF1ab |
| hsa-miR-193a-5p | ORF1ab  | ORF1ab |
| hsa-miR-2277-3p | ORF1ab  | ORF1ab |
| hsa-miR-3154    | ORF1ab  | ORF1ab |
| hsa-miR-323a-5p | ORF1ab  | ORF1ab |
| hsa-miR-365a-5p | ORF1ab  | ORF1ab |
| hsa-miR-4502    | ORF1ab  | ORF1ab |
| hsa-miR-494-5p  | ORF1ab  | ORF1ab |
| hsa-miR-6515-5p | ORF1ab  | ORF1ab |
| hsa-miR-6812-5p | ORF1ab  | ORF1ab |
| hsa-miR-6838-5p | ORF1ab  | ORF1ab |
| hsa-miR-6721-5p | ORF1ab  | M      |
| hsa-miR-6759-5p | ORF1ab  | S      |
| hsa-miR-6817-5p | ORF1ab  | N      |
| hsa-miR-4436a   | 3a      | ORF7a  |
| hsa-miR-939-5p  | 3a      | ORF1ab |
| hsa-miR-6820-5p | ORF6    | M      |
| hsa-miR-6732-5p | ORF7b   | ORF3a  |
| hsa-miR-7850-5p | ORF8b   | S      |
| hsa-miR-6876-5p | ORF9a/N | N      |
| hsa-miR-1202    | ORF9b   | ORF1ab |
| hsa-miR-3935    | M       | ORF1ab |
| hsa-miR-4259    | S       | N      |
| hsa-miR-4732-5p | S       | ORF8   |
| hsa-miR-624-5p  | S       | ORF1ab |

**B.**

| SARS-CoV          | SARS-CoV-2 | Present | Absent |
|-------------------|------------|---------|--------|
| hsa-miR-3150b-3p  | SUTR       |         |        |
| hsa-miR-1304-3p   | 3UTR       |         |        |
| hsa-let-7a-5p     | ORF1ab     |         |        |
| hsa-miR-1204      | ORF1ab     |         |        |
| hsa-miR-1258      | ORF1ab     |         |        |
| hsa-miR-1276      | ORF1ab     |         |        |
| hsa-miR-1471      | ORF1ab     |         |        |
| hsa-miR-154-5p    | ORF1ab     |         |        |
| hsa-miR-185-5p    | ORF1ab     |         |        |
| hsa-miR-196a-5p   | ORF1ab     |         |        |
| hsa-miR-19b-1-5p  | ORF1ab     |         |        |
| hsa-miR-222-5p    | ORF1ab     |         |        |
| hsa-miR-2682-5p   | ORF1ab     |         |        |
| hsa-miR-30c-1-3p  | ORF1ab     |         |        |
| hsa-miR-3152-5p   | ORF1ab     |         |        |
| hsa-miR-323b-5p   | ORF1ab     |         |        |
| hsa-miR-34b-5p    | ORF1ab     |         |        |
| hsa-miR-3650      | ORF1ab     |         |        |
| hsa-miR-365b-5p   | ORF1ab     |         |        |
| hsa-miR-371a-3p   | ORF1ab     |         |        |
| hsa-miR-375-3p    | ORF1ab     |         |        |
| hsa-miR-425-3p    | ORF1ab     |         |        |
| hsa-miR-432-5p    | ORF1ab     |         |        |
| hsa-miR-4453      | ORF1ab     |         |        |
| hsa-miR-4515      | ORF1ab     |         |        |
| hsa-miR-4669      | ORF1ab     |         |        |
| hsa-miR-4695-5p   | ORF1ab     |         |        |
| hsa-miR-4703-3p   | ORF1ab     |         |        |
| hsa-miR-4709-3p   | ORF1ab     |         |        |
| hsa-miR-4711-5p   | ORF1ab     |         |        |
| hsa-miR-4725-3p   | ORF1ab     |         |        |
| hsa-miR-4726-5p   | ORF1ab     |         |        |
| hsa-miR-4733-3p   | ORF1ab     |         |        |
| hsa-miR-4748      | ORF1ab     |         |        |
| hsa-miR-4769-5p   | ORF1ab     |         |        |
| hsa-miR-4771      | ORF1ab     |         |        |
| hsa-miR-4772-3p   | ORF1ab     |         |        |
| hsa-miR-4778-3p   | ORF1ab     |         |        |
| hsa-miR-4796-3p   | ORF1ab     |         |        |
| hsa-miR-497-3p    | ORF1ab     |         |        |
| hsa-miR-511-5p    | ORF1ab     |         |        |
| hsa-miR-513c-5p   | ORF1ab     |         |        |
| hsa-miR-5193      | ORF1ab     |         |        |
| hsa-miR-519b-3p   | ORF1ab     |         |        |
| hsa-miR-5739      | ORF1ab     |         |        |
| hsa-miR-6511b-5p  | ORF1ab     |         |        |
| hsa-miR-6513-3p   | ORF1ab     |         |        |
| hsa-miR-6514-3p   | ORF1ab     |         |        |
| hsa-miR-8057      | SUTR       |         |        |
| hsa-let-7c-3p     | ORF1ab     |         |        |
| hsa-miR-103a-1-5p | ORF1ab     |         |        |
| hsa-miR-12127     | ORF1ab     |         |        |
| hsa-miR-1229-5p   | ORF1ab     |         |        |
| hsa-miR-17-5p     | ORF1ab     |         |        |
| hsa-miR-182-5p    | ORF1ab     |         |        |
| hsa-miR-1843      | ORF1ab     |         |        |
| hsa-miR-197-5p    | ORF1ab     |         |        |
| hsa-miR-20b-5p    | ORF1ab     |         |        |
| hsa-miR-3120-5p   | ORF1ab     |         |        |
| hsa-miR-3190-3p   | ORF1ab     |         |        |
| hsa-miR-3191-3p   | ORF1ab     |         |        |
| hsa-miR-3202      | ORF1ab     |         |        |
| hsa-miR-3666      | ORF1ab     |         |        |
| hsa-miR-3689a-5p  | ORF1ab     |         |        |
| hsa-miR-3689b-5p  | ORF1ab     |         |        |
| hsa-miR-3689e     | ORF1ab     |         |        |
| hsa-miR-378c      | ORF1ab     |         |        |
| hsa-miR-3914      | ORF1ab     |         |        |
| hsa-miR-3934-5p   | ORF1ab     |         |        |
| hsa-miR-3976      | ORF1ab     |         |        |
| hsa-miR-4436b-3p  | ORF1ab     |         |        |
| hsa-miR-4520-5p   | ORF1ab     |         |        |
| hsa-miR-4524b-5p  | ORF1ab     |         |        |
| hsa-miR-4722-5p   | ORF1ab     |         |        |
| hsa-miR-4758-5p   | ORF1ab     |         |        |
| hsa-miR-498-5p    | ORF1ab     |         |        |
| hsa-miR-4999-3p   | ORF1ab     |         |        |
| hsa-miR-549a-5p   | ORF1ab     |         |        |
| hsa-miR-5582-5p   | ORF1ab     |         |        |
| hsa-miR-5586-5p   | ORF1ab     |         |        |
| hsa-miR-5591-5p   | ORF1ab     |         |        |
| hsa-miR-6076      | ORF1ab     |         |        |
| hsa-miR-6134      | ORF1ab     |         |        |
| hsa-miR-628-3p    | ORF1ab     |         |        |
| hsa-miR-637       | ORF1ab     |         |        |
| hsa-miR-656-5p    | ORF1ab     |         |        |
| hsa-miR-6736-5p   | ORF1ab     |         |        |
| hsa-miR-6738-5p   | ORF1ab     |         |        |
| hsa-miR-6740-5p   | ORF1ab     |         |        |
| hsa-miR-6741-5p   | ORF1ab     |         |        |
| hsa-miR-6769b-5p  | ORF1ab     |         |        |
| hsa-miR-6772-5p   | ORF1ab     |         |        |
| hsa-miR-6818-5p   | ORF1ab     |         |        |
| hsa-miR-6831-5p   | ORF1ab     |         |        |
| hsa-miR-6834-5p   | ORF1ab     |         |        |
| hsa-miR-6837-3p   | ORF1ab     |         |        |

**C.**

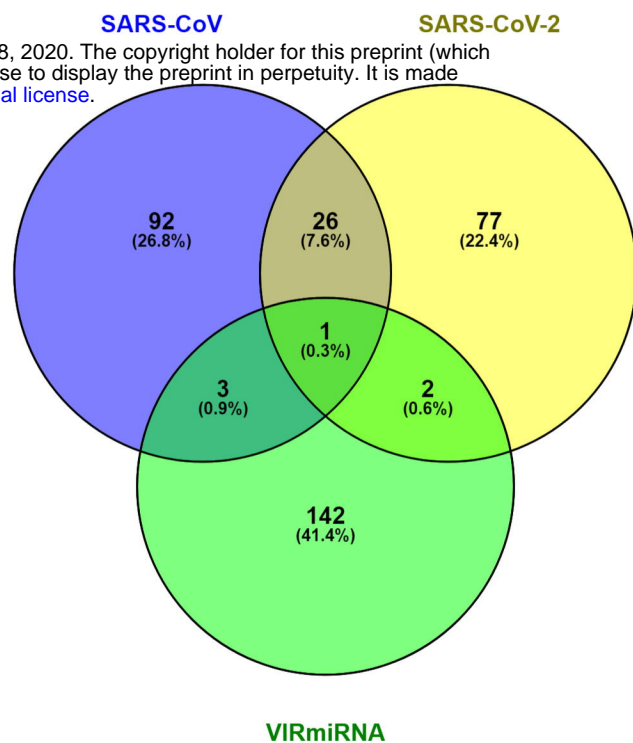

| SARS-CoV          | SARS-CoV-2 | Present | Absent |
|-------------------|------------|---------|--------|
| hsa-miR-654-3p    | ORF1ab     |         |        |
| hsa-miR-654-5p    | ORF1ab     |         |        |
| hsa-miR-655-3p    | ORF1ab     |         |        |
| hsa-miR-6731-5p   | ORF1ab     |         |        |
| hsa-miR-6757-5p   | ORF1ab     |         |        |
| hsa-miR-6780a-5p  | ORF1ab     |         |        |
| hsa-miR-6793-5p   | ORF1ab     |         |        |
| hsa-miR-6804-5p   | ORF1ab     |         |        |
| hsa-miR-6815-5p   | ORF1ab     |         |        |
| hsa-miR-6838-3p   | ORF1ab     |         |        |
| hsa-miR-6875-5p   | ORF1ab     |         |        |
| hsa-miR-6878-5p   | ORF1ab     |         |        |
| hsa-miR-6884-5p   | ORF1ab     |         |        |
| hsa-miR-7112-3p   | ORF1ab     |         |        |
| hsa-miR-7154-3p   | ORF1ab     |         |        |
| hsa-miR-7158-5p   | ORF1ab     |         |        |
| hsa-miR-7161-5p   | ORF1ab     |         |        |
| hsa-miR-877-3p    | ORF1ab     |         |        |
| hsa-miR-9851-5p   | ORF1ab     |         |        |
| hsa-miR-4747-5p   | 3a         |         |        |
| hsa-miR-6504-5p   | 3a         |         |        |
| hsa-miR-4524a-5p  | ORF6       |         |        |
| hsa-miR-3131      | ORF7b      |         |        |
| hsa-miR-6739-3p   | ORF7b      |         |        |
| hsa-miR-8055      | ORF8b      |         |        |
| hsa-miR-216a-3p   | ORF9a/N    |         |        |
| hsa-miR-3192-5p   | ORF9a/N    |         |        |
| hsa-miR-337-3p    | ORF9a/N    |         |        |
| hsa-miR-655-5p    | ORF9a/N    |         |        |
| hsa-miR-198       | ORF9b      |         |        |
| hsa-miR-7160-5p   | ORF9b      |         |        |
| hsa-miR-550a-3-5p | M          |         |        |
| hsa-miR-550a-5p   | M          |         |        |
| hsa-miR-550b-2-5p | M          |         |        |
| hsa-miR-652-3p    | M          |         |        |
| hsa-miR-382-5p    | S          |         |        |
| hsa-miR-3934-3p   | S          |         |        |
| hsa-miR-4659a-5p  | S          |         |        |
| hsa-miR-4659b-5p  | S          |         |        |
| hsa-miR-486-5p    | S          |         |        |
| hsa-miR-5572      | S          |         |        |
| hsa-miR-6081      | S          |         |        |
| hsa-miR-6127      | S          |         |        |
| hsa-miR-622       | S          |         |        |
| hsa-miR-6775-5p   | S          |         |        |
| hsa-miR-6830-3p   | S          |         |        |
| hsa-miR-7843-5p   | S          |         |        |
| hsa-miR-6853-5p   | ORF1ab     |         |        |
| hsa-miR-6861-5p   | ORF1ab     |         |        |
| hsa-miR-6893-5p   | ORF1ab     |         |        |
| hsa-miR-7-5p      | ORF1ab     |         |        |
| hsa-miR-8060      | ORF1ab     |         |        |
| hsa-miR-8080      | ORF1ab     |         |        |
| hsa-miR-8082      | ORF1ab     |         |        |
| hsa-miR-892c-5p   | ORF1ab     |         |        |
| hsa-miR-96-3p     | ORF1ab     |         |        |
| hsa-miR-3132      | ORF3a      |         |        |
| hsa-miR-6751-5p   | ORF3a      |         |        |
| hsa-miR-3135b     | ORF7a      |         |        |
| hsa-miR-4684-3p   | ORF7a      |         |        |
| hsa-miR-12129     | ORF8       |         |        |
| hsa-miR-2392      | ORF8       |         |        |
| hsa-miR-23b-5p    | ORF8       |         |        |
| hsa-miR-5047      | ORF8       |         |        |
| hsa-miR-12119     | N          |         |        |
| hsa-miR-208a-5p   | N          |         |        |
| hsa-miR-3155a     | N          |         |        |
| hsa-miR-506-3p    | N          |         |        |
| hsa-miR-6882-3p   | N          |         |        |
| hsa-miR-8066      | N          |         |        |
| hsa-miR-92a-2-5p  | N          |         |        |
| hsa-miR-11401     | S          |         |        |
| hsa-miR-125a-3p   | S          |         |        |
| hsa-miR-4510      | S          |         |        |
| hsa-miR-5683      | S          |         |        |
| hsa-miR-597-3p    | S          |         |        |
| hsa-miR-6792-5p   | S          |         |        |
| hsa-miR-744-3p    | S          |         |        |

**A.**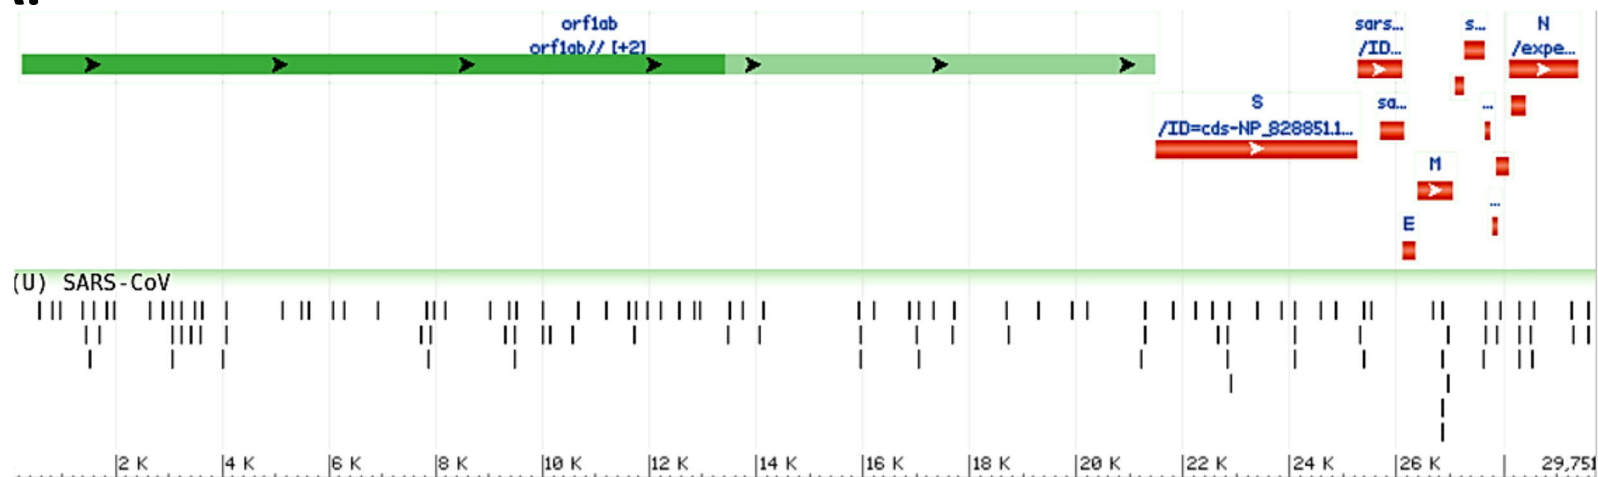**B.**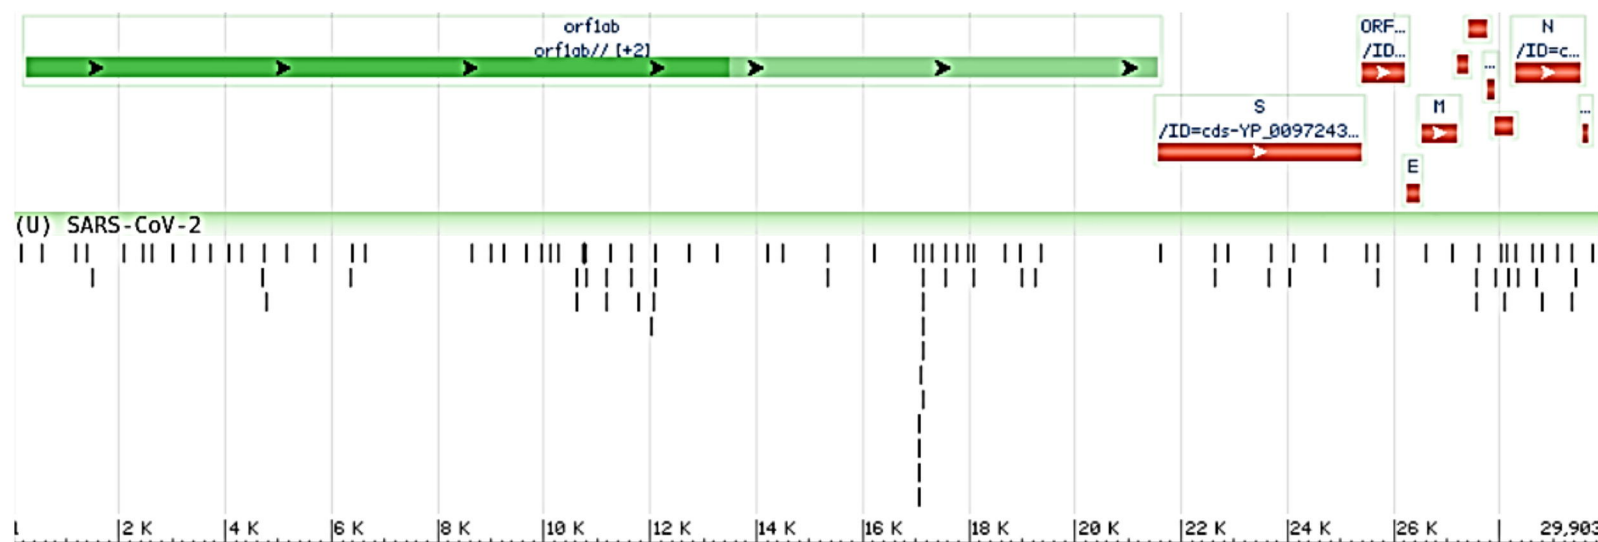



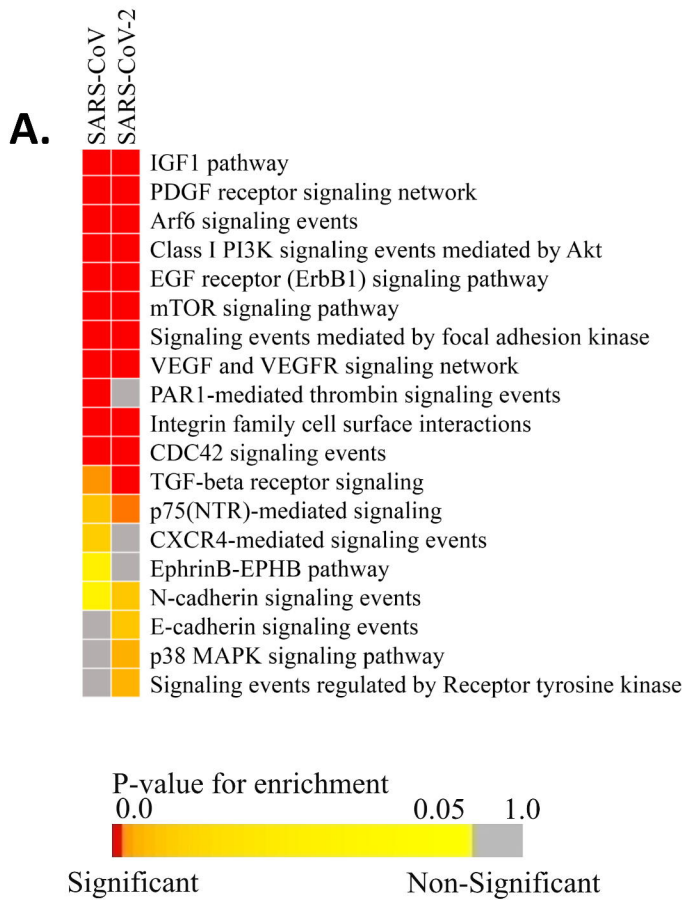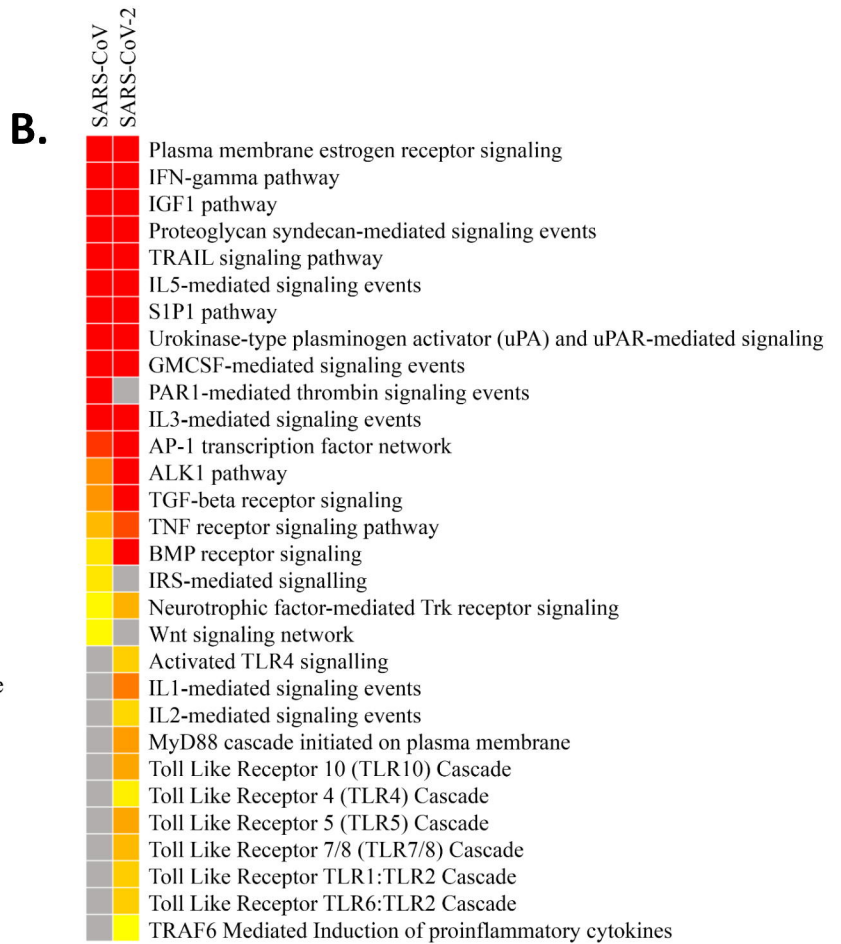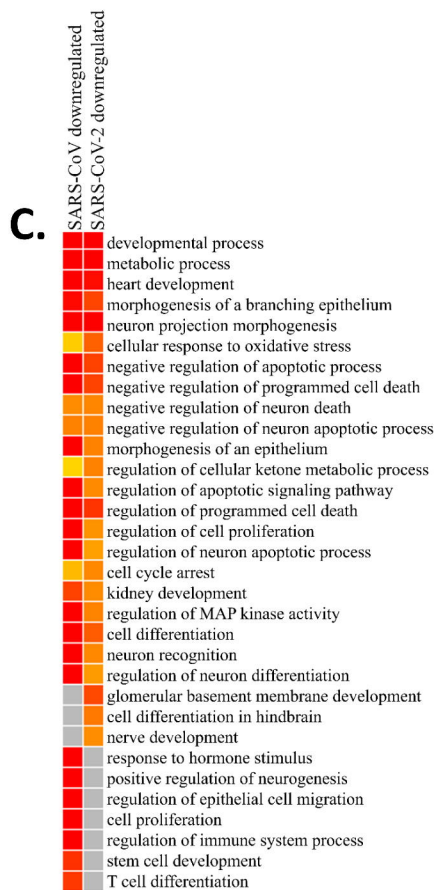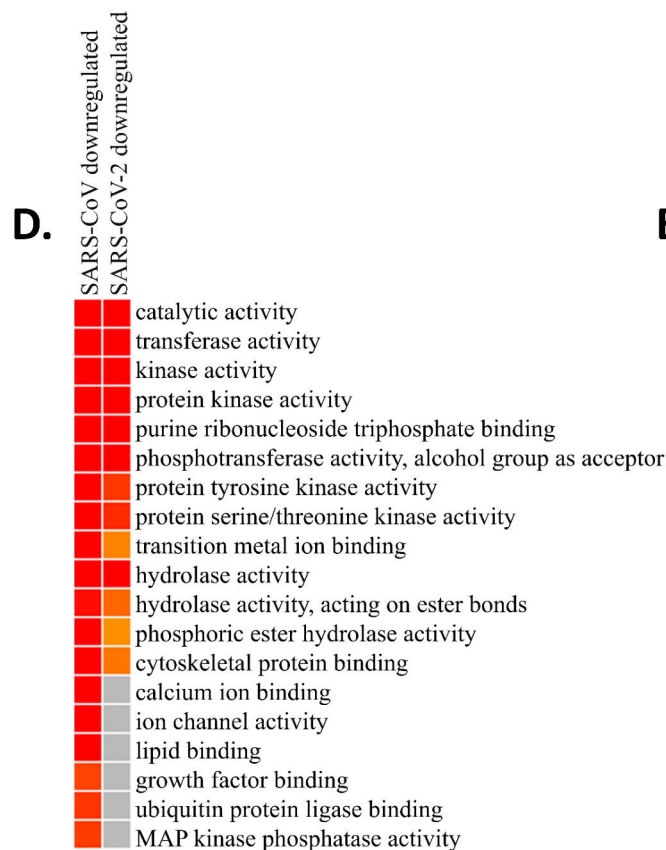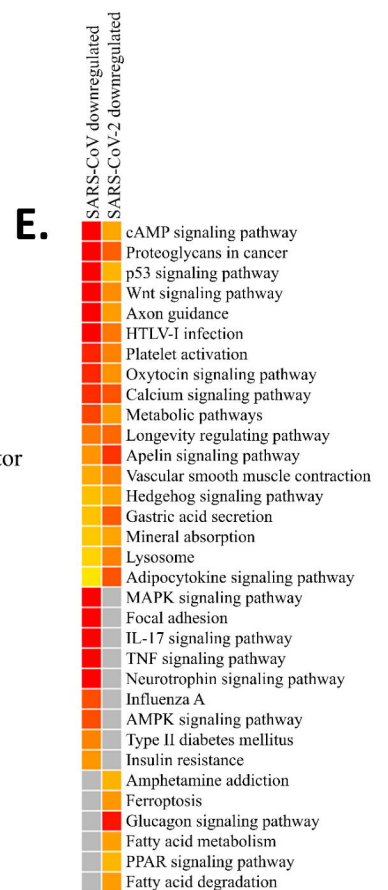



**A.**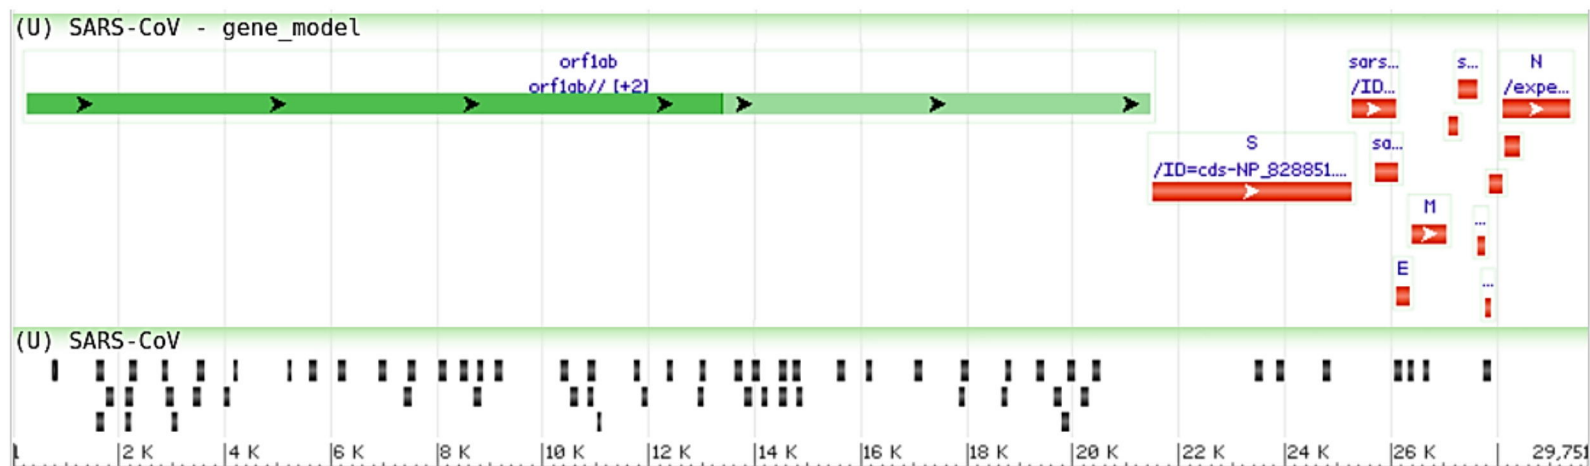**B.**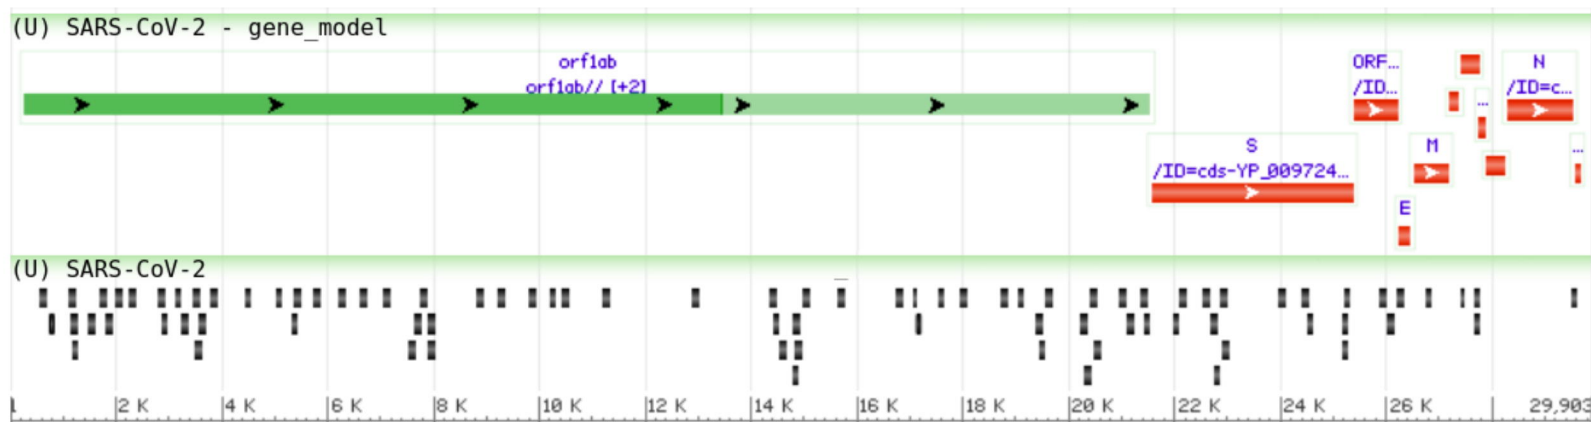

SARS-CoV Targets SARS-CoV-2 Targets

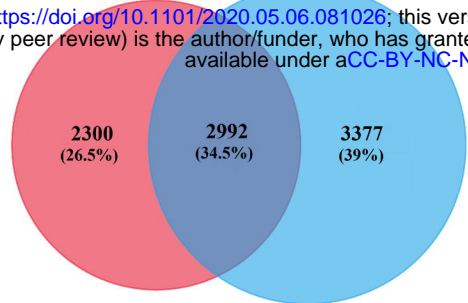

**A.**

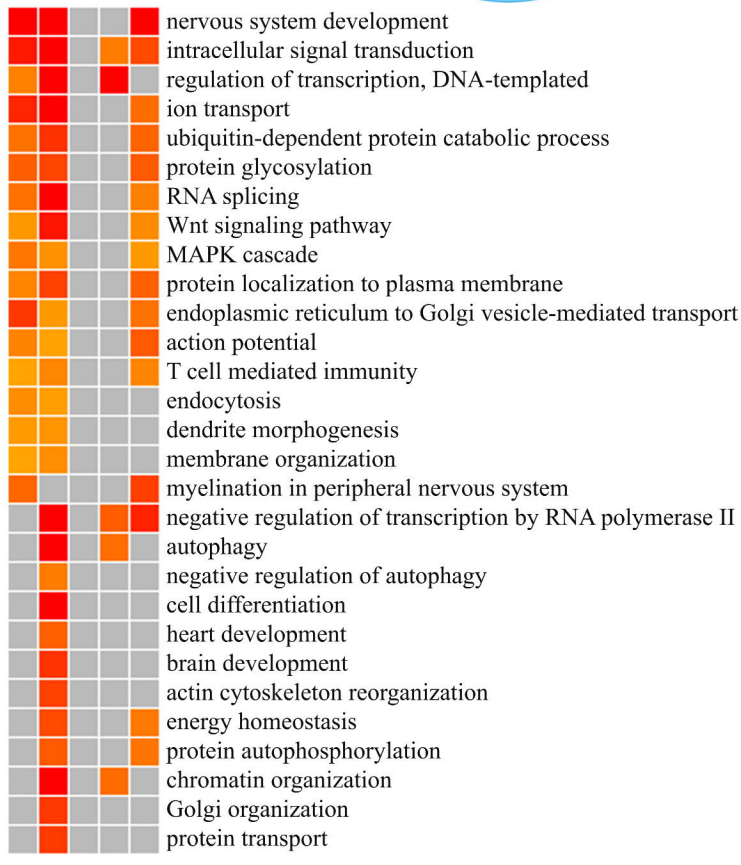

**B.**

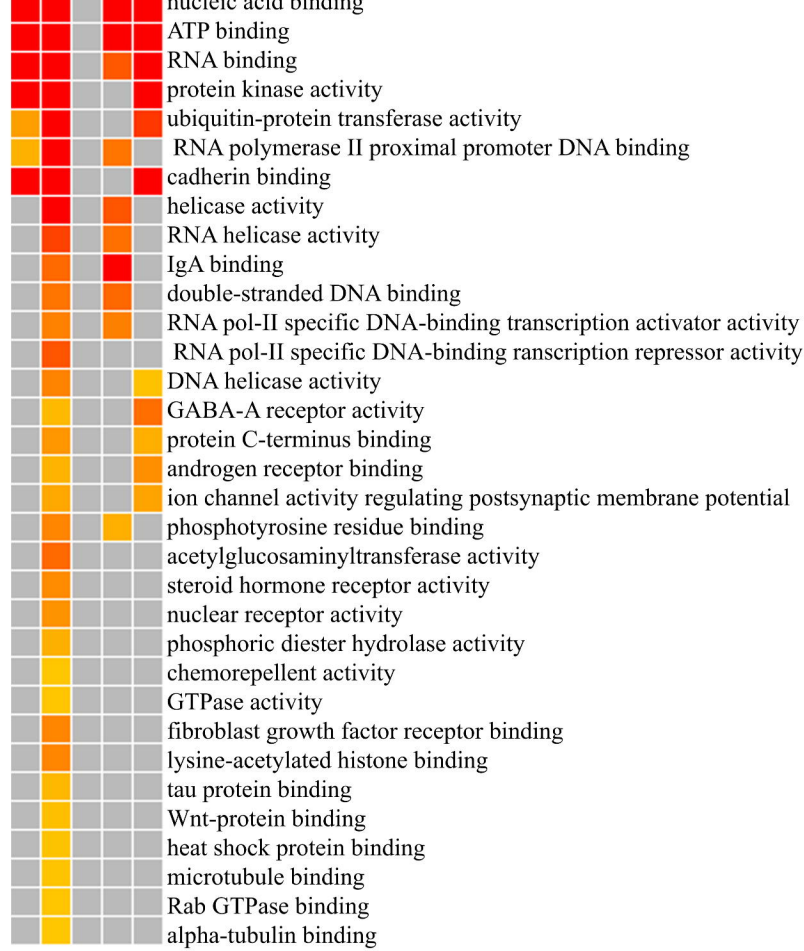

**C.**

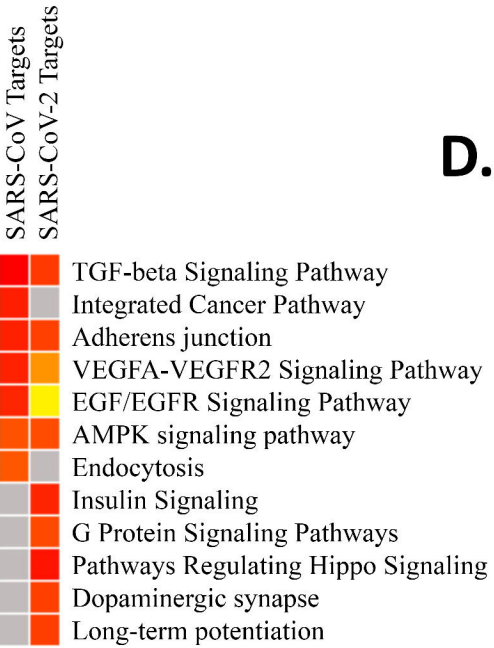

**D.**

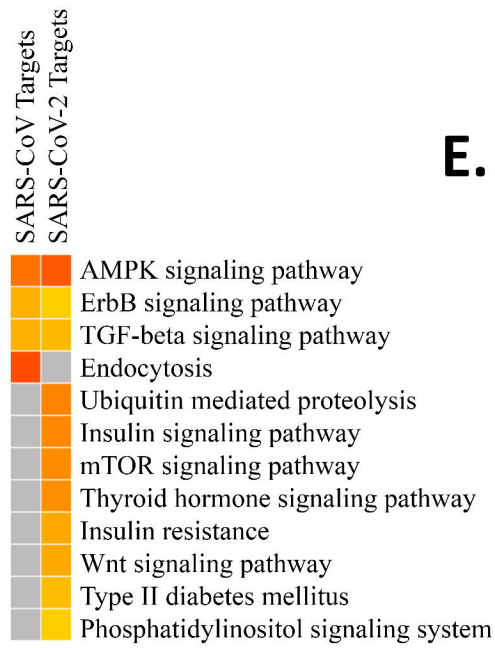

**E.**

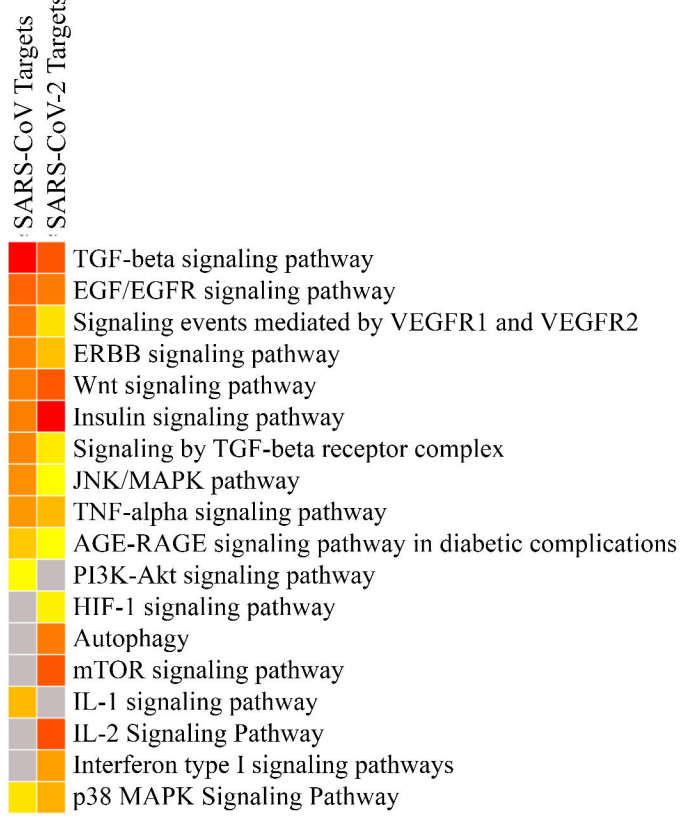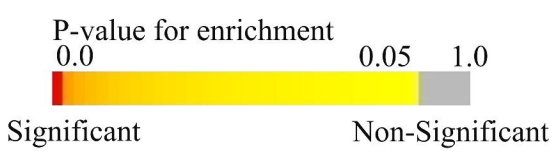

**A.**

Enriched pathways

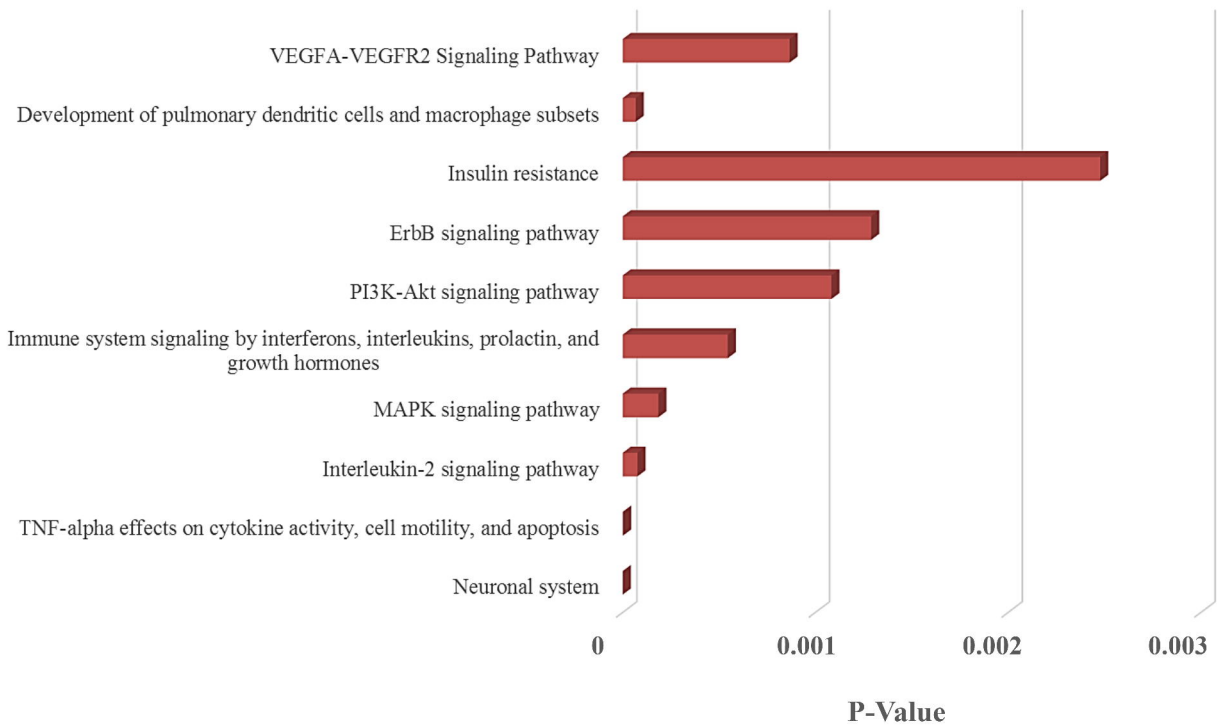**B.**

Enriched pathways

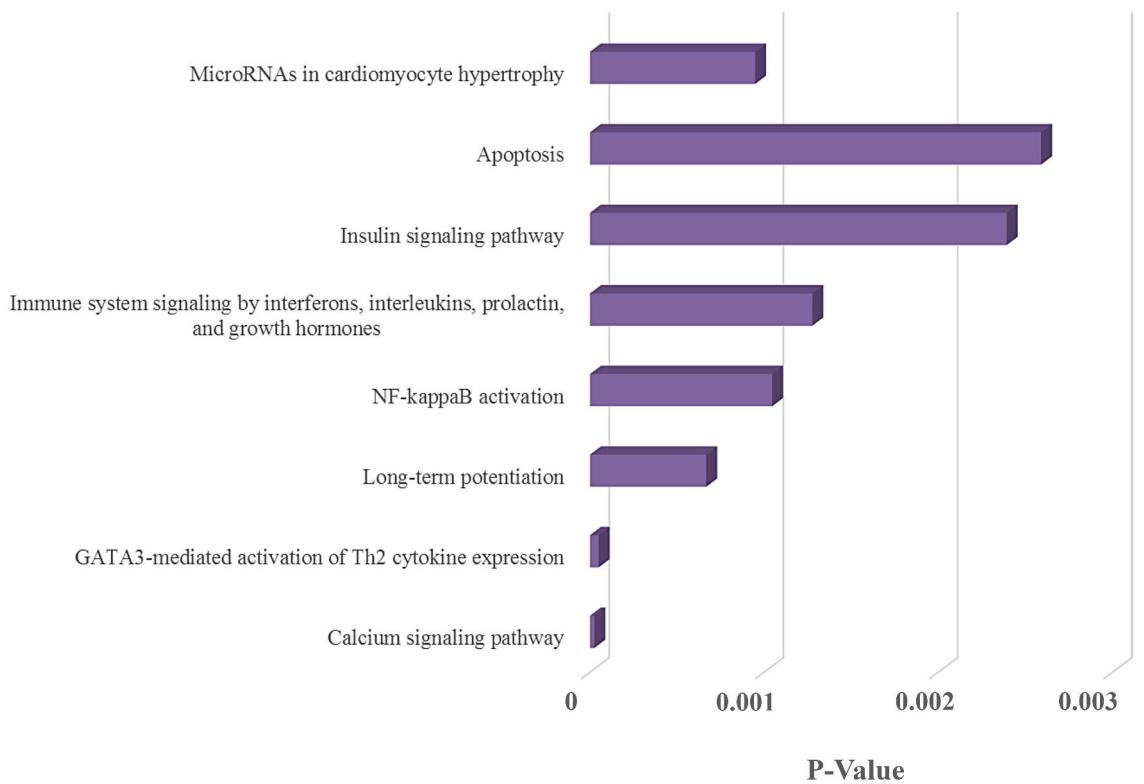

Source: https://www.biorxiv.org/content/10.1101/2020.05.06.081026v1.full.pdf
