# Supplementary material for: Epigenetic regulator miRNA pattern differences among SARS-CoV, SARS-CoV-2 and SARS-CoV-2 world-wide isolates delineated the mystery behind the epic pathogenicity and distinct clinical characteristics of pandemic COVID-19
Source: bioRxiv preprint, doi:10.1101/2020.05.06.081026, version 1 (2020-05-07)
Supplement: Supplementary File 4 [file 081026_file14.xlsx]

## Sheet: Sup_4
Supplementary file 4: List of human target genes targeted by SARS-CoV (Reference) and SARS-CoV-2 (Reference) encoded miRNAs.
SARS-CoV Targets	Gene name		SARS-CoV-2 Targets	Gene name
ENSG00000000457	SCYL3		ENSG00000000003	TSPAN6
ENSG00000000460	C1orf112		ENSG00000000457	SCYL3
ENSG00000003056	M6PR		ENSG00000000460	C1orf112
ENSG00000003147	ICA1		ENSG00000001084	GCLC
ENSG00000003393	ALS2		ENSG00000001167	NFYA
ENSG00000003402	CFLAR		ENSG00000001461	NIPAL3
ENSG00000004139	SARM1		ENSG00000001561	ENPP4
ENSG00000004455	AK2		ENSG00000001626	CFTR
ENSG00000004468	CD38		ENSG00000001629	ANKIB1
ENSG00000004478	FKBP4		ENSG00000001631	KRIT1
ENSG00000004534	RBM6		ENSG00000002016	RAD52
ENSG00000004799	PDK4		ENSG00000002834	LASP1
ENSG00000004848	ARX		ENSG00000002933	TMEM176A
ENSG00000004866	ST7		ENSG00000003096	KLHL13
ENSG00000004897	CDC27		ENSG00000003402	CFLAR
ENSG00000004961	HCCS		ENSG00000003509	NDUFAF7
ENSG00000005007	UPF1		ENSG00000003987	MTMR7
ENSG00000005100	DHX33		ENSG00000004139	SARM1
ENSG00000005108	THSD7A		ENSG00000004468	CD38
ENSG00000005175	RPAP3		ENSG00000004478	FKBP4
ENSG00000005187	ACSM3		ENSG00000004766	VPS50
ENSG00000005189	REXO5		ENSG00000004846	ABCB5
ENSG00000005194	CIAPIN1		ENSG00000004866	ST7
ENSG00000005339	CREBBP		ENSG00000004897	CDC27
ENSG00000005379	TSPOAP1		ENSG00000005020	SKAP2
ENSG00000005436	GCFC2		ENSG00000005059	MCUB
ENSG00000005471	ABCB4		ENSG00000005100	DHX33
ENSG00000005483	KMT2E		ENSG00000005108	THSD7A
ENSG00000005486	RHBDD2		ENSG00000005249	PRKAR2B
ENSG00000005700	IBTK		ENSG00000005302	MSL3
ENSG00000005889	ZFX		ENSG00000005339	CREBBP
ENSG00000006042	TMEM98		ENSG00000005436	GCFC2
ENSG00000006071	ABCC8		ENSG00000005469	CROT
ENSG00000006125	AP2B1		ENSG00000005483	KMT2E
ENSG00000006283	CACNA1G		ENSG00000005700	IBTK
ENSG00000006451	RALA		ENSG00000005844	ITGAL
ENSG00000006459	KDM7A		ENSG00000005889	ZFX
ENSG00000006468	ETV1		ENSG00000005893	LAMP2
ENSG00000006530	AGK		ENSG00000005981	ASB4
ENSG00000006534	ALDH3B1		ENSG00000006042	TMEM98
ENSG00000006607	FARP2		ENSG00000006047	YBX2
ENSG00000006695	COX10		ENSG00000006071	ABCC8
ENSG00000006740	ARHGAP44		ENSG00000006283	CACNA1G
ENSG00000006744	ELAC2		ENSG00000006451	RALA
ENSG00000006747	SCIN		ENSG00000006459	KDM7A
ENSG00000006756	ARSD		ENSG00000006468	ETV1
ENSG00000006831	ADIPOR2		ENSG00000006530	AGK
ENSG00000007047	MARK4		ENSG00000006555	TTC22
ENSG00000007202	KIAA0100		ENSG00000006576	PHTF2
ENSG00000007306	CEACAM7		ENSG00000006625	GGCT
ENSG00000007350	TKTL1		ENSG00000006634	DBF4
ENSG00000007392	LUC7L		ENSG00000006652	IFRD1
ENSG00000007541	PIGQ		ENSG00000006695	COX10
ENSG00000007944	MYLIP		ENSG00000006740	ARHGAP44
ENSG00000008086	CDKL5		ENSG00000006747	SCIN
ENSG00000008277	ADAM22		ENSG00000006757	PNPLA4
ENSG00000008294	SPAG9		ENSG00000006837	CDKL3
ENSG00000008311	AASS		ENSG00000007047	MARK4
ENSG00000008952	SEC62		ENSG00000007168	PAFAH1B1
ENSG00000009307	CSDE1		ENSG00000007306	CEACAM7
ENSG00000009765	IYD		ENSG00000007372	PAX6
ENSG00000009780	FAM76A		ENSG00000007923	DNAJC11
ENSG00000009830	POMT2		ENSG00000007944	MYLIP
ENSG00000009844	VTA1		ENSG00000008086	CDKL5
ENSG00000009954	BAZ1B		ENSG00000008282	SYPL1
ENSG00000010244	ZNF207		ENSG00000008294	SPAG9
ENSG00000010256	UQCRC1		ENSG00000008311	AASS
ENSG00000010404	IDS		ENSG00000008324	SS18L2
ENSG00000010704	HFE		ENSG00000008441	NFIX
ENSG00000010810	FYN		ENSG00000008513	ST3GAL1
ENSG00000011028	MRC2		ENSG00000008853	RHOBTB2
ENSG00000011114	BTBD7		ENSG00000008952	SEC62
ENSG00000011198	ABHD5		ENSG00000009307	CSDE1
ENSG00000011201	ANOS1		ENSG00000009335	UBE3C
ENSG00000011258	MBTD1		ENSG00000009413	REV3L
ENSG00000011275	RNF216		ENSG00000009694	TENM1
ENSG00000011295	TTC19		ENSG00000009765	IYD
ENSG00000011376	LARS2		ENSG00000009780	FAM76A
ENSG00000011405	PIK3C2A		ENSG00000009954	BAZ1B
ENSG00000011454	RABGAP1		ENSG00000010017	RANBP9
ENSG00000011523	CEP68		ENSG00000010072	SPRTN
ENSG00000012048	BRCA1		ENSG00000010219	DYRK4
ENSG00000012061	ERCC1		ENSG00000010244	ZNF207
ENSG00000012171	SEMA3B		ENSG00000010292	NCAPD2
ENSG00000012174	MBTPS2		ENSG00000010310	GIPR
ENSG00000012232	EXTL3		ENSG00000010404	IDS
ENSG00000012822	CALCOCO1		ENSG00000010818	HIVEP2
ENSG00000012983	MAP4K5		ENSG00000011021	CLCN6
ENSG00000013016	EHD3		ENSG00000011114	BTBD7
ENSG00000013288	MAN2B2		ENSG00000011198	ABHD5
ENSG00000013293	SLC7A14		ENSG00000011201	ANOS1
ENSG00000013375	PGM3		ENSG00000011258	MBTD1
ENSG00000013583	HEBP1		ENSG00000011295	TTC19
ENSG00000014123	UFL1		ENSG00000011332	DPF1
ENSG00000014138	POLA2		ENSG00000011376	LARS2
ENSG00000014824	SLC30A9		ENSG00000011405	PIK3C2A
ENSG00000015133	CCDC88C		ENSG00000011465	DCN
ENSG00000015475	BID		ENSG00000011485	PPP5C
ENSG00000015479	MATR3		ENSG00000011523	CEP68
ENSG00000015520	NPC1L1		ENSG00000011566	MAP4K3
ENSG00000015568	RGPD5		ENSG00000012048	BRCA1
ENSG00000015592	STMN4		ENSG00000012174	MBTPS2
ENSG00000015676	NUDCD3		ENSG00000012211	PRICKLE3
ENSG00000016391	CHDH		ENSG00000012504	NR1H4
ENSG00000016402	IL20RA		ENSG00000012983	MAP4K5
ENSG00000016602	CLCA4		ENSG00000013288	MAN2B2
ENSG00000017427	IGF1		ENSG00000013293	SLC7A14
ENSG00000017797	RALBP1		ENSG00000013375	PGM3
ENSG00000018236	CNTN1		ENSG00000013523	ANGEL1
ENSG00000018280	SLC11A1		ENSG00000013561	RNF14
ENSG00000018510	AGPS		ENSG00000013588	GPRC5A
ENSG00000019485	PRDM11		ENSG00000013619	MAMLD1
ENSG00000019549	SNAI2		ENSG00000013810	TACC3
ENSG00000019582	CD74		ENSG00000014123	UFL1
ENSG00000019991	HGF		ENSG00000014914	MTMR11
ENSG00000021574	SPAST		ENSG00000014919	COX15
ENSG00000021776	AQR		ENSG00000015153	YAF2
ENSG00000022355	GABRA1		ENSG00000015479	MATR3
ENSG00000022556	NLRP2		ENSG00000015568	RGPD5
ENSG00000022567	SLC45A4		ENSG00000017260	ATP2C1
ENSG00000022976	ZNF839		ENSG00000017427	IGF1
ENSG00000023228	NDUFS1		ENSG00000017797	RALBP1
ENSG00000023287	RB1CC1		ENSG00000018189	RUFY3
ENSG00000023516	AKAP11		ENSG00000018236	CNTN1
ENSG00000023909	GCLM		ENSG00000018510	AGPS
ENSG00000024526	DEPDC1		ENSG00000018625	ATP1A2
ENSG00000025039	RRAGD		ENSG00000019102	VSIG2
ENSG00000025156	HSF2		ENSG00000019505	SYT13
ENSG00000025800	KPNA6		ENSG00000019991	HGF
ENSG00000026025	VIM		ENSG00000020181	ADGRA2
ENSG00000026036	RTEL1-TNFRSF6B		ENSG00000020577	SAMD4A
ENSG00000026508	CD44		ENSG00000020922	MRE11
ENSG00000026950	BTN3A1		ENSG00000021574	SPAST
ENSG00000027075	PRKCH		ENSG00000021645	NRXN3
ENSG00000027697	IFNGR1		ENSG00000021776	AQR
ENSG00000027847	B4GALT7		ENSG00000022267	FHL1
ENSG00000028203	VEZT		ENSG00000022355	GABRA1
ENSG00000028277	POU2F2		ENSG00000022556	NLRP2
ENSG00000028528	SNX1		ENSG00000022976	ZNF839
ENSG00000029363	BCLAF1		ENSG00000023041	ZDHHC6
ENSG00000029364	SLC39A9		ENSG00000023171	GRAMD1B
ENSG00000029639	TFB1M		ENSG00000023228	NDUFS1
ENSG00000030304	MUSK		ENSG00000023287	RB1CC1
ENSG00000030419	IKZF2		ENSG00000023318	ERP44
ENSG00000032219	ARID4A		ENSG00000023445	BIRC3
ENSG00000033122	LRRC7		ENSG00000023516	AKAP11
ENSG00000033178	UBA6		ENSG00000023572	GLRX2
ENSG00000033327	GAB2		ENSG00000023697	DERA
ENSG00000033800	PIAS1		ENSG00000023734	STRAP
ENSG00000033867	SLC4A7		ENSG00000024422	EHD2
ENSG00000034239	EFCAB1		ENSG00000024862	CCDC28A
ENSG00000035499	DEPDC1B		ENSG00000025039	RRAGD
ENSG00000035664	DAPK2		ENSG00000025293	PHF20
ENSG00000035862	TIMP2		ENSG00000025796	SEC63
ENSG00000035928	RFC1		ENSG00000026508	CD44
ENSG00000036257	CUL3		ENSG00000026652	AGPAT4
ENSG00000036565	SLC18A1		ENSG00000027847	B4GALT7
ENSG00000037280	FLT4		ENSG00000028116	VRK2
ENSG00000037757	MRI1		ENSG00000028203	VEZT
ENSG00000038532	CLEC16A		ENSG00000028310	BRD9
ENSG00000039560	RAI14		ENSG00000028528	SNX1
ENSG00000039600	SOX30		ENSG00000028839	TBPL1
ENSG00000040199	PHLPP2		ENSG00000029363	BCLAF1
ENSG00000040633	PHF23		ENSG00000029534	ANK1
ENSG00000040731	CDH10		ENSG00000029639	TFB1M
ENSG00000040933	INPP4A		ENSG00000029993	HMGB3
ENSG00000041353	RAB27B		ENSG00000030066	NUP160
ENSG00000041357	PSMA4		ENSG00000030304	MUSK
ENSG00000041515	MYO16		ENSG00000030419	IKZF2
ENSG00000041982	TNC		ENSG00000030582	GRN
ENSG00000042088	TDP1		ENSG00000031003	FAM13B
ENSG00000042286	AIFM2		ENSG00000032219	ARID4A
ENSG00000042429	MED17		ENSG00000032742	IFT88
ENSG00000042832	TG		ENSG00000033050	ABCF2
ENSG00000042980	ADAM28		ENSG00000033122	LRRC7
ENSG00000043514	TRIT1		ENSG00000033178	UBA6
ENSG00000043591	ADRB1		ENSG00000033627	ATP6V0A1
ENSG00000044459	CNTLN		ENSG00000033800	PIAS1
ENSG00000046604	DSG2		ENSG00000033867	SLC4A7
ENSG00000046651	OFD1		ENSG00000034239	EFCAB1
ENSG00000046653	GPM6B		ENSG00000034533	ASTE1
ENSG00000046889	PREX2		ENSG00000034677	RNF19A
ENSG00000047056	WDR37		ENSG00000035664	DAPK2
ENSG00000047365	ARAP2		ENSG00000035681	NSMAF
ENSG00000047410	TPR		ENSG00000035687	ADSS2
ENSG00000047579	DTNBP1		ENSG00000035928	RFC1
ENSG00000047621	C12orf4		ENSG00000036257	CUL3
ENSG00000047644	WWC3		ENSG00000036473	OTC
ENSG00000047662	FAM184B		ENSG00000036530	CYP46A1
ENSG00000048028	USP28		ENSG00000036672	USP2
ENSG00000048052	HDAC9		ENSG00000036828	CASR
ENSG00000048342	CC2D2A		ENSG00000037280	FLT4
ENSG00000048392	RRM2B		ENSG00000037637	FBXO42
ENSG00000048405	ZNF800		ENSG00000037757	MRI1
ENSG00000048471	SNX29		ENSG00000037965	HOXC8
ENSG00000048544	MRPS10		ENSG00000038002	AGA
ENSG00000048649	RSF1		ENSG00000038295	TLL1
ENSG00000048740	CELF2		ENSG00000038382	TRIO
ENSG00000048828	FAM120A		ENSG00000038427	VCAN
ENSG00000049130	KITLG		ENSG00000038945	MSR1
ENSG00000049167	ERCC8		ENSG00000039319	ZFYVE16
ENSG00000049192	ADAMTS6		ENSG00000039560	RAI14
ENSG00000049239	H6PD		ENSG00000040199	PHLPP2
ENSG00000049249	TNFRSF9		ENSG00000040341	STAU2
ENSG00000049449	RCN1		ENSG00000040531	CTNS
ENSG00000049618	ARID1B		ENSG00000040731	CDH10
ENSG00000049759	NEDD4L		ENSG00000041353	RAB27B
ENSG00000049883	PTCD2		ENSG00000041357	PSMA4
ENSG00000050030	NEXMIF		ENSG00000042088	TDP1
ENSG00000050130	JKAMP		ENSG00000042286	AIFM2
ENSG00000050165	DKK3		ENSG00000042429	MED17
ENSG00000050344	NFE2L3		ENSG00000042781	USH2A
ENSG00000050393	MCUR1		ENSG00000042980	ADAM28
ENSG00000050438	SLC4A8		ENSG00000043039	BARX2
ENSG00000050555	LAMC3		ENSG00000043093	DCUN1D1
ENSG00000050628	PTGER3		ENSG00000043143	JADE2
ENSG00000050748	MAPK9		ENSG00000043462	LCP2
ENSG00000051523	CYBA		ENSG00000043514	TRIT1
ENSG00000051620	HEBP2		ENSG00000044524	EPHA3
ENSG00000051825	MPHOSPH9		ENSG00000044574	HSPA5
ENSG00000052126	PLEKHA5		ENSG00000046604	DSG2
ENSG00000052723	SIKE1		ENSG00000046647	GEMIN8
ENSG00000052795	FNIP2		ENSG00000046889	PREX2
ENSG00000052802	MSMO1		ENSG00000047188	YTHDC2
ENSG00000053254	FOXN3		ENSG00000047249	ATP6V1H
ENSG00000053524	MCF2L2		ENSG00000047346	FAM214A
ENSG00000053770	AP5M1		ENSG00000047579	DTNBP1
ENSG00000053918	KCNQ1		ENSG00000047621	C12orf4
ENSG00000054267	ARID4B		ENSG00000047648	ARHGAP6
ENSG00000054523	KIF1B		ENSG00000047662	FAM184B
ENSG00000054654	SYNE2		ENSG00000047849	MAP4
ENSG00000054793	ATP9A		ENSG00000048052	HDAC9
ENSG00000054796	SPO11		ENSG00000048342	CC2D2A
ENSG00000054983	GALC		ENSG00000048392	RRM2B
ENSG00000055070	SZRD1		ENSG00000048471	SNX29
ENSG00000055130	CUL1		ENSG00000048544	MRPS10
ENSG00000055147	FAM114A2		ENSG00000048649	RSF1
ENSG00000055163	CYFIP2		ENSG00000048740	CELF2
ENSG00000055609	KMT2C		ENSG00000048828	FAM120A
ENSG00000055732	MCOLN3		ENSG00000049130	KITLG
ENSG00000056586	RC3H2		ENSG00000049167	ERCC8
ENSG00000056972	TRAF3IP2		ENSG00000049192	ADAMTS6
ENSG00000056998	GYG2		ENSG00000049249	TNFRSF9
ENSG00000057019	DCBLD2		ENSG00000049323	LTBP1
ENSG00000057252	SOAT1		ENSG00000049449	RCN1
ENSG00000057294	PKP2		ENSG00000049618	ARID1B
ENSG00000057657	PRDM1		ENSG00000049769	PPP1R3F
ENSG00000057704	TMCC3		ENSG00000049883	PTCD2
ENSG00000057757	PITHD1		ENSG00000050030	NEXMIF
ENSG00000058056	USP13		ENSG00000050130	JKAMP
ENSG00000058063	ATP11B		ENSG00000050165	DKK3
ENSG00000058085	LAMC2		ENSG00000050344	NFE2L3
ENSG00000058091	CDK14		ENSG00000050405	LIMA1
ENSG00000058262	SEC61A1		ENSG00000050438	SLC4A8
ENSG00000058272	PPP1R12A		ENSG00000050628	PTGER3
ENSG00000058673	ZC3H11A		ENSG00000050730	TNIP3
ENSG00000058804	NDC1		ENSG00000050748	MAPK9
ENSG00000059145	UNKL		ENSG00000051382	PIK3CB
ENSG00000059573	ALDH18A1		ENSG00000051620	HEBP2
ENSG00000059728	MXD1		ENSG00000052126	PLEKHA5
ENSG00000060237	WNK1		ENSG00000052723	SIKE1
ENSG00000060339	CCAR1		ENSG00000052795	FNIP2
ENSG00000060642	PIGV		ENSG00000052802	MSMO1
ENSG00000060688	SNRNP40		ENSG00000052850	ALX4
ENSG00000060709	RIMBP2		ENSG00000053108	FSTL4
ENSG00000060718	COL11A1		ENSG00000053254	FOXN3
ENSG00000060971	ACAA1		ENSG00000053501	USE1
ENSG00000060982	BCAT1		ENSG00000053524	MCF2L2
ENSG00000061455	PRDM6		ENSG00000053770	AP5M1
ENSG00000061492	WNT8A		ENSG00000054118	THRAP3
ENSG00000061676	NCKAP1		ENSG00000054219	LY75
ENSG00000061918	GUCY1B1		ENSG00000054392	HHAT
ENSG00000061987	MON2		ENSG00000054523	KIF1B
ENSG00000062485	CS		ENSG00000054654	SYNE2
ENSG00000062725	APPBP2		ENSG00000054690	PLEKHH1
ENSG00000063046	EIF4B		ENSG00000054793	ATP9A
ENSG00000063127	SLC6A16		ENSG00000054967	RELT
ENSG00000063322	MED29		ENSG00000054983	GALC
ENSG00000063601	MTMR1		ENSG00000055130	CUL1
ENSG00000064115	TM7SF3		ENSG00000055208	TAB2
ENSG00000064225	ST3GAL6		ENSG00000055211	GINM1
ENSG00000064309	CDON		ENSG00000055332	EIF2AK2
ENSG00000064393	HIPK2		ENSG00000055483	AC022966.1
ENSG00000064545	TMEM161A		ENSG00000055732	MCOLN3
ENSG00000064652	SNX24		ENSG00000055813	CCDC85A
ENSG00000064726	BTBD1		ENSG00000055917	PUM2
ENSG00000064933	PMS1		ENSG00000056586	RC3H2
ENSG00000064999	ANKS1A		ENSG00000056972	TRAF3IP2
ENSG00000065000	AP3D1		ENSG00000057019	DCBLD2
ENSG00000065060	UHRF1BP1		ENSG00000057252	SOAT1
ENSG00000065135	GNAI3		ENSG00000057294	PKP2
ENSG00000065183	WDR3		ENSG00000057663	ATG5
ENSG00000065308	TRAM2		ENSG00000057704	TMCC3
ENSG00000065413	ANKRD44		ENSG00000057935	MTA3
ENSG00000065559	MAP2K4		ENSG00000058056	USP13
ENSG00000065613	SLK		ENSG00000058063	ATP11B
ENSG00000065618	COL17A1		ENSG00000058600	POLR3E
ENSG00000065621	GSTO2		ENSG00000058668	ATP2B4
ENSG00000065802	ASB1		ENSG00000058673	ZC3H11A
ENSG00000065883	CDK13		ENSG00000058804	NDC1
ENSG00000065911	MTHFD2		ENSG00000059378	PARP12
ENSG00000065923	SLC9A7		ENSG00000059728	MXD1
ENSG00000066032	CTNNA2		ENSG00000059769	DNAJC25
ENSG00000066044	ELAVL1		ENSG00000060069	CTDP1
ENSG00000066084	DIP2B		ENSG00000060138	YBX3
ENSG00000066135	KDM4A		ENSG00000060237	WNK1
ENSG00000066185	ZMYND12		ENSG00000060339	CCAR1
ENSG00000066336	SPI1		ENSG00000060709	RIMBP2
ENSG00000066468	FGFR2		ENSG00000060718	COL11A1
ENSG00000066557	LRRC40		ENSG00000061455	PRDM6
ENSG00000066651	TRMT11		ENSG00000061676	NCKAP1
ENSG00000066654	THUMPD1		ENSG00000061936	SFSWAP
ENSG00000066777	ARFGEF1		ENSG00000061987	MON2
ENSG00000066813	ACSM2B		ENSG00000062485	CS
ENSG00000066926	FECH		ENSG00000062598	ELMO2
ENSG00000066933	MYO9A		ENSG00000062650	WAPL
ENSG00000067066	SP100		ENSG00000062725	APPBP2
ENSG00000067082	KLF6		ENSG00000063046	EIF4B
ENSG00000067177	PHKA1		ENSG00000063322	MED29
ENSG00000067221	STOML1		ENSG00000063587	ZNF275
ENSG00000067334	DNTTIP2		ENSG00000063978	RNF4
ENSG00000067369	TP53BP1		ENSG00000064012	CASP8
ENSG00000067533	RRP15		ENSG00000064042	LIMCH1
ENSG00000067646	ZFY		ENSG00000064115	TM7SF3
ENSG00000067715	SYT1		ENSG00000064199	SPA17
ENSG00000067798	NAV3		ENSG00000064218	DMRT3
ENSG00000067955	CBFB		ENSG00000064309	CDON
ENSG00000067992	PDK3		ENSG00000064393	HIPK2
ENSG00000068097	HEATR6		ENSG00000064545	TMEM161A
ENSG00000068305	MEF2A		ENSG00000064607	SUGP2
ENSG00000068438	FTSJ1		ENSG00000064651	SLC12A2
ENSG00000068615	REEP1		ENSG00000064652	SNX24
ENSG00000068650	ATP11A		ENSG00000064655	EYA2
ENSG00000068697	LAPTM4A		ENSG00000064666	CNN2
ENSG00000068724	TTC7A		ENSG00000064726	BTBD1
ENSG00000068878	PSME4		ENSG00000064763	FAR2
ENSG00000068885	IFT80		ENSG00000064989	CALCRL
ENSG00000068903	SIRT2		ENSG00000064999	ANKS1A
ENSG00000069122	ADGRF5		ENSG00000065029	ZNF76
ENSG00000069206	ADAM7		ENSG00000065060	UHRF1BP1
ENSG00000069248	NUP133		ENSG00000065135	GNAI3
ENSG00000069275	NUCKS1		ENSG00000065150	IPO5
ENSG00000069329	VPS35		ENSG00000065183	WDR3
ENSG00000069345	DNAJA2		ENSG00000065328	MCM10
ENSG00000069493	CLEC2D		ENSG00000065371	ROPN1
ENSG00000069667	RORA		ENSG00000065413	ANKRD44
ENSG00000069702	TGFBR3		ENSG00000065427	KARS1
ENSG00000069869	NEDD4		ENSG00000065457	ADAT1
ENSG00000069956	MAPK6		ENSG00000065485	PDIA5
ENSG00000069966	GNB5		ENSG00000065534	MYLK
ENSG00000069998	HDHD5		ENSG00000065548	ZC3H15
ENSG00000070018	LRP6		ENSG00000065559	MAP2K4
ENSG00000070081	NUCB2		ENSG00000065609	SNAP91
ENSG00000070214	SLC44A1		ENSG00000065613	SLK
ENSG00000070367	EXOC5		ENSG00000065615	CYB5R4
ENSG00000070371	CLTCL1		ENSG00000065618	COL17A1
ENSG00000070718	AP3M2		ENSG00000065621	GSTO2
ENSG00000070729	CNGB1		ENSG00000065665	SEC61A2
ENSG00000070748	CHAT		ENSG00000065675	PRKCQ
ENSG00000070756	PABPC1		ENSG00000065833	ME1
ENSG00000070761	CFAP20		ENSG00000065882	TBC1D1
ENSG00000070831	CDC42		ENSG00000065883	CDK13
ENSG00000070882	OSBPL3		ENSG00000065923	SLC9A7
ENSG00000070950	RAD18		ENSG00000066032	CTNNA2
ENSG00000071082	RPL31		ENSG00000066044	ELAVL1
ENSG00000071243	ING3		ENSG00000066084	DIP2B
ENSG00000071537	SEL1L		ENSG00000066185	ZMYND12
ENSG00000071539	TRIP13		ENSG00000066294	CD84
ENSG00000071575	TRIB2		ENSG00000066382	MPPED2
ENSG00000071909	MYO3B		ENSG00000066405	CLDN18
ENSG00000071967	CYBRD1		ENSG00000066422	ZBTB11
ENSG00000071991	CDH19		ENSG00000066427	ATXN3
ENSG00000072041	SLC6A15		ENSG00000066629	EML1
ENSG00000072042	RDH11		ENSG00000066651	TRMT11
ENSG00000072071	ADGRL1		ENSG00000066654	THUMPD1
ENSG00000072121	ZFYVE26		ENSG00000066697	MSANTD3
ENSG00000072133	RPS6KA6		ENSG00000066777	ARFGEF1
ENSG00000072210	ALDH3A2		ENSG00000066813	ACSM2B
ENSG00000072274	TFRC		ENSG00000066855	MTFR1
ENSG00000072401	UBE2D1		ENSG00000066923	STAG3
ENSG00000072501	SMC1A		ENSG00000066926	FECH
ENSG00000072609	CHFR		ENSG00000066933	MYO9A
ENSG00000072657	TRHDE		ENSG00000067048	DDX3Y
ENSG00000072736	NFATC3		ENSG00000067064	IDI1
ENSG00000072756	TRNT1		ENSG00000067066	SP100
ENSG00000072803	FBXW11		ENSG00000067082	KLF6
ENSG00000072840	EVC		ENSG00000067177	PHKA1
ENSG00000072849	DERL2		ENSG00000067208	EVI5
ENSG00000072858	SIDT1		ENSG00000067334	DNTTIP2
ENSG00000072958	AP1M1		ENSG00000067365	METTL22
ENSG00000073008	PVR		ENSG00000067533	RRP15
ENSG00000073282	TP63		ENSG00000067560	RHOA
ENSG00000073464	CLCN4		ENSG00000067715	SYT1
ENSG00000073584	SMARCE1		ENSG00000067798	NAV3
ENSG00000073614	KDM5A		ENSG00000067955	CBFB
ENSG00000073754	CD5L		ENSG00000067992	PDK3
ENSG00000073756	PTGS2		ENSG00000068097	HEATR6
ENSG00000073803	MAP3K13		ENSG00000068305	MEF2A
ENSG00000073910	FRY		ENSG00000068323	TFE3
ENSG00000074181	NOTCH3		ENSG00000068366	ACSL4
ENSG00000074201	CLNS1A		ENSG00000068615	REEP1
ENSG00000074211	PPP2R2C		ENSG00000068878	PSME4
ENSG00000074319	TSG101		ENSG00000068885	IFT80
ENSG00000074356	NCBP3		ENSG00000069020	MAST4
ENSG00000074590	NUAK1		ENSG00000069122	ADGRF5
ENSG00000074603	DPP8		ENSG00000069188	SDK2
ENSG00000074657	ZNF532		ENSG00000069206	ADAM7
ENSG00000074695	LMAN1		ENSG00000069275	NUCKS1
ENSG00000074706	IPCEF1		ENSG00000069329	VPS35
ENSG00000075035	WSCD2		ENSG00000069345	DNAJA2
ENSG00000075043	KCNQ2		ENSG00000069431	ABCC9
ENSG00000075089	ACTR6		ENSG00000069493	CLEC2D
ENSG00000075131	TIPIN		ENSG00000069509	FUNDC1
ENSG00000075142	SRI		ENSG00000069535	MAOB
ENSG00000075213	SEMA3A		ENSG00000069667	RORA
ENSG00000075223	SEMA3C		ENSG00000069702	TGFBR3
ENSG00000075239	ACAT1		ENSG00000069869	NEDD4
ENSG00000075336	TIMM21		ENSG00000069956	MAPK6
ENSG00000075340	ADD2		ENSG00000069966	GNB5
ENSG00000075391	RASAL2		ENSG00000069974	RAB27A
ENSG00000075407	ZNF37A		ENSG00000070018	LRP6
ENSG00000075415	SLC25A3		ENSG00000070047	PHRF1
ENSG00000075420	FNDC3B		ENSG00000070061	ELP1
ENSG00000075426	FOSL2		ENSG00000070081	NUCB2
ENSG00000075539	FRYL		ENSG00000070087	PFN2
ENSG00000075651	PLD1		ENSG00000070182	SPTB
ENSG00000075711	DLG1		ENSG00000070190	DAPP1
ENSG00000075790	BCAP29		ENSG00000070193	FGF10
ENSG00000075856	SART3		ENSG00000070269	TMEM260
ENSG00000075884	ARHGAP15		ENSG00000070367	EXOC5
ENSG00000075975	MKRN2		ENSG00000070371	CLTCL1
ENSG00000076053	RBM7		ENSG00000070423	RNF126
ENSG00000076067	RBMS2		ENSG00000070540	WIPI1
ENSG00000076321	KLHL20		ENSG00000070669	ASNS
ENSG00000076344	RGS11		ENSG00000070718	AP3M2
ENSG00000076351	SLC46A1		ENSG00000070729	CNGB1
ENSG00000076513	ANKRD13A		ENSG00000070770	CSNK2A2
ENSG00000076555	ACACB		ENSG00000070814	TCOF1
ENSG00000076770	MBNL3		ENSG00000070831	CDC42
ENSG00000076864	RAP1GAP		ENSG00000070882	OSBPL3
ENSG00000076928	ARHGEF1		ENSG00000070915	SLC12A3
ENSG00000077063	CTTNBP2		ENSG00000071054	MAP4K4
ENSG00000077147	TM9SF3		ENSG00000071073	MGAT4A
ENSG00000077157	PPP1R12B		ENSG00000071082	RPL31
ENSG00000077232	DNAJC10		ENSG00000071189	SNX13
ENSG00000077254	USP33		ENSG00000071242	RPS6KA2
ENSG00000077264	PAK3		ENSG00000071243	ING3
ENSG00000077522	ACTN2		ENSG00000071282	LMCD1
ENSG00000077616	NAALAD2		ENSG00000071539	TRIP13
ENSG00000077684	JADE1		ENSG00000071575	TRIB2
ENSG00000077713	SLC25A43		ENSG00000071967	CYBRD1
ENSG00000077782	FGFR1		ENSG00000071991	CDH19
ENSG00000077800	FKBP6		ENSG00000071994	PDCD2
ENSG00000078043	PIAS2		ENSG00000072041	SLC6A15
ENSG00000078070	MCCC1		ENSG00000072042	RDH11
ENSG00000078081	LAMP3		ENSG00000072062	PRKACA
ENSG00000078098	FAP		ENSG00000072071	ADGRL1
ENSG00000078114	NEBL		ENSG00000072133	RPS6KA6
ENSG00000078124	ACER3		ENSG00000072195	SPEG
ENSG00000078142	PIK3C3		ENSG00000072210	ALDH3A2
ENSG00000078177	N4BP2		ENSG00000072315	TRPC5
ENSG00000078237	TIGAR		ENSG00000072364	AFF4
ENSG00000078295	ADCY2		ENSG00000072415	MPP5
ENSG00000078304	PPP2R5C		ENSG00000072501	SMC1A
ENSG00000078328	RBFOX1		ENSG00000072609	CHFR
ENSG00000078399	HOXA9		ENSG00000072657	TRHDE
ENSG00000078579	FGF20		ENSG00000072736	NFATC3
ENSG00000078589	P2RY10		ENSG00000072803	FBXW11
ENSG00000078674	PCM1		ENSG00000072832	CRMP1
ENSG00000078687	TNRC6C		ENSG00000072849	DERL2
ENSG00000078699	CBFA2T2		ENSG00000072952	MRVI1
ENSG00000078804	TP53INP2		ENSG00000073008	PVR
ENSG00000078902	TOLLIP		ENSG00000073111	MCM2
ENSG00000079101	CLUL1		ENSG00000073146	MOV10L1
ENSG00000079102	RUNX1T1		ENSG00000073282	TP63
ENSG00000079112	CDH17		ENSG00000073331	ALPK1
ENSG00000079150	FKBP7		ENSG00000073350	LLGL2
ENSG00000079156	OSBPL6		ENSG00000073417	PDE8A
ENSG00000079277	MKNK1		ENSG00000073578	SDHA
ENSG00000079332	SAR1A		ENSG00000073584	SMARCE1
ENSG00000079335	CDC14A		ENSG00000073670	ADAM11
ENSG00000079337	RAPGEF3		ENSG00000073712	FERMT2
ENSG00000079387	SENP1		ENSG00000073792	IGF2BP2
ENSG00000079459	FDFT1		ENSG00000073803	MAP3K13
ENSG00000079482	OPHN1		ENSG00000073849	ST6GAL1
ENSG00000079691	CARMIL1		ENSG00000073861	TBX21
ENSG00000079819	EPB41L2		ENSG00000073910	FRY
ENSG00000079950	STX7		ENSG00000073921	PICALM
ENSG00000080166	DCT		ENSG00000074047	GLI2
ENSG00000080345	RIF1		ENSG00000074211	PPP2R2C
ENSG00000080371	RAB21		ENSG00000074356	NCBP3
ENSG00000080493	SLC4A4		ENSG00000074527	NTN4
ENSG00000080503	SMARCA2		ENSG00000074603	DPP8
ENSG00000080603	SRCAP		ENSG00000074621	SLC24A1
ENSG00000080802	CNOT4		ENSG00000074657	ZNF532
ENSG00000080815	PSEN1		ENSG00000074696	HACD3
ENSG00000080824	HSP90AA1		ENSG00000074706	IPCEF1
ENSG00000080854	IGSF9B		ENSG00000074803	SLC12A1
ENSG00000081014	AP4E1		ENSG00000074935	TUBE1
ENSG00000081041	CXCL2		ENSG00000074966	TXK
ENSG00000081087	OSTM1		ENSG00000075043	KCNQ2
ENSG00000081148	IMPG2		ENSG00000075073	TACR2
ENSG00000081177	EXD2		ENSG00000075131	TIPIN
ENSG00000081189	MEF2C		ENSG00000075151	EIF4G3
ENSG00000081237	PTPRC		ENSG00000075213	SEMA3A
ENSG00000081307	UBA5		ENSG00000075223	SEMA3C
ENSG00000081479	LRP2		ENSG00000075234	TTC38
ENSG00000081665	ZNF506		ENSG00000075239	ACAT1
ENSG00000081760	AACS		ENSG00000075336	TIMM21
ENSG00000081800	SLC13A1		ENSG00000075340	ADD2
ENSG00000081803	CADPS2		ENSG00000075391	RASAL2
ENSG00000081842	PCDHA6		ENSG00000075426	FOSL2
ENSG00000081870	HSPB11		ENSG00000075429	CACNG5
ENSG00000082014	SMARCD3		ENSG00000075539	FRYL
ENSG00000082074	FYB1		ENSG00000075568	TMEM131
ENSG00000082153	BZW1		ENSG00000075618	FSCN1
ENSG00000082175	PGR		ENSG00000075624	ACTB
ENSG00000082212	ME2		ENSG00000075643	MOCOS
ENSG00000082213	C5orf22		ENSG00000075651	PLD1
ENSG00000082258	CCNT2		ENSG00000075711	DLG1
ENSG00000082293	COL19A1		ENSG00000075785	RAB7A
ENSG00000082397	EPB41L3		ENSG00000075790	BCAP29
ENSG00000082438	COBLL1		ENSG00000075856	SART3
ENSG00000082512	TRAF5		ENSG00000075884	ARHGAP15
ENSG00000082515	MRPL22		ENSG00000076053	RBM7
ENSG00000082701	GSK3B		ENSG00000076067	RBMS2
ENSG00000082898	XPO1		ENSG00000076321	KLHL20
ENSG00000083067	TRPM3		ENSG00000076344	RGS11
ENSG00000083168	KAT6A		ENSG00000076351	SLC46A1
ENSG00000083223	TUT7		ENSG00000076356	PLXNA2
ENSG00000083312	TNPO1		ENSG00000076554	TPD52
ENSG00000083520	DIS3		ENSG00000076555	ACACB
ENSG00000083642	PDS5B		ENSG00000076641	PAG1
ENSG00000083720	OXCT1		ENSG00000076716	GPC4
ENSG00000083828	ZNF586		ENSG00000076770	MBNL3
ENSG00000083844	ZNF264		ENSG00000077044	DGKD
ENSG00000083937	CHMP2B		ENSG00000077147	TM9SF3
ENSG00000084073	ZMPSTE24		ENSG00000077157	PPP1R12B
ENSG00000084110	HAL		ENSG00000077232	DNAJC10
ENSG00000084112	SSH1		ENSG00000077238	IL4R
ENSG00000084234	APLP2		ENSG00000077264	PAK3
ENSG00000084453	SLCO1A2		ENSG00000077279	DCX
ENSG00000084463	WBP11		ENSG00000077327	SPAG6
ENSG00000084652	TXLNA		ENSG00000077458	FAM76B
ENSG00000084676	NCOA1		ENSG00000077514	POLD3
ENSG00000084693	AGBL5		ENSG00000077522	ACTN2
ENSG00000084710	EFR3B		ENSG00000077616	NAALAD2
ENSG00000084731	KIF3C		ENSG00000077684	JADE1
ENSG00000084733	RAB10		ENSG00000077721	UBE2A
ENSG00000084754	HADHA		ENSG00000077800	FKBP6
ENSG00000085224	ATRX		ENSG00000077942	FBLN1
ENSG00000085231	AK6		ENSG00000078018	MAP2
ENSG00000085265	FCN1		ENSG00000078043	PIAS2
ENSG00000085274	MYNN		ENSG00000078070	MCCC1
ENSG00000085365	SCAMP1		ENSG00000078124	ACER3
ENSG00000085377	PREP		ENSG00000078140	UBE2K
ENSG00000085382	HACE1		ENSG00000078142	PIK3C3
ENSG00000085415	SEH1L		ENSG00000078237	TIGAR
ENSG00000085449	WDFY1		ENSG00000078246	TULP3
ENSG00000085491	SLC25A24		ENSG00000078304	PPP2R5C
ENSG00000085511	MAP3K4		ENSG00000078401	EDN1
ENSG00000085871	MGST2		ENSG00000078549	ADCYAP1R1
ENSG00000086232	EIF2AK1		ENSG00000078589	P2RY10
ENSG00000086696	HSD17B2		ENSG00000078618	NRDC
ENSG00000086848	ALG9		ENSG00000078668	VDAC3
ENSG00000087263	OGFOD1		ENSG00000078674	PCM1
ENSG00000087266	SH3BP2		ENSG00000078699	CBFA2T2
ENSG00000087299	L2HGDH		ENSG00000078747	ITCH
ENSG00000087302	RTRAF		ENSG00000078804	TP53INP2
ENSG00000087460	GNAS		ENSG00000078967	UBE2D4
ENSG00000087470	DNM1L		ENSG00000079102	RUNX1T1
ENSG00000087502	ERGIC2		ENSG00000079156	OSBPL6
ENSG00000087589	CASS4		ENSG00000079215	SLC1A3
ENSG00000087903	RFX2		ENSG00000079257	LXN
ENSG00000087995	METTL2A		ENSG00000079277	MKNK1
ENSG00000088053	GP6		ENSG00000079308	TNS1
ENSG00000088179	PTPN4		ENSG00000079335	CDC14A
ENSG00000088356	PDRG1		ENSG00000079337	RAPGEF3
ENSG00000088386	SLC15A1		ENSG00000079385	CEACAM1
ENSG00000088387	DOCK9		ENSG00000079459	FDFT1
ENSG00000088854	C20orf194		ENSG00000079482	OPHN1
ENSG00000088888	MAVS		ENSG00000079931	MOXD1
ENSG00000088986	DYNLL1		ENSG00000079950	STX7
ENSG00000089022	MAPKAPK5		ENSG00000079999	KEAP1
ENSG00000089041	P2RX7		ENSG00000080189	SLC35C2
ENSG00000089053	ANAPC5		ENSG00000080298	RFX3
ENSG00000089063	TMEM230		ENSG00000080345	RIF1
ENSG00000089091	DZANK1		ENSG00000080371	RAB21
ENSG00000089157	RPLP0		ENSG00000080493	SLC4A4
ENSG00000089177	KIF16B		ENSG00000080503	SMARCA2
ENSG00000089248	ERP29		ENSG00000080802	CNOT4
ENSG00000089280	FUS		ENSG00000080815	PSEN1
ENSG00000089723	OTUB2		ENSG00000080824	HSP90AA1
ENSG00000089737	DDX24		ENSG00000080839	RBL1
ENSG00000089775	ZBTB25		ENSG00000080845	DLGAP4
ENSG00000089818	NECAP1		ENSG00000080854	IGSF9B
ENSG00000089902	RCOR1		ENSG00000081019	RSBN1
ENSG00000089916	GPATCH2L		ENSG00000081026	MAGI3
ENSG00000090054	SPTLC1		ENSG00000081052	COL4A4
ENSG00000090060	PAPOLA		ENSG00000081087	OSTM1
ENSG00000090266	NDUFB2		ENSG00000081138	CDH7
ENSG00000090376	IRAK3		ENSG00000081189	MEF2C
ENSG00000090554	FLT3LG		ENSG00000081237	PTPRC
ENSG00000090612	ZNF268		ENSG00000081320	STK17B
ENSG00000090615	GOLGA3		ENSG00000081665	ZNF506
ENSG00000090674	MCOLN1		ENSG00000081760	AACS
ENSG00000090857	PDPR		ENSG00000081800	SLC13A1
ENSG00000090863	GLG1		ENSG00000081803	CADPS2
ENSG00000090924	PLEKHG2		ENSG00000081842	PCDHA6
ENSG00000091039	OSBPL8		ENSG00000081853	PCDHGA2
ENSG00000091128	LAMB4		ENSG00000081923	ATP8B1
ENSG00000091129	NRCAM		ENSG00000082074	FYB1
ENSG00000091157	WDR7		ENSG00000082126	MPP4
ENSG00000091164	TXNL1		ENSG00000082153	BZW1
ENSG00000091262	ABCC6		ENSG00000082175	PGR
ENSG00000091317	CMTM6		ENSG00000082212	ME2
ENSG00000091409	ITGA6		ENSG00000082258	CCNT2
ENSG00000091428	RAPGEF4		ENSG00000082293	COL19A1
ENSG00000091436	MAP3K20		ENSG00000082397	EPB41L3
ENSG00000091513	TF		ENSG00000082438	COBLL1
ENSG00000091527	CDV3		ENSG00000082482	KCNK2
ENSG00000091592	NLRP1		ENSG00000082515	MRPL22
ENSG00000091622	PITPNM3		ENSG00000082701	GSK3B
ENSG00000091656	ZFHX4		ENSG00000082805	ERC1
ENSG00000091831	ESR1		ENSG00000082898	XPO1
ENSG00000091844	RGS17		ENSG00000083067	TRPM3
ENSG00000091986	CCDC80		ENSG00000083123	BCKDHB
ENSG00000092140	G2E3		ENSG00000083168	KAT6A
ENSG00000092208	GEMIN2		ENSG00000083290	ULK2
ENSG00000092421	SEMA6A		ENSG00000083312	TNPO1
ENSG00000092439	TRPM7		ENSG00000083520	DIS3
ENSG00000092445	TYRO3		ENSG00000083544	TDRD3
ENSG00000092470	WDR76		ENSG00000083635	NUFIP1
ENSG00000092531	SNAP23		ENSG00000083642	PDS5B
ENSG00000092847	AGO1		ENSG00000083799	CYLD
ENSG00000092853	CLSPN		ENSG00000083812	ZNF324
ENSG00000092969	TGFB2		ENSG00000083814	ZNF671
ENSG00000093072	ADA2		ENSG00000083817	ZNF416
ENSG00000093167	LRRFIP2		ENSG00000083828	ZNF586
ENSG00000093183	SEC22C		ENSG00000083844	ZNF264
ENSG00000093217	XYLB		ENSG00000084072	PPIE
ENSG00000094631	HDAC6		ENSG00000084073	ZMPSTE24
ENSG00000094755	GABRP		ENSG00000084110	HAL
ENSG00000094841	UPRT		ENSG00000084112	SSH1
ENSG00000094916	CBX5		ENSG00000084234	APLP2
ENSG00000094963	FMO2		ENSG00000084444	FAM234B
ENSG00000095002	MSH2		ENSG00000084453	SLCO1A2
ENSG00000095015	MAP3K1		ENSG00000084652	TXLNA
ENSG00000095066	HOOK2		ENSG00000084674	APOB
ENSG00000095203	EPB41L4B		ENSG00000084733	RAB10
ENSG00000095209	TMEM38B		ENSG00000085224	ATRX
ENSG00000095303	PTGS1		ENSG00000085265	FCN1
ENSG00000095564	BTAF1		ENSG00000085274	MYNN
ENSG00000095587	TLL2		ENSG00000085377	PREP
ENSG00000095627	TDRD1		ENSG00000085415	SEH1L
ENSG00000095637	SORBS1		ENSG00000085449	WDFY1
ENSG00000095713	CRTAC1		ENSG00000085491	SLC25A24
ENSG00000095787	WAC		ENSG00000085719	CPNE3
ENSG00000095794	CREM		ENSG00000085721	RRN3
ENSG00000095951	HIVEP1		ENSG00000085788	DDHD2
ENSG00000096006	CRISP3		ENSG00000085831	TTC39A
ENSG00000096060	FKBP5		ENSG00000085832	EPS15
ENSG00000096063	SRPK1		ENSG00000085871	MGST2
ENSG00000096070	BRPF3		ENSG00000085978	ATG16L1
ENSG00000096088	PGC		ENSG00000085982	USP40
ENSG00000096717	SIRT1		ENSG00000086061	DNAJA1
ENSG00000096746	HNRNPH3		ENSG00000086062	B4GALT1
ENSG00000097033	SH3GLB1		ENSG00000086102	NFX1
ENSG00000097096	SYDE2		ENSG00000086189	DIMT1
ENSG00000099139	PCSK5		ENSG00000086232	EIF2AK1
ENSG00000099194	SCD		ENSG00000086598	TMED2
ENSG00000099204	ABLIM1		ENSG00000086619	ERO1B
ENSG00000099219	ERMP1		ENSG00000086696	HSD17B2
ENSG00000099290	WASHC2A		ENSG00000086827	ZW10
ENSG00000099338	CATSPERG		ENSG00000086848	ALG9
ENSG00000099715	PCDH11Y		ENSG00000086991	NOX4
ENSG00000099797	TECR		ENSG00000087053	MTMR2
ENSG00000099810	MTAP		ENSG00000087087	SRRT
ENSG00000099875	MKNK2		ENSG00000087095	NLK
ENSG00000099904	ZDHHC8		ENSG00000087111	PIGS
ENSG00000099917	MED15		ENSG00000087157	PGS1
ENSG00000099940	SNAP29		ENSG00000087253	LPCAT2
ENSG00000099942	CRKL		ENSG00000087258	GNAO1
ENSG00000099949	LZTR1		ENSG00000087263	OGFOD1
ENSG00000099995	SF3A1		ENSG00000087266	SH3BP2
ENSG00000100023	PPIL2		ENSG00000087269	NOP14
ENSG00000100024	UPB1		ENSG00000087338	GMCL1
ENSG00000100027	YPEL1		ENSG00000087448	KLHL42
ENSG00000100030	MAPK1		ENSG00000087460	GNAS
ENSG00000100034	PPM1F		ENSG00000087470	DNM1L
ENSG00000100036	SLC35E4		ENSG00000087494	PTHLH
ENSG00000100056	ESS2		ENSG00000087502	ERGIC2
ENSG00000100065	CARD10		ENSG00000088035	ALG6
ENSG00000100077	GRK3		ENSG00000088038	CNOT3
ENSG00000100100	PIK3IP1		ENSG00000088053	GP6
ENSG00000100104	SRRD		ENSG00000088179	PTPN4
ENSG00000100106	TRIOBP		ENSG00000088325	TPX2
ENSG00000100109	TFIP11		ENSG00000088387	DOCK9
ENSG00000100129	EIF3L		ENSG00000088448	ANKRD10
ENSG00000100154	TTC28		ENSG00000088538	DOCK3
ENSG00000100162	CENPM		ENSG00000088726	TMEM40
ENSG00000100167	SEPTIN3		ENSG00000088756	ARHGAP28
ENSG00000100196	KDELR3		ENSG00000088812	ATRN
ENSG00000100216	TOMM22		ENSG00000088832	FKBP1A
ENSG00000100219	XBP1		ENSG00000088833	NSFL1C
ENSG00000100226	GTPBP1		ENSG00000088854	C20orf194
ENSG00000100234	TIMP3		ENSG00000088926	F11
ENSG00000100271	TTLL1		ENSG00000088986	DYNLL1
ENSG00000100280	AP1B1		ENSG00000089022	MAPKAPK5
ENSG00000100311	PDGFB		ENSG00000089041	P2RX7
ENSG00000100320	RBFOX2		ENSG00000089123	TASP1
ENSG00000100321	SYNGR1		ENSG00000089177	KIF16B
ENSG00000100335	MIEF1		ENSG00000089195	TRMT6
ENSG00000100344	PNPLA3		ENSG00000089225	TBX5
ENSG00000100346	CACNA1I		ENSG00000089234	BRAP
ENSG00000100351	GRAP2		ENSG00000089472	HEPH
ENSG00000100354	TNRC6B		ENSG00000089597	GANAB
ENSG00000100368	CSF2RB		ENSG00000089682	RBM41
ENSG00000100372	SLC25A17		ENSG00000089685	BIRC5
ENSG00000100376	FAM118A		ENSG00000089775	ZBTB25
ENSG00000100385	IL2RB		ENSG00000089818	NECAP1
ENSG00000100393	EP300		ENSG00000089916	GPATCH2L
ENSG00000100403	ZC3H7B		ENSG00000090054	SPTLC1
ENSG00000100410	PHF5A		ENSG00000090104	RGS1
ENSG00000100413	POLR3H		ENSG00000090376	IRAK3
ENSG00000100417	PMM1		ENSG00000090487	SPG21
ENSG00000100427	MLC1		ENSG00000090512	FETUB
ENSG00000100433	KCNK10		ENSG00000090612	ZNF268
ENSG00000100441	KHNYN		ENSG00000090857	PDPR
ENSG00000100473	COCH		ENSG00000090905	TNRC6A
ENSG00000100483	VCPKMT		ENSG00000090932	DLL3
ENSG00000100503	NIN		ENSG00000091009	RBM27
ENSG00000100523	DDHD1		ENSG00000091039	OSBPL8
ENSG00000100528	CNIH1		ENSG00000091106	NLRC4
ENSG00000100557	CCDC198		ENSG00000091140	DLD
ENSG00000100558	PLEK2		ENSG00000091157	WDR7
ENSG00000100568	VTI1B		ENSG00000091164	TXNL1
ENSG00000100578	KIAA0586		ENSG00000091181	IL5RA
ENSG00000100591	AHSA1		ENSG00000091317	CMTM6
ENSG00000100592	DAAM1		ENSG00000091513	TF
ENSG00000100596	SPTLC2		ENSG00000091536	MYO15A
ENSG00000100603	SNW1		ENSG00000091542	ALKBH5
ENSG00000100614	PPM1A		ENSG00000091622	PITPNM3
ENSG00000100626	GALNT16		ENSG00000091656	ZFHX4
ENSG00000100629	CEP128		ENSG00000091831	ESR1
ENSG00000100647	SUSD6		ENSG00000091879	ANGPT2
ENSG00000100664	EIF5		ENSG00000091986	CCDC80
ENSG00000100678	SLC8A3		ENSG00000092108	SCFD1
ENSG00000100697	DICER1		ENSG00000092140	G2E3
ENSG00000100714	MTHFD1		ENSG00000092200	RPGRIP1
ENSG00000100722	ZC3H14		ENSG00000092201	SUPT16H
ENSG00000100731	PCNX1		ENSG00000092203	TOX4
ENSG00000100767	PAPLN		ENSG00000092330	TINF2
ENSG00000100784	RPS6KA5		ENSG00000092345	DAZL
ENSG00000100796	PPP4R3A		ENSG00000092421	SEMA6A
ENSG00000100802	C14orf93		ENSG00000092439	TRPM7
ENSG00000100811	YY1		ENSG00000092445	TYRO3
ENSG00000100815	TRIP11		ENSG00000092529	CAPN3
ENSG00000100852	ARHGAP5		ENSG00000092531	SNAP23
ENSG00000100883	SRP54		ENSG00000092621	PHGDH
ENSG00000100902	PSMA6		ENSG00000092820	EZR
ENSG00000100906	NFKBIA		ENSG00000092841	MYL6
ENSG00000100916	BRMS1L		ENSG00000092853	CLSPN
ENSG00000100926	TM9SF1		ENSG00000092871	RFFL
ENSG00000100997	ABHD12		ENSG00000092929	UNC13D
ENSG00000101017	CD40		ENSG00000093000	NUP50
ENSG00000101040	ZMYND8		ENSG00000093144	ECHDC1
ENSG00000101079	NDRG3		ENSG00000093183	SEC22C
ENSG00000101115	SALL4		ENSG00000093217	XYLB
ENSG00000101138	CSTF1		ENSG00000094755	GABRP
ENSG00000101162	TUBB1		ENSG00000094841	UPRT
ENSG00000101166	PRELID3B		ENSG00000094880	CDC23
ENSG00000101191	DIDO1		ENSG00000094916	CBX5
ENSG00000101193	GID8		ENSG00000095139	ARCN1
ENSG00000101198	NKAIN4		ENSG00000095203	EPB41L4B
ENSG00000101204	CHRNA4		ENSG00000095209	TMEM38B
ENSG00000101247	NDUFAF5		ENSG00000095303	PTGS1
ENSG00000101265	RASSF2		ENSG00000095574	IKZF5
ENSG00000101266	CSNK2A1		ENSG00000095585	BLNK
ENSG00000101290	CDS2		ENSG00000095587	TLL2
ENSG00000101294	HM13		ENSG00000095627	TDRD1
ENSG00000101327	PDYN		ENSG00000095951	HIVEP1
ENSG00000101333	PLCB4		ENSG00000095981	KCNK16
ENSG00000101337	TM9SF4		ENSG00000096060	FKBP5
ENSG00000101346	POFUT1		ENSG00000096070	BRPF3
ENSG00000101347	SAMHD1		ENSG00000096092	TMEM14A
ENSG00000101349	PAK5		ENSG00000096093	EFHC1
ENSG00000101413	RPRD1B		ENSG00000096401	CDC5L
ENSG00000101445	PPP1R16B		ENSG00000096746	HNRNPH3
ENSG00000101448	EPPIN		ENSG00000096996	IL12RB1
ENSG00000101464	PIGU		ENSG00000097007	ABL1
ENSG00000101544	ADNP2		ENSG00000097033	SH3GLB1
ENSG00000101558	VAPA		ENSG00000097046	CDC7
ENSG00000101596	SMCHD1		ENSG00000099139	PCSK5
ENSG00000101638	ST8SIA5		ENSG00000099194	SCD
ENSG00000101639	CEP192		ENSG00000099203	TMED1
ENSG00000101746	NOL4		ENSG00000099219	ERMP1
ENSG00000101752	MIB1		ENSG00000099250	NRP1
ENSG00000101812	H2BW2		ENSG00000099365	STX1B
ENSG00000101825	MXRA5		ENSG00000099622	CIRBP
ENSG00000101842	VSIG1		ENSG00000099715	PCDH11Y
ENSG00000101846	STS		ENSG00000099810	MTAP
ENSG00000101856	PGRMC1		ENSG00000099904	ZDHHC8
ENSG00000101868	POLA1		ENSG00000099917	MED15
ENSG00000101871	MID1		ENSG00000099954	CECR2
ENSG00000101882	NKAP		ENSG00000099958	DERL3
ENSG00000101888	NXT2		ENSG00000099968	BCL2L13
ENSG00000101901	ALG13		ENSG00000099995	SF3A1
ENSG00000101916	TLR8		ENSG00000099999	RNF215
ENSG00000101940	WDR13		ENSG00000100003	SEC14L2
ENSG00000101958	GLRA2		ENSG00000100024	UPB1
ENSG00000101966	XIAP		ENSG00000100027	YPEL1
ENSG00000101972	STAG2		ENSG00000100028	SNRPD3
ENSG00000101974	ATP11C		ENSG00000100030	MAPK1
ENSG00000102010	BMX		ENSG00000100077	GRK3
ENSG00000102024	PLS3		ENSG00000100095	SEZ6L
ENSG00000102081	FMR1		ENSG00000100099	HPS4
ENSG00000102100	SLC35A2		ENSG00000100105	PATZ1
ENSG00000102104	RS1		ENSG00000100106	TRIOBP
ENSG00000102119	EMD		ENSG00000100146	SOX10
ENSG00000102174	PHEX		ENSG00000100150	DEPDC5
ENSG00000102178	UBL4A		ENSG00000100154	TTC28
ENSG00000102181	CD99L2		ENSG00000100206	DMC1
ENSG00000102245	CD40LG		ENSG00000100219	XBP1
ENSG00000102317	RBM3		ENSG00000100225	FBXO7
ENSG00000102349	KLF8		ENSG00000100226	GTPBP1
ENSG00000102362	SYTL4		ENSG00000100228	RAB36
ENSG00000102445	RUBCNL		ENSG00000100281	HMGXB4
ENSG00000102452	NALCN		ENSG00000100296	THOC5
ENSG00000102466	FGF14		ENSG00000100302	RASD2
ENSG00000102468	HTR2A		ENSG00000100311	PDGFB
ENSG00000102471	NDFIP2		ENSG00000100320	RBFOX2
ENSG00000102531	FNDC3A		ENSG00000100336	APOL4
ENSG00000102547	CAB39L		ENSG00000100341	PNPLA5
ENSG00000102572	STK24		ENSG00000100345	MYH9
ENSG00000102580	DNAJC3		ENSG00000100350	FOXRED2
ENSG00000102755	FLT1		ENSG00000100354	TNRC6B
ENSG00000102780	DGKH		ENSG00000100364	KIAA0930
ENSG00000102781	KATNAL1		ENSG00000100372	SLC25A17
ENSG00000102786	INTS6		ENSG00000100380	ST13
ENSG00000102796	DHRS12		ENSG00000100393	EP300
ENSG00000102805	CLN5		ENSG00000100395	L3MBTL2
ENSG00000102893	PHKB		ENSG00000100413	POLR3H
ENSG00000102897	LYRM1		ENSG00000100425	BRD1
ENSG00000102908	NFAT5		ENSG00000100426	ZBED4
ENSG00000102910	LONP2		ENSG00000100433	KCNK10
ENSG00000102921	N4BP1		ENSG00000100441	KHNYN
ENSG00000102934	PLLP		ENSG00000100461	RBM23
ENSG00000102935	ZNF423		ENSG00000100478	AP4S1
ENSG00000103018	CYB5B		ENSG00000100503	NIN
ENSG00000103035	PSMD7		ENSG00000100504	PYGL
ENSG00000103037	SETD6		ENSG00000100523	DDHD1
ENSG00000103047	TANGO6		ENSG00000100526	CDKN3
ENSG00000103061	SLC7A6OS		ENSG00000100528	CNIH1
ENSG00000103064	SLC7A6		ENSG00000100554	ATP6V1D
ENSG00000103089	FA2H		ENSG00000100564	PIGH
ENSG00000103091	WDR59		ENSG00000100575	TIMM9
ENSG00000103121	CMC2		ENSG00000100578	KIAA0586
ENSG00000103150	MLYCD		ENSG00000100580	TMED8
ENSG00000103194	USP10		ENSG00000100591	AHSA1
ENSG00000103197	TSC2		ENSG00000100592	DAAM1
ENSG00000103226	NOMO3		ENSG00000100593	ISM2
ENSG00000103227	LMF1		ENSG00000100596	SPTLC2
ENSG00000103241	FOXF1		ENSG00000100599	AL159141.1
ENSG00000103316	CRYM		ENSG00000100603	SNW1
ENSG00000103319	EEF2K		ENSG00000100605	ITPK1
ENSG00000103351	CLUAP1		ENSG00000100614	PPM1A
ENSG00000103363	ELOB		ENSG00000100629	CEP128
ENSG00000103365	GGA2		ENSG00000100664	EIF5
ENSG00000103381	CPPED1		ENSG00000100665	SERPINA4
ENSG00000103404	USP31		ENSG00000100678	SLC8A3
ENSG00000103449	SALL1		ENSG00000100697	DICER1
ENSG00000103460	TOX3		ENSG00000100714	MTHFD1
ENSG00000103479	RBL2		ENSG00000100721	TCL1A
ENSG00000103494	RPGRIP1L		ENSG00000100722	ZC3H14
ENSG00000103502	CDIPT		ENSG00000100731	PCNX1
ENSG00000103522	IL21R		ENSG00000100744	GSKIP
ENSG00000103528	SYT17		ENSG00000100784	RPS6KA5
ENSG00000103544	VPS35L		ENSG00000100796	PPP4R3A
ENSG00000103599	IQCH		ENSG00000100811	YY1
ENSG00000103642	LACTB		ENSG00000100813	ACIN1
ENSG00000103657	HERC1		ENSG00000100815	TRIP11
ENSG00000103671	TRIP4		ENSG00000100836	PABPN1
ENSG00000103707	MTFMT		ENSG00000100852	ARHGAP5
ENSG00000103723	AP3B2		ENSG00000100889	PCK2
ENSG00000103742	IGDCC4		ENSG00000100902	PSMA6
ENSG00000103769	RAB11A		ENSG00000100911	PSME2
ENSG00000103811	CTSH		ENSG00000100916	BRMS1L
ENSG00000103942	HOMER2		ENSG00000100934	SEC23A
ENSG00000103966	EHD4		ENSG00000100987	VSX1
ENSG00000103978	TMEM87A		ENSG00000101003	GINS1
ENSG00000103994	ZNF106		ENSG00000101019	UQCC1
ENSG00000103995	CEP152		ENSG00000101040	ZMYND8
ENSG00000104043	ATP8B4		ENSG00000101076	HNF4A
ENSG00000104047	DTWD1		ENSG00000101079	NDRG3
ENSG00000104067	TJP1		ENSG00000101082	SLA2
ENSG00000104133	SPG11		ENSG00000101084	RAB5IF
ENSG00000104147	OIP5		ENSG00000101096	NFATC2
ENSG00000104164	BLOC1S6		ENSG00000101104	PABPC1L
ENSG00000104177	MYEF2		ENSG00000101138	CSTF1
ENSG00000104218	CSPP1		ENSG00000101144	BMP7
ENSG00000104228	TRIM35		ENSG00000101146	RAE1
ENSG00000104237	RP1		ENSG00000101150	TPD52L2
ENSG00000104313	EYA1		ENSG00000101162	TUBB1
ENSG00000104325	DECR1		ENSG00000101182	PSMA7
ENSG00000104327	CALB1		ENSG00000101189	MRGBP
ENSG00000104343	UBE2W		ENSG00000101191	DIDO1
ENSG00000104381	GDAP1		ENSG00000101193	GID8
ENSG00000104388	RAB2A		ENSG00000101230	ISM1
ENSG00000104412	EMC2		ENSG00000101236	RNF24
ENSG00000104432	IL7		ENSG00000101247	NDUFAF5
ENSG00000104442	ARMC1		ENSG00000101251	SEL1L2
ENSG00000104447	TRPS1		ENSG00000101266	CSNK2A1
ENSG00000104472	CHRAC1		ENSG00000101290	CDS2
ENSG00000104537	ANXA13		ENSG00000101347	SAMHD1
ENSG00000104613	INTS10		ENSG00000101361	NOP56
ENSG00000104635	SLC39A14		ENSG00000101367	MAPRE1
ENSG00000104643	MTMR9		ENSG00000101384	JAG1
ENSG00000104691	UBXN8		ENSG00000101413	RPRD1B
ENSG00000104722	NEFM		ENSG00000101421	CHMP4B
ENSG00000104723	TUSC3		ENSG00000101447	FAM83D
ENSG00000104728	ARHGEF10		ENSG00000101474	APMAP
ENSG00000104731	KLHDC4		ENSG00000101493	ZNF516
ENSG00000104760	FGL1		ENSG00000101542	CDH20
ENSG00000104763	ASAH1		ENSG00000101544	ADNP2
ENSG00000104765	BNIP3L		ENSG00000101546	RBFA
ENSG00000104870	FCGRT		ENSG00000101557	USP14
ENSG00000104884	ERCC2		ENSG00000101558	VAPA
ENSG00000104889	RNASEH2A		ENSG00000101596	SMCHD1
ENSG00000104980	TIMM44		ENSG00000101624	CEP76
ENSG00000105085	MED26		ENSG00000101638	ST8SIA5
ENSG00000105088	OLFM2		ENSG00000101639	CEP192
ENSG00000105136	ZNF419		ENSG00000101654	RNMT
ENSG00000105176	URI1		ENSG00000101670	LIPG
ENSG00000105185	PDCD5		ENSG00000101695	RNF125
ENSG00000105186	ANKRD27		ENSG00000101745	ANKRD12
ENSG00000105221	AKT2		ENSG00000101751	POLI
ENSG00000105323	HNRNPUL1		ENSG00000101752	MIB1
ENSG00000105357	MYH14		ENSG00000101825	MXRA5
ENSG00000105366	SIGLEC8		ENSG00000101842	VSIG1
ENSG00000105392	CRX		ENSG00000101844	ATG4A
ENSG00000105393	BABAM1		ENSG00000101846	STS
ENSG00000105429	MEGF8		ENSG00000101849	TBL1X
ENSG00000105438	KDELR1		ENSG00000101871	MID1
ENSG00000105447	GRWD1		ENSG00000101882	NKAP
ENSG00000105483	CARD8		ENSG00000101892	ATP1B4
ENSG00000105497	ZNF175		ENSG00000101901	ALG13
ENSG00000105514	RAB3D		ENSG00000101911	PRPS2
ENSG00000105556	MIER2		ENSG00000101928	MOSPD1
ENSG00000105568	PPP2R1A		ENSG00000101938	CHRDL1
ENSG00000105576	TNPO2		ENSG00000101951	PAGE4
ENSG00000105639	JAK3		ENSG00000101958	GLRA2
ENSG00000105656	ELL		ENSG00000101966	XIAP
ENSG00000105698	USF2		ENSG00000101972	STAG2
ENSG00000105705	SUGP1		ENSG00000101974	ATP11C
ENSG00000105711	SCN1B		ENSG00000101977	MCF2
ENSG00000105738	SIPA1L3		ENSG00000102024	PLS3
ENSG00000105771	SMG9		ENSG00000102053	ZC3H12B
ENSG00000105778	AVL9		ENSG00000102078	SLC25A14
ENSG00000105784	RUNDC3B		ENSG00000102098	SCML2
ENSG00000105792	CFAP69		ENSG00000102100	SLC35A2
ENSG00000105793	GTPBP10		ENSG00000102158	MAGT1
ENSG00000105810	CDK6		ENSG00000102181	CD99L2
ENSG00000105819	PMPCB		ENSG00000102189	EEA1
ENSG00000105821	DNAJC2		ENSG00000102218	RP2
ENSG00000105829	BET1		ENSG00000102221	JADE3
ENSG00000105835	NAMPT		ENSG00000102225	CDK16
ENSG00000105866	SP4		ENSG00000102230	PCYT1B
ENSG00000105879	CBLL1		ENSG00000102245	CD40LG
ENSG00000105880	DLX5		ENSG00000102271	KLHL4
ENSG00000105887	MTPN		ENSG00000102290	PCDH11X
ENSG00000105928	GSDME		ENSG00000102309	PIN4
ENSG00000105939	ZC3HAV1		ENSG00000102313	ITIH6
ENSG00000105967	TFEC		ENSG00000102317	RBM3
ENSG00000105971	CAV2		ENSG00000102349	KLF8
ENSG00000105974	CAV1		ENSG00000102359	SRPX2
ENSG00000105982	RNF32		ENSG00000102362	SYTL4
ENSG00000105983	LMBR1		ENSG00000102383	ZDHHC15
ENSG00000105993	DNAJB6		ENSG00000102385	DRP2
ENSG00000106031	HOXA13		ENSG00000102390	PBDC1
ENSG00000106049	HIBADH		ENSG00000102401	ARMCX3
ENSG00000106052	TAX1BP1		ENSG00000102445	RUBCNL
ENSG00000106066	CPVL		ENSG00000102452	NALCN
ENSG00000106069	CHN2		ENSG00000102466	FGF14
ENSG00000106070	GRB10		ENSG00000102468	HTR2A
ENSG00000106080	FKBP14		ENSG00000102471	NDFIP2
ENSG00000106086	PLEKHA8		ENSG00000102524	TNFSF13B
ENSG00000106144	CASP2		ENSG00000102531	FNDC3A
ENSG00000106246	PTCD1		ENSG00000102572	STK24
ENSG00000106258	CYP3A5		ENSG00000102580	DNAJC3
ENSG00000106261	ZKSCAN1		ENSG00000102595	UGGT2
ENSG00000106278	PTPRZ1		ENSG00000102606	ARHGEF7
ENSG00000106299	WASL		ENSG00000102710	SUPT20H
ENSG00000106305	AIMP2		ENSG00000102753	KPNA3
ENSG00000106328	FSCN3		ENSG00000102780	DGKH
ENSG00000106330	MOSPD3		ENSG00000102781	KATNAL1
ENSG00000106341	PPP1R17		ENSG00000102786	INTS6
ENSG00000106344	RBM28		ENSG00000102805	CLN5
ENSG00000106346	USP42		ENSG00000102893	PHKB
ENSG00000106392	C1GALT1		ENSG00000102897	LYRM1
ENSG00000106397	PLOD3		ENSG00000102901	CENPT
ENSG00000106415	GLCCI1		ENSG00000102908	NFAT5
ENSG00000106443	PHF14		ENSG00000102910	LONP2
ENSG00000106460	TMEM106B		ENSG00000102921	N4BP1
ENSG00000106462	EZH2		ENSG00000102934	PLLP
ENSG00000106479	ZNF862		ENSG00000103018	CYB5B
ENSG00000106524	ANKMY2		ENSG00000103034	NDRG4
ENSG00000106526	ACTR3C		ENSG00000103037	SETD6
ENSG00000106537	TSPAN13		ENSG00000103044	HAS3
ENSG00000106554	CHCHD3		ENSG00000103047	TANGO6
ENSG00000106588	PSMA2		ENSG00000103056	SMPD3
ENSG00000106591	MRPL32		ENSG00000103061	SLC7A6OS
ENSG00000106688	SLC1A1		ENSG00000103064	SLC7A6
ENSG00000106701	FSD1L		ENSG00000103091	WDR59
ENSG00000106733	NMRK1		ENSG00000103111	MON1B
ENSG00000106771	TMEM245		ENSG00000103121	CMC2
ENSG00000106772	PRUNE2		ENSG00000103150	MLYCD
ENSG00000106789	CORO2A		ENSG00000103160	HSDL1
ENSG00000106823	ECM2		ENSG00000103187	COTL1
ENSG00000106948	AKNA		ENSG00000103194	USP10
ENSG00000106976	DNM1		ENSG00000103248	MTHFSD
ENSG00000107036	RIC1		ENSG00000103316	CRYM
ENSG00000107077	KDM4C		ENSG00000103319	EEF2K
ENSG00000107099	DOCK8		ENSG00000103353	UBFD1
ENSG00000107159	CA9		ENSG00000103365	GGA2
ENSG00000107186	MPDZ		ENSG00000103375	AQP8
ENSG00000107201	DDX58		ENSG00000103381	CPPED1
ENSG00000107290	SETX		ENSG00000103404	USP31
ENSG00000107362	ABHD17B		ENSG00000103423	DNAJA3
ENSG00000107372	ZFAND5		ENSG00000103460	TOX3
ENSG00000107485	GATA3		ENSG00000103489	XYLT1
ENSG00000107518	ATRNL1		ENSG00000103494	RPGRIP1L
ENSG00000107521	HPS1		ENSG00000103495	MAZ
ENSG00000107560	RAB11FIP2		ENSG00000103546	SLC6A2
ENSG00000107562	CXCL12		ENSG00000103591	AAGAB
ENSG00000107614	TRDMT1		ENSG00000103642	LACTB
ENSG00000107625	DDX50		ENSG00000103647	CORO2B
ENSG00000107643	MAPK8		ENSG00000103723	AP3B2
ENSG00000107651	SEC23IP		ENSG00000103742	IGDCC4
ENSG00000107679	PLEKHA1		ENSG00000103769	RAB11A
ENSG00000107771	CCSER2		ENSG00000103811	CTSH
ENSG00000107779	BMPR1A		ENSG00000103888	CEMIP
ENSG00000107864	CPEB3		ENSG00000103942	HOMER2
ENSG00000107897	ACBD5		ENSG00000103978	TMEM87A
ENSG00000107929	LARP4B		ENSG00000103995	CEP152
ENSG00000107938	EDRF1		ENSG00000104043	ATP8B4
ENSG00000107949	BCCIP		ENSG00000104047	DTWD1
ENSG00000107951	MTPAP		ENSG00000104064	GABPB1
ENSG00000108001	EBF3		ENSG00000104067	TJP1
ENSG00000108010	GLRX3		ENSG00000104093	DMXL2
ENSG00000108018	SORCS1		ENSG00000104154	SLC30A4
ENSG00000108021	TASOR2		ENSG00000104164	BLOC1S6
ENSG00000108064	TFAM		ENSG00000104177	MYEF2
ENSG00000108091	CCDC6		ENSG00000104218	CSPP1
ENSG00000108094	CUL2		ENSG00000104228	TRIM35
ENSG00000108176	DNAJC12		ENSG00000104231	ZFAND1
ENSG00000108179	PPIF		ENSG00000104237	RP1
ENSG00000108219	TSPAN14		ENSG00000104267	CA2
ENSG00000108231	LGI1		ENSG00000104290	FZD3
ENSG00000108244	KRT23		ENSG00000104312	RIPK2
ENSG00000108256	NUFIP2		ENSG00000104313	EYA1
ENSG00000108306	FBXL20		ENSG00000104320	NBN
ENSG00000108375	RNF43		ENSG00000104321	TRPA1
ENSG00000108384	RAD51C		ENSG00000104324	CPQ
ENSG00000108395	TRIM37		ENSG00000104325	DECR1
ENSG00000108433	GOSR2		ENSG00000104331	IMPAD1
ENSG00000108443	RPS6KB1		ENSG00000104332	SFRP1
ENSG00000108474	PIGL		ENSG00000104341	LAPTM4B
ENSG00000108506	INTS2		ENSG00000104343	UBE2W
ENSG00000108515	ENO3		ENSG00000104361	NIPAL2
ENSG00000108576	SLC6A4		ENSG00000104365	IKBKB
ENSG00000108582	CPD		ENSG00000104375	STK3
ENSG00000108591	DRG2		ENSG00000104388	RAB2A
ENSG00000108599	AKAP10		ENSG00000104412	EMC2
ENSG00000108651	UTP6		ENSG00000104413	ESRP1
ENSG00000108654	DDX5		ENSG00000104415	CCN4
ENSG00000108671	PSMD11		ENSG00000104419	NDRG1
ENSG00000108788	MLX		ENSG00000104432	IL7
ENSG00000108823	SGCA		ENSG00000104447	TRPS1
ENSG00000108829	LRRC59		ENSG00000104450	SPAG1
ENSG00000108830	RND2		ENSG00000104490	NCALD
ENSG00000108840	HDAC5		ENSG00000104497	SNX16
ENSG00000108846	ABCC3		ENSG00000104611	SH2D4A
ENSG00000108848	LUC7L3		ENSG00000104643	MTMR9
ENSG00000108854	SMURF2		ENSG00000104687	GSR
ENSG00000108946	PRKAR1A		ENSG00000104723	TUSC3
ENSG00000108953	YWHAE		ENSG00000104728	ARHGEF10
ENSG00000108960	MMD		ENSG00000104731	KLHDC4
ENSG00000108984	MAP2K6		ENSG00000104756	KCTD9
ENSG00000109046	WSB1		ENSG00000104763	ASAH1
ENSG00000109047	RCVRN		ENSG00000104812	GYS1
ENSG00000109113	RAB34		ENSG00000104825	NFKBIB
ENSG00000109118	PHF12		ENSG00000104848	KCNA7
ENSG00000109133	TMEM33		ENSG00000104889	RNASEH2A
ENSG00000109158	GABRA4		ENSG00000104938	CLEC4M
ENSG00000109171	SLAIN2		ENSG00000104973	MED25
ENSG00000109182	CWH43		ENSG00000104974	LILRA1
ENSG00000109184	DCUN1D4		ENSG00000105053	VRK3
ENSG00000109270	LAMTOR3		ENSG00000105085	MED26
ENSG00000109323	MANBA		ENSG00000105136	ZNF419
ENSG00000109436	TBC1D9		ENSG00000105171	POP4
ENSG00000109445	ZNF330		ENSG00000105176	URI1
ENSG00000109452	INPP4B		ENSG00000105221	AKT2
ENSG00000109458	GAB1		ENSG00000105323	HNRNPUL1
ENSG00000109472	CPE		ENSG00000105339	DENND3
ENSG00000109572	CLCN3		ENSG00000105388	CEACAM5
ENSG00000109618	SEPSECS		ENSG00000105486	LIG1
ENSG00000109625	CPZ		ENSG00000105497	ZNF175
ENSG00000109684	CLNK		ENSG00000105514	RAB3D
ENSG00000109685	NSD2		ENSG00000105568	PPP2R1A
ENSG00000109689	STIM2		ENSG00000105576	TNPO2
ENSG00000109738	GLRB		ENSG00000105656	ELL
ENSG00000109756	RAPGEF2		ENSG00000105662	CRTC1
ENSG00000109762	SNX25		ENSG00000105705	SUGP1
ENSG00000109787	KLF3		ENSG00000105717	PBX4
ENSG00000109794	FAM149A		ENSG00000105778	AVL9
ENSG00000109805	NCAPG		ENSG00000105784	RUNDC3B
ENSG00000109819	PPARGC1A		ENSG00000105792	CFAP69
ENSG00000109832	DDX25		ENSG00000105793	GTPBP10
ENSG00000109861	CTSC		ENSG00000105810	CDK6
ENSG00000109906	ZBTB16		ENSG00000105825	TFPI2
ENSG00000109911	ELP4		ENSG00000105849	TWISTNB
ENSG00000109917	ZPR1		ENSG00000105851	PIK3CG
ENSG00000109920	FNBP4		ENSG00000105856	HBP1
ENSG00000109929	SC5D		ENSG00000105865	DUS4L
ENSG00000109956	B3GAT1		ENSG00000105866	SP4
ENSG00000110002	VWA5A		ENSG00000105926	MPP6
ENSG00000110063	DCPS		ENSG00000105939	ZC3HAV1
ENSG00000110066	KMT5B		ENSG00000105948	TTC26
ENSG00000110075	PPP6R3		ENSG00000105967	TFEC
ENSG00000110092	CCND1		ENSG00000105968	H2AZ2
ENSG00000110315	RNF141		ENSG00000105974	CAV1
ENSG00000110324	IL10RA		ENSG00000105976	MET
ENSG00000110344	UBE4A		ENSG00000105982	RNF32
ENSG00000110395	CBL		ENSG00000105983	LMBR1
ENSG00000110422	HIPK3		ENSG00000105989	WNT2
ENSG00000110427	KIAA1549L		ENSG00000105993	DNAJB6
ENSG00000110455	ACCS		ENSG00000106012	IQCE
ENSG00000110660	SLC35F2		ENSG00000106034	CPED1
ENSG00000110693	SOX6		ENSG00000106052	TAX1BP1
ENSG00000110713	NUP98		ENSG00000106066	CPVL
ENSG00000110721	CHKA		ENSG00000106070	GRB10
ENSG00000110768	GTF2H1		ENSG00000106078	COBL
ENSG00000110844	PRPF40B		ENSG00000106086	PLEKHA8
ENSG00000110851	PRDM4		ENSG00000106244	PDAP1
ENSG00000110852	CLEC2B		ENSG00000106258	CYP3A5
ENSG00000110881	ASIC1		ENSG00000106261	ZKSCAN1
ENSG00000110888	CAPRIN2		ENSG00000106299	WASL
ENSG00000110925	CSRNP2		ENSG00000106344	RBM28
ENSG00000110958	PTGES3		ENSG00000106443	PHF14
ENSG00000110975	SYT10		ENSG00000106459	NRF1
ENSG00000111011	RSRC2		ENSG00000106460	TMEM106B
ENSG00000111052	LIN7A		ENSG00000106462	EZH2
ENSG00000111058	ACSS3		ENSG00000106477	CEP41
ENSG00000111110	PPM1H		ENSG00000106526	ACTR3C
ENSG00000111196	MAGOHB		ENSG00000106536	POU6F2
ENSG00000111224	PARP11		ENSG00000106546	AHR
ENSG00000111237	VPS29		ENSG00000106571	GLI3
ENSG00000111252	SH2B3		ENSG00000106588	PSMA2
ENSG00000111261	MANSC1		ENSG00000106591	MRPL32
ENSG00000111266	DUSP16		ENSG00000106603	COA1
ENSG00000111276	CDKN1B		ENSG00000106609	TMEM248
ENSG00000111300	NAA25		ENSG00000106617	PRKAG2
ENSG00000111331	OAS3		ENSG00000106636	YKT6
ENSG00000111335	OAS2		ENSG00000106638	TBL2
ENSG00000111358	GTF2H3		ENSG00000106682	EIF4H
ENSG00000111361	EIF2B1		ENSG00000106686	SPATA6L
ENSG00000111412	C12orf49		ENSG00000106692	FKTN
ENSG00000111432	FZD10		ENSG00000106701	FSD1L
ENSG00000111490	TBC1D30		ENSG00000106714	CNTNAP3
ENSG00000111530	CAND1		ENSG00000106723	SPIN1
ENSG00000111581	NUP107		ENSG00000106733	NMRK1
ENSG00000111596	CNOT2		ENSG00000106771	TMEM245
ENSG00000111615	KRR1		ENSG00000106772	PRUNE2
ENSG00000111653	ING4		ENSG00000106780	MEGF9
ENSG00000111666	CHPT1		ENSG00000106799	TGFBR1
ENSG00000111670	GNPTAB		ENSG00000106809	OGN
ENSG00000111700	SLCO1B3		ENSG00000106823	ECM2
ENSG00000111727	HCFC2		ENSG00000106976	DNM1
ENSG00000111728	ST8SIA1		ENSG00000106993	CDC37L1
ENSG00000111732	AICDA		ENSG00000107036	RIC1
ENSG00000111752	PHC1		ENSG00000107077	KDM4C
ENSG00000111790	FGFR1OP2		ENSG00000107099	DOCK8
ENSG00000111801	BTN3A3		ENSG00000107105	ELAVL2
ENSG00000111816	FRK		ENSG00000107130	NCS1
ENSG00000111817	DSE		ENSG00000107165	TYRP1
ENSG00000111832	RWDD1		ENSG00000107186	MPDZ
ENSG00000111837	MAK		ENSG00000107201	DDX58
ENSG00000111850	SMIM8		ENSG00000107249	GLIS3
ENSG00000111860	CEP85L		ENSG00000107282	APBA1
ENSG00000111879	FAM184A		ENSG00000107290	SETX
ENSG00000111886	GABRR2		ENSG00000107372	ZFAND5
ENSG00000111907	TPD52L1		ENSG00000107485	GATA3
ENSG00000111911	HINT3		ENSG00000107554	DNMBP
ENSG00000111912	NCOA7		ENSG00000107560	RAB11FIP2
ENSG00000111981	ULBP1		ENSG00000107614	TRDMT1
ENSG00000112038	OPRM1		ENSG00000107643	MAPK8
ENSG00000112053	SLC26A8		ENSG00000107651	SEC23IP
ENSG00000112062	MAPK14		ENSG00000107669	ATE1
ENSG00000112079	STK38		ENSG00000107679	PLEKHA1
ENSG00000112096	SOD2		ENSG00000107736	CDH23
ENSG00000112137	PHACTR1		ENSG00000107771	CCSER2
ENSG00000112139	MDGA1		ENSG00000107779	BMPR1A
ENSG00000112164	GLP1R		ENSG00000107807	TLX1
ENSG00000112182	BACH2		ENSG00000107864	CPEB3
ENSG00000112186	CAP2		ENSG00000107890	ANKRD26
ENSG00000112200	ZNF451		ENSG00000107937	GTPBP4
ENSG00000112218	GPR63		ENSG00000107938	EDRF1
ENSG00000112234	FBXL4		ENSG00000108018	SORCS1
ENSG00000112237	CCNC		ENSG00000108061	SHOC2
ENSG00000112238	PRDM13		ENSG00000108064	TFAM
ENSG00000112242	E2F3		ENSG00000108091	CCDC6
ENSG00000112246	SIM1		ENSG00000108107	RPL28
ENSG00000112249	ASCC3		ENSG00000108219	TSPAN14
ENSG00000112273	HDGFL1		ENSG00000108231	LGI1
ENSG00000112294	ALDH5A1		ENSG00000108239	TBC1D12
ENSG00000112305	SMAP1		ENSG00000108256	NUFIP2
ENSG00000112308	C6orf62		ENSG00000108306	FBXL20
ENSG00000112319	EYA4		ENSG00000108381	ASPA
ENSG00000112320	SOBP		ENSG00000108384	RAD51C
ENSG00000112333	NR2E1		ENSG00000108395	TRIM37
ENSG00000112337	SLC17A2		ENSG00000108406	DHX40
ENSG00000112343	TRIM38		ENSG00000108423	TUBD1
ENSG00000112367	FIG4		ENSG00000108439	PNPO
ENSG00000112378	PERP		ENSG00000108443	RPS6KB1
ENSG00000112394	SLC16A10		ENSG00000108468	CBX1
ENSG00000112406	HECA		ENSG00000108469	RECQL5
ENSG00000112419	PHACTR2		ENSG00000108474	PIGL
ENSG00000112425	EPM2A		ENSG00000108506	INTS2
ENSG00000112530	PACRG		ENSG00000108510	MED13
ENSG00000112531	QKI		ENSG00000108518	PFN1
ENSG00000112541	PDE10A		ENSG00000108578	BLMH
ENSG00000112562	SMOC2		ENSG00000108582	CPD
ENSG00000112584	FAM120B		ENSG00000108587	GOSR1
ENSG00000112640	PPP2R5D		ENSG00000108599	AKAP10
ENSG00000112679	DUSP22		ENSG00000108671	PSMD11
ENSG00000112701	SENP6		ENSG00000108688	CCL7
ENSG00000112739	PRPF4B		ENSG00000108733	PEX12
ENSG00000112782	CLIC5		ENSG00000108759	KRT32
ENSG00000112812	PRSS16		ENSG00000108799	EZH1
ENSG00000112852	PCDHB2		ENSG00000108830	RND2
ENSG00000112902	SEMA5A		ENSG00000108846	ABCC3
ENSG00000112936	C7		ENSG00000108848	LUC7L3
ENSG00000112992	NNT		ENSG00000108854	SMURF2
ENSG00000113161	HMGCR		ENSG00000108946	PRKAR1A
ENSG00000113163	CERT1		ENSG00000108950	FAM20A
ENSG00000113194	FAF2		ENSG00000108953	YWHAE
ENSG00000113262	GRM6		ENSG00000108960	MMD
ENSG00000113269	RNF130		ENSG00000108984	MAP2K6
ENSG00000113272	THG1L		ENSG00000109016	DHRS7B
ENSG00000113273	ARSB		ENSG00000109101	FOXN1
ENSG00000113300	CNOT6		ENSG00000109111	SUPT6H
ENSG00000113318	MSH3		ENSG00000109118	PHF12
ENSG00000113319	RASGRF2		ENSG00000109133	TMEM33
ENSG00000113327	GABRG2		ENSG00000109158	GABRA4
ENSG00000113356	POLR3G		ENSG00000109163	GNRHR
ENSG00000113361	CDH6		ENSG00000109171	SLAIN2
ENSG00000113368	LMNB1		ENSG00000109180	OCIAD1
ENSG00000113384	GOLPH3		ENSG00000109181	UGT2B10
ENSG00000113387	SUB1		ENSG00000109184	DCUN1D4
ENSG00000113389	NPR3		ENSG00000109193	SULT1E1
ENSG00000113441	LNPEP		ENSG00000109255	NMU
ENSG00000113456	RAD1		ENSG00000109323	MANBA
ENSG00000113494	PRLR		ENSG00000109381	ELF2
ENSG00000113522	RAD50		ENSG00000109445	ZNF330
ENSG00000113532	ST8SIA4		ENSG00000109452	INPP4B
ENSG00000113555	PCDH12		ENSG00000109458	GAB1
ENSG00000113558	SKP1		ENSG00000109475	RPL34
ENSG00000113569	NUP155		ENSG00000109519	GRPEL1
ENSG00000113575	PPP2CA		ENSG00000109534	GAR1
ENSG00000113580	NR3C1		ENSG00000109572	CLCN3
ENSG00000113593	PPWD1		ENSG00000109654	TRIM2
ENSG00000113594	LIFR		ENSG00000109670	FBXW7
ENSG00000113597	TRAPPC13		ENSG00000109680	TBC1D19
ENSG00000113600	C9		ENSG00000109684	CLNK
ENSG00000113615	SEC24A		ENSG00000109685	NSD2
ENSG00000113638	TTC33		ENSG00000109689	STIM2
ENSG00000113648	MACROH2A1		ENSG00000109743	BST1
ENSG00000113649	TCERG1		ENSG00000109771	LRP2BP
ENSG00000113712	CSNK1A1		ENSG00000109787	KLF3
ENSG00000113719	ERGIC1		ENSG00000109814	UGDH
ENSG00000113722	CDX1		ENSG00000109819	PPARGC1A
ENSG00000113732	ATP6V0E1		ENSG00000109832	DDX25
ENSG00000113734	BNIP1		ENSG00000109846	CRYAB
ENSG00000113742	CPEB4		ENSG00000109906	ZBTB16
ENSG00000113749	HRH2		ENSG00000109911	ELP4
ENSG00000113805	CNTN3		ENSG00000109929	SC5D
ENSG00000113812	ACTR8		ENSG00000109943	CRTAM
ENSG00000113838	TBCCD1		ENSG00000109956	B3GAT1
ENSG00000113851	CRBN		ENSG00000110002	VWA5A
ENSG00000113966	ARL6		ENSG00000110013	SIAE
ENSG00000113971	NPHP3		ENSG00000110047	EHD1
ENSG00000114013	CD86		ENSG00000110066	KMT5B
ENSG00000114021	NIT2		ENSG00000110075	PPP6R3
ENSG00000114062	UBE3A		ENSG00000110148	CCKBR
ENSG00000114098	ARMC8		ENSG00000110172	CHORDC1
ENSG00000114115	RBP1		ENSG00000110200	ANAPC15
ENSG00000114120	SLC25A36		ENSG00000110218	PANX1
ENSG00000114126	TFDP2		ENSG00000110315	RNF141
ENSG00000114127	XRN1		ENSG00000110318	CEP126
ENSG00000114302	PRKAR2A		ENSG00000110321	EIF4G2
ENSG00000114316	USP4		ENSG00000110344	UBE4A
ENSG00000114331	ACAP2		ENSG00000110367	DDX6
ENSG00000114383	TUSC2		ENSG00000110395	CBL
ENSG00000114416	FXR1		ENSG00000110422	HIPK3
ENSG00000114439	BBX		ENSG00000110429	FBXO3
ENSG00000114450	GNB4		ENSG00000110436	SLC1A2
ENSG00000114491	UMPS		ENSG00000110442	COMMD9
ENSG00000114520	SNX4		ENSG00000110455	ACCS
ENSG00000114656	KIAA1257		ENSG00000110497	AMBRA1
ENSG00000114739	ACVR2B		ENSG00000110583	NAA40
ENSG00000114742	WDR48		ENSG00000110619	CARS1
ENSG00000114757	PEX5L		ENSG00000110693	SOX6
ENSG00000114779	ABHD14B		ENSG00000110696	C11orf58
ENSG00000114790	ARHGEF26		ENSG00000110713	NUP98
ENSG00000114796	KLHL24		ENSG00000110723	EXPH5
ENSG00000114857	NKTR		ENSG00000110756	HPS5
ENSG00000114861	FOXP1		ENSG00000110799	VWF
ENSG00000114904	NEK4		ENSG00000110801	PSMD9
ENSG00000114933	INO80D		ENSG00000110888	CAPRIN2
ENSG00000114978	MOB1A		ENSG00000110900	TSPAN11
ENSG00000114999	TTL		ENSG00000110906	KCTD10
ENSG00000115008	IL1A		ENSG00000110911	SLC11A2
ENSG00000115009	CCL20		ENSG00000110917	MLEC
ENSG00000115042	FAHD2A		ENSG00000110925	CSRNP2
ENSG00000115084	SLC35F5		ENSG00000110958	PTGES3
ENSG00000115091	ACTR3		ENSG00000111011	RSRC2
ENSG00000115112	TFCP2L1		ENSG00000111012	CYP27B1
ENSG00000115145	STAM2		ENSG00000111049	MYF5
ENSG00000115159	GPD2		ENSG00000111058	ACSS3
ENSG00000115163	CENPA		ENSG00000111110	PPM1H
ENSG00000115165	CYTIP		ENSG00000111145	ELK3
ENSG00000115232	ITGA4		ENSG00000111196	MAGOHB
ENSG00000115234	SNX17		ENSG00000111203	ITFG2
ENSG00000115282	TTC31		ENSG00000111206	FOXM1
ENSG00000115295	CLIP4		ENSG00000111218	PRMT8
ENSG00000115339	GALNT3		ENSG00000111224	PARP11
ENSG00000115355	CCDC88A		ENSG00000111252	SH2B3
ENSG00000115364	MRPL19		ENSG00000111266	DUSP16
ENSG00000115368	WDR75		ENSG00000111300	NAA25
ENSG00000115415	STAT1		ENSG00000111331	OAS3
ENSG00000115419	GLS		ENSG00000111335	OAS2
ENSG00000115421	PAPOLG		ENSG00000111339	ART4
ENSG00000115468	EFHD1		ENSG00000111344	RASAL1
ENSG00000115486	GGCX		ENSG00000111412	C12orf49
ENSG00000115504	EHBP1		ENSG00000111450	STX2
ENSG00000115514	TXNDC9		ENSG00000111481	COPZ1
ENSG00000115524	SF3B1		ENSG00000111530	CAND1
ENSG00000115540	MOB4		ENSG00000111540	RAB5B
ENSG00000115548	KDM3A		ENSG00000111554	MDM1
ENSG00000115561	CHMP3		ENSG00000111581	NUP107
ENSG00000115602	IL1RL1		ENSG00000111596	CNOT2
ENSG00000115616	SLC9A2		ENSG00000111605	CPSF6
ENSG00000115738	ID2		ENSG00000111615	KRR1
ENSG00000115750	TAF1B		ENSG00000111642	CHD4
ENSG00000115762	PLEKHB2		ENSG00000111669	TPI1
ENSG00000115806	GORASP2		ENSG00000111674	ENO2
ENSG00000115808	STRN		ENSG00000111684	LPCAT3
ENSG00000115825	PRKD3		ENSG00000111707	SUDS3
ENSG00000115839	RAB3GAP1		ENSG00000111711	GOLT1B
ENSG00000115840	SLC25A12		ENSG00000111727	HCFC2
ENSG00000115866	DARS1		ENSG00000111728	ST8SIA1
ENSG00000115875	SRSF7		ENSG00000111752	PHC1
ENSG00000115884	SDC1		ENSG00000111790	FGFR1OP2
ENSG00000115896	PLCL1		ENSG00000111799	COL12A1
ENSG00000115902	SLC1A4		ENSG00000111816	FRK
ENSG00000115919	KYNU		ENSG00000111817	DSE
ENSG00000115935	WIPF1		ENSG00000111832	RWDD1
ENSG00000115944	COX7A2L		ENSG00000111846	GCNT2
ENSG00000115946	PNO1		ENSG00000111860	CEP85L
ENSG00000115947	ORC4		ENSG00000111863	ADTRP
ENSG00000115966	ATF2		ENSG00000111879	FAM184A
ENSG00000115970	THADA		ENSG00000111897	SERINC1
ENSG00000115977	AAK1		ENSG00000111911	HINT3
ENSG00000115993	TRAK2		ENSG00000111913	RIPOR2
ENSG00000116001	TIA1		ENSG00000111961	SASH1
ENSG00000116005	PCYOX1		ENSG00000111981	ULBP1
ENSG00000116016	EPAS1		ENSG00000112038	OPRM1
ENSG00000116017	ARID3A		ENSG00000112062	MAPK14
ENSG00000116030	SUMO1		ENSG00000112078	KCTD20
ENSG00000116062	MSH6		ENSG00000112079	STK38
ENSG00000116095	PLEKHA3		ENSG00000112081	SRSF3
ENSG00000116120	FARSB		ENSG00000112096	SOD2
ENSG00000116138	DNAJC16		ENSG00000112139	MDGA1
ENSG00000116147	TNR		ENSG00000112144	ICK
ENSG00000116161	CACYBP		ENSG00000112149	CD83
ENSG00000116183	PAPPA2		ENSG00000112182	BACH2
ENSG00000116191	RALGPS2		ENSG00000112183	RBM24
ENSG00000116198	CEP104		ENSG00000112186	CAP2
ENSG00000116205	TCEANC2		ENSG00000112200	ZNF451
ENSG00000116251	RPL22		ENSG00000112208	BAG2
ENSG00000116260	QSOX1		ENSG00000112210	RAB23
ENSG00000116299	KIAA1324		ENSG00000112218	GPR63
ENSG00000116329	OPRD1		ENSG00000112232	KHDRBS2
ENSG00000116406	EDEM3		ENSG00000112234	FBXL4
ENSG00000116473	RAP1A		ENSG00000112238	PRDM13
ENSG00000116539	ASH1L		ENSG00000112246	SIM1
ENSG00000116560	SFPQ		ENSG00000112249	ASCC3
ENSG00000116574	RHOU		ENSG00000112276	BVES
ENSG00000116580	GON4L		ENSG00000112280	COL9A1
ENSG00000116641	DOCK7		ENSG00000112293	GPLD1
ENSG00000116667	C1orf21		ENSG00000112297	CRYBG1
ENSG00000116675	DNAJC6		ENSG00000112303	VNN2
ENSG00000116678	LEPR		ENSG00000112304	ACOT13
ENSG00000116704	SLC35D1		ENSG00000112308	C6orf62
ENSG00000116731	PRDM2		ENSG00000112309	B3GAT2
ENSG00000116747	RO60		ENSG00000112319	EYA4
ENSG00000116748	AMPD1		ENSG00000112320	SOBP
ENSG00000116750	UCHL5		ENSG00000112339	HBS1L
ENSG00000116752	BCAS2		ENSG00000112343	TRIM38
ENSG00000116771	AGMAT		ENSG00000112379	ARFGEF3
ENSG00000116815	CD58		ENSG00000112394	SLC16A10
ENSG00000116830	TTF2		ENSG00000112406	HECA
ENSG00000116852	KIF21B		ENSG00000112419	PHACTR2
ENSG00000116922	C1orf109		ENSG00000112530	PACRG
ENSG00000116977	LGALS8		ENSG00000112531	QKI
ENSG00000116984	MTR		ENSG00000112541	PDE10A
ENSG00000116985	BMP8B		ENSG00000112584	FAM120B
ENSG00000116990	MYCL		ENSG00000112640	PPP2R5D
ENSG00000117009	KMO		ENSG00000112655	PTK7
ENSG00000117020	AKT3		ENSG00000112659	CUL9
ENSG00000117036	ETV3		ENSG00000112685	EXOC2
ENSG00000117069	ST6GALNAC5		ENSG00000112695	COX7A2
ENSG00000117090	SLAMF1		ENSG00000112701	SENP6
ENSG00000117114	ADGRL2		ENSG00000112739	PRPF4B
ENSG00000117133	RPF1		ENSG00000112763	BTN2A1
ENSG00000117139	KDM5B		ENSG00000112773	TENT5A
ENSG00000117152	RGS4		ENSG00000112782	CLIC5
ENSG00000117174	ZNHIT6		ENSG00000112796	ENPP5
ENSG00000117222	RBBP5		ENSG00000112837	TBX18
ENSG00000117280	RAB29		ENSG00000112851	ERBIN
ENSG00000117400	MPL		ENSG00000112852	PCDHB2
ENSG00000117425	PTCH2		ENSG00000112874	NUDT12
ENSG00000117461	PIK3R3		ENSG00000112902	SEMA5A
ENSG00000117475	BLZF1		ENSG00000112936	C7
ENSG00000117500	TMED5		ENSG00000112972	HMGCS1
ENSG00000117505	DR1		ENSG00000112977	DAP
ENSG00000117523	PRRC2C		ENSG00000112983	BRD8
ENSG00000117525	F3		ENSG00000112992	NNT
ENSG00000117543	DPH5		ENSG00000113013	HSPA9
ENSG00000117569	PTBP2		ENSG00000113048	MRPS27
ENSG00000117586	TNFSF4		ENSG00000113083	LOX
ENSG00000117592	PRDX6		ENSG00000113119	TMCO6
ENSG00000117593	DARS2		ENSG00000113140	SPARC
ENSG00000117595	IRF6		ENSG00000113163	CERT1
ENSG00000117597	UTP25		ENSG00000113194	FAF2
ENSG00000117598	PLPPR5		ENSG00000113196	HAND1
ENSG00000117602	RCAN3		ENSG00000113231	PDE8B
ENSG00000117616	RSRP1		ENSG00000113240	CLK4
ENSG00000117620	SLC35A3		ENSG00000113272	THG1L
ENSG00000117632	STMN1		ENSG00000113273	ARSB
ENSG00000117643	MAN1C1		ENSG00000113282	CLINT1
ENSG00000117697	NSL1		ENSG00000113300	CNOT6
ENSG00000117707	PROX1		ENSG00000113302	IL12B
ENSG00000117758	STX12		ENSG00000113318	MSH3
ENSG00000117834	SLC5A9		ENSG00000113319	RASGRF2
ENSG00000117862	TXNDC12		ENSG00000113327	GABRG2
ENSG00000117877	CD3EAP		ENSG00000113328	CCNG1
ENSG00000118007	STAG1		ENSG00000113356	POLR3G
ENSG00000118058	KMT2A		ENSG00000113361	CDH6
ENSG00000118217	ATF6		ENSG00000113368	LMNB1
ENSG00000118257	NRP2		ENSG00000113369	ARRDC3
ENSG00000118271	TTR		ENSG00000113389	NPR3
ENSG00000118276	B4GALT6		ENSG00000113391	FAM172A
ENSG00000118298	CA14		ENSG00000113407	TARS1
ENSG00000118322	ATP10B		ENSG00000113441	LNPEP
ENSG00000118407	FILIP1		ENSG00000113448	PDE4D
ENSG00000118420	UBE3D		ENSG00000113456	RAD1
ENSG00000118473	SGIP1		ENSG00000113494	PRLR
ENSG00000118482	PHF3		ENSG00000113522	RAD50
ENSG00000118492	ADGB		ENSG00000113575	PPP2CA
ENSG00000118496	FBXO30		ENSG00000113583	C5orf15
ENSG00000118507	AKAP7		ENSG00000113593	PPWD1
ENSG00000118515	SGK1		ENSG00000113594	LIFR
ENSG00000118520	ARG1		ENSG00000113615	SEC24A
ENSG00000118600	RXYLT1		ENSG00000113638	TTC33
ENSG00000118620	ZNF430		ENSG00000113645	WWC1
ENSG00000118655	DCLRE1B		ENSG00000113658	SMAD5
ENSG00000118689	FOXO3		ENSG00000113712	CSNK1A1
ENSG00000118690	ARMC2		ENSG00000113716	HMGXB3
ENSG00000118733	OLFM3		ENSG00000113721	PDGFRB
ENSG00000118922	KLF12		ENSG00000113742	CPEB4
ENSG00000118946	PCDH17		ENSG00000113790	EHHADH
ENSG00000118965	WDR35		ENSG00000113810	SMC4
ENSG00000118972	FGF23		ENSG00000113812	ACTR8
ENSG00000118985	ELL2		ENSG00000113845	TIMMDC1
ENSG00000119004	CYP20A1		ENSG00000113966	ARL6
ENSG00000119041	GTF3C3		ENSG00000113971	NPHP3
ENSG00000119121	TRPM6		ENSG00000114021	NIT2
ENSG00000119138	KLF9		ENSG00000114030	KPNA1
ENSG00000119139	TJP2		ENSG00000114054	PCCB
ENSG00000119280	C1orf198		ENSG00000114062	UBE3A
ENSG00000119314	PTBP3		ENSG00000114098	ARMC8
ENSG00000119321	FKBP15		ENSG00000114107	CEP70
ENSG00000119335	SET		ENSG00000114166	KAT2B
ENSG00000119383	PTPA		ENSG00000114200	BCHE
ENSG00000119396	RAB14		ENSG00000114251	WNT5A
ENSG00000119402	FBXW2		ENSG00000114268	PFKFB4
ENSG00000119408	NEK6		ENSG00000114279	FGF12
ENSG00000119414	PPP6C		ENSG00000114302	PRKAR2A
ENSG00000119446	RBM18		ENSG00000114374	USP9Y
ENSG00000119457	SLC46A2		ENSG00000114383	TUSC2
ENSG00000119508	NR4A3		ENSG00000114388	NPRL2
ENSG00000119523	ALG2		ENSG00000114405	C3orf14
ENSG00000119537	KDSR		ENSG00000114416	FXR1
ENSG00000119547	ONECUT2		ENSG00000114423	CBLB
ENSG00000119596	YLPM1		ENSG00000114439	BBX
ENSG00000119638	NEK9		ENSG00000114450	GNB4
ENSG00000119661	DNAL1		ENSG00000114503	NCBP2
ENSG00000119682	AREL1		ENSG00000114520	SNX4
ENSG00000119685	TTLL5		ENSG00000114529	C3orf52
ENSG00000119688	ABCD4		ENSG00000114547	ROPN1B
ENSG00000119698	PPP4R4		ENSG00000114573	ATP6V1A
ENSG00000119703	ZC2HC1C		ENSG00000114638	UPK1B
ENSG00000119707	RBM25		ENSG00000114648	KLHL18
ENSG00000119711	ALDH6A1		ENSG00000114656	KIAA1257
ENSG00000119715	ESRRB		ENSG00000114698	PLSCR4
ENSG00000119718	EIF2B2		ENSG00000114738	MAPKAPK3
ENSG00000119720	NRDE2		ENSG00000114739	ACVR2B
ENSG00000119778	ATAD2B		ENSG00000114744	COMMD2
ENSG00000119787	ATL2		ENSG00000114757	PEX5L
ENSG00000119820	YIPF4		ENSG00000114796	KLHL24
ENSG00000119862	LGALSL		ENSG00000114805	PLCH1
ENSG00000119865	CNRIP1		ENSG00000114857	NKTR
ENSG00000119866	BCL11A		ENSG00000114859	CLCN2
ENSG00000119878	CRIPT		ENSG00000114861	FOXP1
ENSG00000119900	OGFRL1		ENSG00000114902	SPCS1
ENSG00000119906	SLF2		ENSG00000114904	NEK4
ENSG00000119922	IFIT2		ENSG00000114933	INO80D
ENSG00000119927	GPAM		ENSG00000114948	ADAM23
ENSG00000119953	SMNDC1		ENSG00000114978	MOB1A
ENSG00000119969	HELLS		ENSG00000114988	LMAN2L
ENSG00000119973	PRLHR		ENSG00000114993	RTKN
ENSG00000120008	WDR11		ENSG00000114999	TTL
ENSG00000120129	DUSP1		ENSG00000115042	FAHD2A
ENSG00000120211	INSL4		ENSG00000115084	SLC35F5
ENSG00000120215	MLANA		ENSG00000115091	ACTR3
ENSG00000120253	NUP43		ENSG00000115109	EPB41L5
ENSG00000120254	MTHFD1L		ENSG00000115112	TFCP2L1
ENSG00000120256	LRP11		ENSG00000115137	DNAJC27
ENSG00000120314	WDR55		ENSG00000115145	STAM2
ENSG00000120333	MRPS14		ENSG00000115155	OTOF
ENSG00000120341	SEC16B		ENSG00000115163	CENPA
ENSG00000120519	SLC10A7		ENSG00000115183	TANC1
ENSG00000120526	NUDCD1		ENSG00000115232	ITGA4
ENSG00000120549	KIAA1217		ENSG00000115233	PSMD14
ENSG00000120594	PLXDC2		ENSG00000115239	ASB3
ENSG00000120616	EPC1		ENSG00000115263	GCG
ENSG00000120669	SOHLH2		ENSG00000115271	GCA
ENSG00000120675	DNAJC15		ENSG00000115306	SPTBN1
ENSG00000120685	PROSER1		ENSG00000115339	GALNT3
ENSG00000120693	SMAD9		ENSG00000115353	TACR1
ENSG00000120697	ALG5		ENSG00000115355	CCDC88A
ENSG00000120705	ETF1		ENSG00000115364	MRPL19
ENSG00000120733	KDM3B		ENSG00000115365	LANCL1
ENSG00000120742	SERP1		ENSG00000115415	STAT1
ENSG00000120756	PLS1		ENSG00000115419	GLS
ENSG00000120802	TMPO		ENSG00000115421	PAPOLG
ENSG00000120805	ARL1		ENSG00000115425	PECR
ENSG00000120833	SOCS2		ENSG00000115464	USP34
ENSG00000120837	NFYB		ENSG00000115474	KCNJ13
ENSG00000120875	DUSP4		ENSG00000115486	GGCX
ENSG00000120889	TNFRSF10B		ENSG00000115504	EHBP1
ENSG00000120903	CHRNA2		ENSG00000115524	SF3B1
ENSG00000120913	PDLIM2		ENSG00000115525	ST3GAL5
ENSG00000120925	RNF170		ENSG00000115548	KDM3A
ENSG00000120942	UBIAD1		ENSG00000115561	CHMP3
ENSG00000120952	PRAMEF2		ENSG00000115568	ZNF142
ENSG00000120963	ZNF706		ENSG00000115594	IL1R1
ENSG00000120992	LYPLA1		ENSG00000115602	IL1RL1
ENSG00000121060	TRIM25		ENSG00000115616	SLC9A2
ENSG00000121067	SPOP		ENSG00000115641	FHL2
ENSG00000121068	TBX2		ENSG00000115648	MLPH
ENSG00000121152	NCAPH		ENSG00000115677	HDLBP
ENSG00000121207	LRAT		ENSG00000115687	PASK
ENSG00000121210	TMEM131L		ENSG00000115694	STK25
ENSG00000121211	MND1		ENSG00000115750	TAF1B
ENSG00000121236	TRIM6		ENSG00000115806	GORASP2
ENSG00000121274	TENT4B		ENSG00000115808	STRN
ENSG00000121281	ADCY7		ENSG00000115825	PRKD3
ENSG00000121310	ECHDC2		ENSG00000115828	QPCT
ENSG00000121350	PYROXD1		ENSG00000115875	SRSF7
ENSG00000121417	ZNF211		ENSG00000115896	PLCL1
ENSG00000121578	B4GALT4		ENSG00000115919	KYNU
ENSG00000121579	NAA50		ENSG00000115935	WIPF1
ENSG00000121644	DESI2		ENSG00000115944	COX7A2L
ENSG00000121671	CRY2		ENSG00000115956	PLEK
ENSG00000121741	ZMYM2		ENSG00000115966	ATF2
ENSG00000121743	GJA3		ENSG00000115970	THADA
ENSG00000121774	KHDRBS1		ENSG00000115977	AAK1
ENSG00000121807	CCR2		ENSG00000116001	TIA1
ENSG00000121858	TNFSF10		ENSG00000116005	PCYOX1
ENSG00000121864	ZNF639		ENSG00000116030	SUMO1
ENSG00000121897	LIAS		ENSG00000116095	PLEKHA3
ENSG00000121904	CSMD2		ENSG00000116106	EPHA4
ENSG00000121940	CLCC1		ENSG00000116132	PRRX1
ENSG00000121957	GPSM2		ENSG00000116133	DHCR24
ENSG00000121964	GTDC1		ENSG00000116138	DNAJC16
ENSG00000121988	ZRANB3		ENSG00000116171	SCP2
ENSG00000122008	POLK		ENSG00000116183	PAPPA2
ENSG00000122012	SV2C		ENSG00000116191	RALGPS2
ENSG00000122042	UBL3		ENSG00000116199	FAM20B
ENSG00000122068	FYTTD1		ENSG00000116205	TCEANC2
ENSG00000122121	XPNPEP2		ENSG00000116209	TMEM59
ENSG00000122145	TBX22		ENSG00000116218	NPHS2
ENSG00000122299	ZC3H7A		ENSG00000116254	CHD5
ENSG00000122335	SERAC1		ENSG00000116260	QSOX1
ENSG00000122359	ANXA11		ENSG00000116273	PHF13
ENSG00000122367	LDB3		ENSG00000116285	ERRFI1
ENSG00000122417	ODF2L		ENSG00000116299	KIAA1324
ENSG00000122420	PTGFR		ENSG00000116396	KCNC4
ENSG00000122435	TRMT13		ENSG00000116406	EDEM3
ENSG00000122484	RPAP2		ENSG00000116459	ATP5PB
ENSG00000122507	BBS9		ENSG00000116473	RAP1A
ENSG00000122545	SEPTIN7		ENSG00000116525	TRIM62
ENSG00000122557	HERPUD2		ENSG00000116539	ASH1L
ENSG00000122565	CBX3		ENSG00000116560	SFPQ
ENSG00000122591	FAM126A		ENSG00000116574	RHOU
ENSG00000122641	INHBA		ENSG00000116580	GON4L
ENSG00000122674	CCZ1		ENSG00000116604	MEF2D
ENSG00000122687	MRM2		ENSG00000116641	DOCK7
ENSG00000122694	GLIPR2		ENSG00000116667	C1orf21
ENSG00000122733	PHF24		ENSG00000116678	LEPR
ENSG00000122778	KIAA1549		ENSG00000116679	IVNS1ABP
ENSG00000122779	TRIM24		ENSG00000116701	NCF2
ENSG00000122786	CALD1		ENSG00000116704	SLC35D1
ENSG00000122787	AKR1D1		ENSG00000116729	WLS
ENSG00000122824	NUDT10		ENSG00000116731	PRDM2
ENSG00000122877	EGR2		ENSG00000116747	RO60
ENSG00000122882	ECD		ENSG00000116750	UCHL5
ENSG00000122884	P4HA1		ENSG00000116791	CRYZ
ENSG00000122966	CIT		ENSG00000116819	TFAP2E
ENSG00000123066	MED13L		ENSG00000116830	TTF2
ENSG00000123104	ITPR2		ENSG00000116833	NR5A2
ENSG00000123124	WWP1		ENSG00000116874	WARS2
ENSG00000123130	ACOT9		ENSG00000116903	EXOC8
ENSG00000123191	ATP7B		ENSG00000116918	TSNAX
ENSG00000123213	NLN		ENSG00000116922	C1orf109
ENSG00000123240	OPTN		ENSG00000116977	LGALS8
ENSG00000123297	TSFM		ENSG00000116990	MYCL
ENSG00000123307	NEUROD4		ENSG00000117009	KMO
ENSG00000123338	NCKAP1L		ENSG00000117010	ZNF684
ENSG00000123352	SPATS2		ENSG00000117013	KCNQ4
ENSG00000123407	HOXC12		ENSG00000117016	RIMS3
ENSG00000123472	ATPAF1		ENSG00000117020	AKT3
ENSG00000123473	STIL		ENSG00000117036	ETV3
ENSG00000123552	USP45		ENSG00000117054	ACADM
ENSG00000123561	SERPINA7		ENSG00000117133	RPF1
ENSG00000123572	NRK		ENSG00000117139	KDM5B
ENSG00000123584	MAGEA9		ENSG00000117151	CTBS
ENSG00000123600	METTL8		ENSG00000117152	RGS4
ENSG00000123612	ACVR1C		ENSG00000117153	KLHL12
ENSG00000123643	SLC36A1		ENSG00000117155	SSX2IP
ENSG00000123684	LPGAT1		ENSG00000117174	ZNHIT6
ENSG00000123700	KCNJ2		ENSG00000117226	GBP3
ENSG00000123728	RAP2C		ENSG00000117262	GPR89A
ENSG00000123737	EXOSC9		ENSG00000117266	CDK18
ENSG00000123739	PLA2G12A		ENSG00000117281	CD160
ENSG00000123908	AGO2		ENSG00000117335	CD46
ENSG00000123933	MXD4		ENSG00000117362	APH1A
ENSG00000123983	ACSL3		ENSG00000117394	SLC2A1
ENSG00000124019	FAM124B		ENSG00000117461	PIK3R3
ENSG00000124140	SLC12A5		ENSG00000117475	BLZF1
ENSG00000124145	SDC4		ENSG00000117479	SLC19A2
ENSG00000124151	NCOA3		ENSG00000117481	NSUN4
ENSG00000124155	PIGT		ENSG00000117500	TMED5
ENSG00000124181	PLCG1		ENSG00000117505	DR1
ENSG00000124193	SRSF6		ENSG00000117528	ABCD3
ENSG00000124203	ZNF831		ENSG00000117533	VAMP4
ENSG00000124208	TMEM189-UBE2V1		ENSG00000117569	PTBP2
ENSG00000124209	RAB22A		ENSG00000117593	DARS2
ENSG00000124214	STAU1		ENSG00000117595	IRF6
ENSG00000124222	STX16		ENSG00000117597	UTP25
ENSG00000124253	PCK1		ENSG00000117598	PLPPR5
ENSG00000124313	IQSEC2		ENSG00000117602	RCAN3
ENSG00000124333	VAMP7		ENSG00000117620	SLC35A3
ENSG00000124343	XG		ENSG00000117625	RCOR3
ENSG00000124357	NAGK		ENSG00000117676	RPS6KA1
ENSG00000124374	PAIP2B		ENSG00000117697	NSL1
ENSG00000124406	ATP8A1		ENSG00000117707	PROX1
ENSG00000124422	USP22		ENSG00000117751	PPP1R8
ENSG00000124429	POF1B		ENSG00000117758	STX12
ENSG00000124444	ZNF576		ENSG00000117859	OSBPL9
ENSG00000124459	ZNF45		ENSG00000117862	TXNDC12
ENSG00000124467	PSG8		ENSG00000117877	CD3EAP
ENSG00000124486	USP9X		ENSG00000117899	MESD
ENSG00000124491	F13A1		ENSG00000117906	RCN2
ENSG00000124535	WRNIP1		ENSG00000118007	STAG1
ENSG00000124564	SLC17A3		ENSG00000118058	KMT2A
ENSG00000124570	SERPINB6		ENSG00000118094	TREH
ENSG00000124571	XPO5		ENSG00000118113	MMP8
ENSG00000124588	NQO2		ENSG00000118162	KPTN
ENSG00000124596	OARD1		ENSG00000118193	KIF14
ENSG00000124614	RPS10		ENSG00000118197	DDX59
ENSG00000124635	H2BC11		ENSG00000118217	ATF6
ENSG00000124731	TREM1		ENSG00000118260	CREB1
ENSG00000124743	KLHL31		ENSG00000118263	KLF7
ENSG00000124766	SOX4		ENSG00000118276	B4GALT6
ENSG00000124783	SSR1		ENSG00000118307	CASC1
ENSG00000124795	DEK		ENSG00000118308	LRMP
ENSG00000124813	RUNX2		ENSG00000118322	ATP10B
ENSG00000124827	GCM2		ENSG00000118407	FILIP1
ENSG00000125046	SSUH2		ENSG00000118420	UBE3D
ENSG00000125144	MT1G		ENSG00000118454	ANKRD13C
ENSG00000125166	GOT2		ENSG00000118473	SGIP1
ENSG00000125246	CLYBL		ENSG00000118482	PHF3
ENSG00000125249	RAP2A		ENSG00000118492	ADGB
ENSG00000125285	SOX21		ENSG00000118496	FBXO30
ENSG00000125354	SEPTIN6		ENSG00000118507	AKAP7
ENSG00000125375	DMAC2L		ENSG00000118514	ALDH8A1
ENSG00000125386	FAM193A		ENSG00000118515	SGK1
ENSG00000125430	HS3ST3B1		ENSG00000118518	RNF146
ENSG00000125445	MRPS7		ENSG00000118520	ARG1
ENSG00000125458	NT5C		ENSG00000118526	TCF21
ENSG00000125484	GTF3C4		ENSG00000118579	MED28
ENSG00000125505	MBOAT7		ENSG00000118596	SLC16A7
ENSG00000125629	INSIG2		ENSG00000118655	DCLRE1B
ENSG00000125630	POLR1B		ENSG00000118689	FOXO3
ENSG00000125637	PSD4		ENSG00000118690	ARMC2
ENSG00000125675	GRIA3		ENSG00000118707	TGIF2
ENSG00000125735	TNFSF14		ENSG00000118804	STBD1
ENSG00000125741	OPA3		ENSG00000118816	CCNI
ENSG00000125744	RTN2		ENSG00000118849	RARRES1
ENSG00000125753	VASP		ENSG00000118873	RAB3GAP2
ENSG00000125772	GPCPD1		ENSG00000118900	UBN1
ENSG00000125813	PAX1		ENSG00000118922	KLF12
ENSG00000125818	PSMF1		ENSG00000118946	PCDH17
ENSG00000125821	DTD1		ENSG00000118960	HS1BP3
ENSG00000125827	TMX4		ENSG00000118961	LDAH
ENSG00000125831	CST11		ENSG00000118965	WDR35
ENSG00000125834	STK35		ENSG00000118972	FGF23
ENSG00000125835	SNRPB		ENSG00000118985	ELL2
ENSG00000125843	AP5S1		ENSG00000119004	CYP20A1
ENSG00000125848	FLRT3		ENSG00000119041	GTF3C3
ENSG00000125863	MKKS		ENSG00000119042	SATB2
ENSG00000125868	DSTN		ENSG00000119048	UBE2B
ENSG00000125898	FAM110A		ENSG00000119138	KLF9
ENSG00000125944	HNRNPR		ENSG00000119139	TJP2
ENSG00000125970	RALY		ENSG00000119185	ITGB1BP1
ENSG00000126003	PLAGL2		ENSG00000119283	TRIM67
ENSG00000126016	AMOT		ENSG00000119314	PTBP3
ENSG00000126070	AGO3		ENSG00000119318	RAD23B
ENSG00000126088	UROD		ENSG00000119396	RAB14
ENSG00000126091	ST3GAL3		ENSG00000119402	FBXW2
ENSG00000126214	KLC1		ENSG00000119408	NEK6
ENSG00000126216	TUBGCP3		ENSG00000119414	PPP6C
ENSG00000126217	MCF2L		ENSG00000119446	RBM18
ENSG00000126243	LRFN3		ENSG00000119471	HSDL2
ENSG00000126247	CAPNS1		ENSG00000119487	MAPKAP1
ENSG00000126261	UBA2		ENSG00000119508	NR4A3
ENSG00000126262	FFAR2		ENSG00000119509	INVS
ENSG00000126351	THRA		ENSG00000119514	GALNT12
ENSG00000126453	BCL2L12		ENSG00000119523	ALG2
ENSG00000126524	SBDS		ENSG00000119537	KDSR
ENSG00000126545	CSN1S1		ENSG00000119547	ONECUT2
ENSG00000126733	DACH2		ENSG00000119596	YLPM1
ENSG00000126746	ZNF384		ENSG00000119608	PROX2
ENSG00000126749	EMG1		ENSG00000119636	BBOF1
ENSG00000126773	PCNX4		ENSG00000119638	NEK9
ENSG00000126775	ATG14		ENSG00000119655	NPC2
ENSG00000126777	KTN1		ENSG00000119661	DNAL1
ENSG00000126778	SIX1		ENSG00000119669	IRF2BPL
ENSG00000126785	RHOJ		ENSG00000119681	LTBP2
ENSG00000126787	DLGAP5		ENSG00000119684	MLH3
ENSG00000126803	HSPA2		ENSG00000119688	ABCD4
ENSG00000126804	ZBTB1		ENSG00000119689	DLST
ENSG00000126858	RHOT1		ENSG00000119707	RBM25
ENSG00000126878	AIF1L		ENSG00000119711	ALDH6A1
ENSG00000126890	CTAG2		ENSG00000119715	ESRRB
ENSG00000126950	TMEM35A		ENSG00000119720	NRDE2
ENSG00000127022	CANX		ENSG00000119760	SUPT7L
ENSG00000127083	OMD		ENSG00000119771	KLHL29
ENSG00000127084	FGD3		ENSG00000119772	DNMT3A
ENSG00000127125	PPCS		ENSG00000119777	TMEM214
ENSG00000127152	BCL11B		ENSG00000119782	FKBP1B
ENSG00000127241	MASP1		ENSG00000119787	ATL2
ENSG00000127249	ATP13A4		ENSG00000119812	FAM98A
ENSG00000127311	HELB		ENSG00000119820	YIPF4
ENSG00000127314	RAP1B		ENSG00000119844	AFTPH
ENSG00000127325	BEST3		ENSG00000119865	CNRIP1
ENSG00000127328	RAB3IP		ENSG00000119866	BCL11A
ENSG00000127329	PTPRB		ENSG00000119878	CRIPT
ENSG00000127334	DYRK2		ENSG00000119900	OGFRL1
ENSG00000127419	TMEM175		ENSG00000119906	SLF2
ENSG00000127463	EMC1		ENSG00000119912	IDE
ENSG00000127472	PLA2G5		ENSG00000119913	TECTB
ENSG00000127483	HP1BP3		ENSG00000119946	CNNM1
ENSG00000127527	EPS15L1		ENSG00000119950	MXI1
ENSG00000127554	GFER		ENSG00000119969	HELLS
ENSG00000127603	MACF1		ENSG00000119973	PRLHR
ENSG00000127616	SMARCA4		ENSG00000119979	DENND10
ENSG00000127663	KDM4B		ENSG00000120008	WDR11
ENSG00000127804	METTL16		ENSG00000120053	GOT1
ENSG00000127831	VIL1		ENSG00000120063	GNA13
ENSG00000127838	PNKD		ENSG00000120071	KANSL1
ENSG00000127863	TNFRSF19		ENSG00000120093	HOXB3
ENSG00000127920	GNG11		ENSG00000120137	PANK3
ENSG00000127928	GNGT1		ENSG00000120149	MSX2
ENSG00000127946	HIP1		ENSG00000120156	TEK
ENSG00000127947	PTPN12		ENSG00000120162	MOB3B
ENSG00000127951	FGL2		ENSG00000120217	CD274
ENSG00000127952	STYXL1		ENSG00000120251	GRIA2
ENSG00000127955	GNAI1		ENSG00000120253	NUP43
ENSG00000127990	SGCE		ENSG00000120256	LRP11
ENSG00000127993	RBM48		ENSG00000120278	PLEKHG1
ENSG00000128011	LRFN1		ENSG00000120328	PCDHB12
ENSG00000128050	PAICS		ENSG00000120333	MRPS14
ENSG00000128052	KDR		ENSG00000120337	TNFSF18
ENSG00000128159	TUBGCP6		ENSG00000120370	GORAB
ENSG00000128266	GNAZ		ENSG00000120436	GPR31
ENSG00000128284	APOL3		ENSG00000120451	SNX19
ENSG00000128510	CPA4		ENSG00000120519	SLC10A7
ENSG00000128513	POT1		ENSG00000120533	ENY2
ENSG00000128534	LSM8		ENSG00000120594	PLXDC2
ENSG00000128573	FOXP2		ENSG00000120616	EPC1
ENSG00000128578	STRIP2		ENSG00000120647	CCDC77
ENSG00000128585	MKLN1		ENSG00000120656	TAF12
ENSG00000128594	LRRC4		ENSG00000120675	DNAJC15
ENSG00000128607	KLHDC10		ENSG00000120685	PROSER1
ENSG00000128609	NDUFA5		ENSG00000120690	ELF1
ENSG00000128645	HOXD1		ENSG00000120693	SMAD9
ENSG00000128656	CHN1		ENSG00000120694	HSPH1
ENSG00000128694	OSGEPL1		ENSG00000120705	ETF1
ENSG00000128699	ORMDL1		ENSG00000120709	FAM53C
ENSG00000128708	HAT1		ENSG00000120738	EGR1
ENSG00000128714	HOXD13		ENSG00000120742	SERP1
ENSG00000128731	HERC2		ENSG00000120784	ZFP30
ENSG00000128872	TMOD2		ENSG00000120798	NR2C1
ENSG00000128881	TTBK2		ENSG00000120802	TMPO
ENSG00000128891	CCDC32		ENSG00000120805	ARL1
ENSG00000128915	ICE2		ENSG00000120833	SOCS2
ENSG00000128923	MINDY2		ENSG00000120868	APAF1
ENSG00000128965	CHAC1		ENSG00000120875	DUSP4
ENSG00000128989	ARPP19		ENSG00000120889	TNFRSF10B
ENSG00000129003	VPS13C		ENSG00000120907	ADRA1A
ENSG00000129009	ISLR		ENSG00000120910	PPP3CC
ENSG00000129071	MBD4		ENSG00000120942	UBIAD1
ENSG00000129116	PALLD		ENSG00000120948	TARDBP
ENSG00000129128	SPCS3		ENSG00000121005	CRISPLD1
ENSG00000129158	SERGEF		ENSG00000121039	RDH10
ENSG00000129159	KCNC1		ENSG00000121057	AKAP1
ENSG00000129187	DCTD		ENSG00000121060	TRIM25
ENSG00000129197	RPAIN		ENSG00000121064	SCPEP1
ENSG00000129204	USP6		ENSG00000121067	SPOP
ENSG00000129214	SHBG		ENSG00000121073	SLC35B1
ENSG00000129292	PHF20L1		ENSG00000121101	TEX14
ENSG00000129315	CCNT1		ENSG00000121274	TENT4B
ENSG00000129317	PUS7L		ENSG00000121289	CEP89
ENSG00000129351	ILF3		ENSG00000121297	TSHZ3
ENSG00000129451	KLK10		ENSG00000121310	ECHDC2
ENSG00000129480	DTD2		ENSG00000121350	PYROXD1
ENSG00000129515	SNX6		ENSG00000121406	ZNF549
ENSG00000129521	EGLN3		ENSG00000121410	A1BG
ENSG00000129535	NRL		ENSG00000121446	RGSL1
ENSG00000129595	EPB41L4A		ENSG00000121481	RNF2
ENSG00000129625	REEP5		ENSG00000121570	DPPA4
ENSG00000129636	ITFG1		ENSG00000121579	NAA50
ENSG00000129646	QRICH2		ENSG00000121621	KIF18A
ENSG00000129657	SEC14L1		ENSG00000121644	DESI2
ENSG00000129682	FGF13		ENSG00000121741	ZMYM2
ENSG00000129691	ASH2L		ENSG00000121742	GJB6
ENSG00000129810	SGO1		ENSG00000121743	GJA3
ENSG00000129925	PGAP6		ENSG00000121769	FABP3
ENSG00000130032	PRRG3		ENSG00000121853	GHSR
ENSG00000130055	GDPD2		ENSG00000121864	ZNF639
ENSG00000130147	SH3BP4		ENSG00000121879	PIK3CA
ENSG00000130173	ANGPTL8		ENSG00000121892	PDS5A
ENSG00000130270	ATP8B3		ENSG00000121904	CSMD2
ENSG00000130312	MRPL34		ENSG00000121931	LRIF1
ENSG00000130348	QRSL1		ENSG00000121940	CLCC1
ENSG00000130363	RSPH3		ENSG00000121957	GPSM2
ENSG00000130368	MAS1		ENSG00000121964	GTDC1
ENSG00000130396	AFDN		ENSG00000121988	ZRANB3
ENSG00000130413	STK33		ENSG00000122008	POLK
ENSG00000130414	NDUFA10		ENSG00000122012	SV2C
ENSG00000130508	PXDN		ENSG00000122042	UBL3
ENSG00000130513	GDF15		ENSG00000122068	FYTTD1
ENSG00000130520	LSM4		ENSG00000122126	OCRL
ENSG00000130529	TRPM4		ENSG00000122133	PAEP
ENSG00000130540	SULT4A1		ENSG00000122145	TBX22
ENSG00000130544	ZNF557		ENSG00000122257	RBBP6
ENSG00000130559	CAMSAP1		ENSG00000122335	SERAC1
ENSG00000130589	HELZ2		ENSG00000122359	ANXA11
ENSG00000130592	LSP1		ENSG00000122378	PRXL2A
ENSG00000130699	TAF4		ENSG00000122390	NAA60
ENSG00000130700	GATA5		ENSG00000122417	ODF2L
ENSG00000130702	LAMA5		ENSG00000122420	PTGFR
ENSG00000130816	DNMT1		ENSG00000122435	TRMT13
ENSG00000130818	ZNF426		ENSG00000122477	LRRC39
ENSG00000130826	DKC1		ENSG00000122482	ZNF644
ENSG00000130844	ZNF331		ENSG00000122484	RPAP2
ENSG00000130935	NOL11		ENSG00000122507	BBS9
ENSG00000130939	UBE4B		ENSG00000122545	SEPTIN7
ENSG00000130956	HABP4		ENSG00000122550	KLHL7
ENSG00000130962	PRRG1		ENSG00000122565	CBX3
ENSG00000131013	PPIL4		ENSG00000122566	HNRNPA2B1
ENSG00000131016	AKAP12		ENSG00000122584	NXPH1
ENSG00000131018	SYNE1		ENSG00000122591	FAM126A
ENSG00000131023	LATS1		ENSG00000122641	INHBA
ENSG00000131044	TTLL9		ENSG00000122643	NT5C3A
ENSG00000131051	RBM39		ENSG00000122644	ARL4A
ENSG00000131069	ACSS2		ENSG00000122692	SMU1
ENSG00000131080	EDA2R		ENSG00000122733	PHF24
ENSG00000131089	ARHGEF9		ENSG00000122741	DCAF10
ENSG00000131095	GFAP		ENSG00000122778	KIAA1549
ENSG00000131127	ZNF141		ENSG00000122779	TRIM24
ENSG00000131174	COX7B		ENSG00000122786	CALD1
ENSG00000131196	NFATC1		ENSG00000122787	AKR1D1
ENSG00000131238	PPT1		ENSG00000122862	SRGN
ENSG00000131263	RLIM		ENSG00000122863	CHST3
ENSG00000131269	ABCB7		ENSG00000122873	CISD1
ENSG00000131351	HAUS8		ENSG00000122986	HVCN1
ENSG00000131374	TBC1D5		ENSG00000123064	DDX54
ENSG00000131386	GALNT15		ENSG00000123066	MED13L
ENSG00000131389	SLC6A6		ENSG00000123091	RNF11
ENSG00000131408	NR1H2		ENSG00000123094	RASSF8
ENSG00000131446	MGAT1		ENSG00000123095	BHLHE41
ENSG00000131470	PSMC3IP		ENSG00000123096	SSPN
ENSG00000131475	VPS25		ENSG00000123104	ITPR2
ENSG00000131504	DIAPH1		ENSG00000123130	ACOT9
ENSG00000131620	ANO1		ENSG00000123136	DDX39A
ENSG00000131653	TRAF7		ENSG00000123179	EBPL
ENSG00000131721	RHOXF2		ENSG00000123191	ATP7B
ENSG00000131725	WDR44		ENSG00000123200	ZC3H13
ENSG00000131746	TNS4		ENSG00000123213	NLN
ENSG00000131781	FMO5		ENSG00000123240	OPTN
ENSG00000131791	PRKAB2		ENSG00000123243	ITIH5
ENSG00000131844	MCCC2		ENSG00000123268	ATF1
ENSG00000131873	CHSY1		ENSG00000123297	TSFM
ENSG00000131931	THAP1		ENSG00000123329	ARHGAP9
ENSG00000131969	ABHD12B		ENSG00000123338	NCKAP1L
ENSG00000131979	GCH1		ENSG00000123353	ORMDL2
ENSG00000132010	ZNF20		ENSG00000123384	LRP1
ENSG00000132153	DHX30		ENSG00000123405	NFE2
ENSG00000132164	SLC6A11		ENSG00000123415	SMUG1
ENSG00000132170	PPARG		ENSG00000123416	TUBA1B
ENSG00000132196	HSD17B7		ENSG00000123427	EEF1AKMT3
ENSG00000132199	ENOSF1		ENSG00000123545	NDUFAF4
ENSG00000132254	ARFIP2		ENSG00000123552	USP45
ENSG00000132274	TRIM22		ENSG00000123560	PLP1
ENSG00000132297	HHLA1		ENSG00000123570	RAB9B
ENSG00000132313	MRPL35		ENSG00000123572	NRK
ENSG00000132326	PER2		ENSG00000123575	FAM199X
ENSG00000132330	SCLY		ENSG00000123600	METTL8
ENSG00000132341	RAN		ENSG00000123607	TTC21B
ENSG00000132405	TBC1D14		ENSG00000123612	ACVR1C
ENSG00000132424	PNISR		ENSG00000123643	SLC36A1
ENSG00000132434	LANCL2		ENSG00000123684	LPGAT1
ENSG00000132466	ANKRD17		ENSG00000123700	KCNJ2
ENSG00000132470	ITGB4		ENSG00000123737	EXOSC9
ENSG00000132475	H3-3B		ENSG00000123739	PLA2G12A
ENSG00000132478	UNK		ENSG00000123815	COQ8B
ENSG00000132530	XAF1		ENSG00000123836	PFKFB2
ENSG00000132549	VPS13B		ENSG00000123908	AGO2
ENSG00000132570	PCBD2		ENSG00000123983	ACSL3
ENSG00000132589	FLOT2		ENSG00000124019	FAM124B
ENSG00000132664	POLR3F		ENSG00000124067	SLC12A4
ENSG00000132680	KHDC4		ENSG00000124098	FAM210B
ENSG00000132716	DCAF8		ENSG00000124120	TTPAL
ENSG00000132749	TESMIN		ENSG00000124126	PREX1
ENSG00000132763	MMACHC		ENSG00000124134	KCNS1
ENSG00000132768	DPH2		ENSG00000124140	SLC12A5
ENSG00000132780	NASP		ENSG00000124151	NCOA3
ENSG00000132823	OSER1		ENSG00000124155	PIGT
ENSG00000132825	PPP1R3D		ENSG00000124164	VAPB
ENSG00000132846	ZBED3		ENSG00000124172	ATP5F1E
ENSG00000132849	PATJ		ENSG00000124193	SRSF6
ENSG00000132874	SLC14A2		ENSG00000124203	ZNF831
ENSG00000132906	CASP9		ENSG00000124209	RAB22A
ENSG00000132938	MTUS2		ENSG00000124215	CDH26
ENSG00000132950	ZMYM5		ENSG00000124217	MOCS3
ENSG00000132953	XPO4		ENSG00000124222	STX16
ENSG00000132964	CDK8		ENSG00000124226	RNF114
ENSG00000132970	WASF3		ENSG00000124228	DDX27
ENSG00000132975	GPR12		ENSG00000124232	RBPJL
ENSG00000133019	CHRM3		ENSG00000124243	BCAS4
ENSG00000133027	PEMT		ENSG00000124257	NEURL2
ENSG00000133028	SCO1		ENSG00000124260	MAGEA10
ENSG00000133030	MPRIP		ENSG00000124343	XG
ENSG00000133059	DSTYK		ENSG00000124356	STAMBP
ENSG00000133083	DCLK1		ENSG00000124357	NAGK
ENSG00000133103	COG6		ENSG00000124380	SNRNP27
ENSG00000133104	SPART		ENSG00000124406	ATP8A1
ENSG00000133107	TRPC4		ENSG00000124429	POF1B
ENSG00000133114	GPALPP1		ENSG00000124467	PSG8
ENSG00000133116	KL		ENSG00000124469	CEACAM8
ENSG00000133121	STARD13		ENSG00000124486	USP9X
ENSG00000133131	MORC4		ENSG00000124493	GRM4
ENSG00000133193	FAM104A		ENSG00000124523	SIRT5
ENSG00000133316	WDR74		ENSG00000124532	MRS2
ENSG00000133424	LARGE1		ENSG00000124564	SLC17A3
ENSG00000133488	SEC14L4		ENSG00000124596	OARD1
ENSG00000133574	GIMAP4		ENSG00000124602	UNC5CL
ENSG00000133640	LRRIQ1		ENSG00000124615	MOCS1
ENSG00000133657	ATP13A3		ENSG00000124635	H2BC11
ENSG00000133687	TMTC1		ENSG00000124678	TCP11
ENSG00000133703	KRAS		ENSG00000124733	MEA1
ENSG00000133704	IPO8		ENSG00000124743	KLHL31
[truncated: 4,670 more rows]
